# Supplementary material for: Transcriptional Coactivator BOB1 (OBF1, OCA-B) Modulates the Specificity of DNA Recognition by the POU-Domain Factors OCT1 and OCT2 in a Monomeric Configuration
Source: MDPI journal article supplement (doi:10.3390/biom14010123), 2024-01-17
Supplement: s1 [file Tables S1-S3.xlsx]

## Sheet: Table S1. Sorted by freqsum
	Frequency								Relative frequency
sequense	POU1	POU1+BOB1	POU2	POU2+BOB1	freqsum			sequense	POU1	POU1+BOB1	POU2	POU2+BOB1	freqsum
ATGCAAAT	13946	20974	9404	15296	59620			ATGCAAAT	5.3186	8.18446	5.4111	12.6271	7.32968
ATGTAAAT	9047	5896	5025	4328	24296			ATGTAAAT	3.45026	2.30073	2.8914	3.57284	2.98695
ATGCAAAA	3928	8080	2037	3988	18033			ATGCAAAA	1.49802	3.15297	1.1721	3.29217	2.21698
AATGCAAA	3576	6603	1919	3888	15986			AATGCAAA	1.36378	2.57662	1.1042	3.20962	1.96532
ATTTGAAT	4834	4930	2608	2806	15178			ATTTGAAT	1.84355	1.92378	1.50065	2.3164	1.86598
ATTTAAAT	7412	1816	4130	1008	14366			ATTTAAAT	2.82672	0.708639	2.37642	0.832123	1.76616
ATTCAAAT	4132	4027	2247	2362	12768			ATTCAAAT	1.57582	1.57141	1.29293	1.94987	1.5697
ATGCAAAG	2787	5682	1444	2752	12665			ATGCAAAG	1.06288	2.21723	0.830883	2.27183	1.55703
AGGCAAAT	2019	5698	949	2599	11265			AGGCAAAT	0.769988	2.22347	0.546058	2.14552	1.38492
ATGCTAAT	4860	637	3169	343	9009			ATGCTAAT	1.85346	0.24857	1.82345	0.283153	1.10757
ATGGAAAT	2472	2456	1256	1189	7373			ATGGAAAT	0.942749	0.958379	0.722707	0.981541	0.906437
ATGCAAAC	1424	3451	773	1536	7184			ATGCAAAC	0.543072	1.34665	0.444787	1.268	0.883201
ACGCAAAT	1479	3265	710	1668	7122			ACGCAAAT	0.564047	1.27407	0.408537	1.37696	0.875579
ATGTTAAT	3633	532	2279	291	6735			ATGTTAAT	1.38552	0.207597	1.31135	0.240226	0.828001
AGTCAAAT	1484	3029	638	1264	6415			AGTCAAAT	0.565954	1.18197	0.367108	1.04346	0.78866
ATGGTAAT	3320	517	2221	265	6323			ATGGTAAT	1.26615	0.201744	1.27797	0.218762	0.77735
AGGGAAAT	1440	2467	634	864	5405			AGGGAAAT	0.549174	0.962672	0.364806	0.713248	0.664491
ATGTAAAA	1871	1616	862	749	5098			ATGTAAAA	0.713545	0.630595	0.495998	0.618313	0.626748
ATTATAAT	2465	418	1799	251	4933			ATTATAAT	0.940079	0.163112	1.03515	0.207205	0.606463
AATTTAAA	2395	776	1378	378	4927			AATTTAAA	0.913383	0.30281	0.792906	0.312046	0.605725
AAGCAAAT	992	2323	470	1001	4786			AAGCAAAT	0.37832	0.90648	0.27044	0.826344	0.588391
AATGTAAA	1610	1402	884	669	4565			AATGTAAA	0.614007	0.547088	0.508657	0.552272	0.561221
AAACAAAT	922	1949	462	811	4144			AAACAAAT	0.351624	0.760538	0.265837	0.669495	0.509463
ATTTTAAT	1763	661	1180	268	3872			ATTTTAAT	0.672357	0.257935	0.678976	0.221239	0.476024
ATGTAAAG	1283	1252	683	578	3796			ATGTAAAG	0.489299	0.488555	0.393001	0.47715	0.46668
ATGAAAAT	978	1587	529	628	3722			ATGAAAAT	0.372981	0.619278	0.304389	0.518426	0.457583
ATTAAAAT	1610	584	1105	247	3546			ATTAAAAT	0.614007	0.227888	0.635821	0.203903	0.435945
AGGTAAAT	993	1410	467	474	3344			AGGTAAAT	0.378701	0.55021	0.268714	0.391296	0.411111
ATACAAAT	833	1348	467	603	3251			ATACAAAT	0.317682	0.526016	0.268714	0.497788	0.399678
AATTCAAA	978	1123	508	485	3094			AATTCAAA	0.372981	0.438217	0.292305	0.400376	0.380376
ATTAGAAT	1312	342	1060	218	2932			ATTAGAAT	0.500358	0.133455	0.609928	0.179963	0.36046
AAATTAAT	1087	625	830	348	2890			AAATTAAT	0.41455	0.243887	0.477585	0.28728	0.355297
ATGATAAT	1345	353	1012	164	2874			ATGATAAT	0.512944	0.137747	0.582309	0.135385	0.35333
ATTCAAAA	957	1094	482	337	2870			ATTCAAAA	0.364972	0.4269	0.277345	0.2782	0.352838
AGGAAAAT	752	1300	348	420	2820			AGGAAAAT	0.286791	0.507285	0.200241	0.346718	0.346691
ATATTAAT	1111	365	970	215	2661			ATATTAAT	0.423703	0.14243	0.558142	0.177486	0.327143
ATTCTAAT	1175	308	924	184	2591			ATTCTAAT	0.448111	0.120188	0.531673	0.151895	0.318538
AATCAAAT	774	1075	369	365	2583			AATCAAAT	0.295181	0.419486	0.212324	0.301314	0.317554
AAATTAAG	794	611	594	387	2386			AAATTAAG	0.302808	0.238424	0.34179	0.319476	0.293335
AAATTAAA	861	547	606	263	2277			AAATTAAA	0.32836	0.21345	0.348695	0.217111	0.279934
AGGCAAAA	619	1163	237	247	2266			AGGCAAAA	0.236069	0.453825	0.136371	0.203903	0.278582
AAGGCAAA	582	1134	204	337	2257			AAGGCAAA	0.221958	0.442509	0.117382	0.2782	0.277476
AATTAAAT	874	486	677	210	2247			AATTAAAT	0.333318	0.189647	0.389548	0.173359	0.276246
AATTAAAA	955	401	694	183	2233			AATTAAAA	0.364209	0.156478	0.39933	0.15107	0.274525
ATTCAAAG	736	804	350	293	2183			ATTCAAAG	0.280689	0.313737	0.201391	0.241877	0.268378
AAATTAAC	876	483	574	237	2170			AAATTAAC	0.334081	0.188476	0.330282	0.195648	0.26678
AATTTAAT	803	467	579	196	2045			AATTTAAT	0.306241	0.182233	0.333159	0.161802	0.251412
ATTGCAAA	530	826	290	392	2038			ATTGCAAA	0.202127	0.322321	0.166867	0.323603	0.250552
AAATAAAT	685	595	478	267	2025			AAATAAAT	0.261239	0.232181	0.275043	0.220413	0.248953
ATGTAAAC	652	752	340	275	2019			ATGTAAAC	0.248654	0.293445	0.195637	0.227018	0.248216
ATTTAAAA	795	456	519	166	1936			ATTTAAAA	0.30319	0.17794	0.298635	0.137036	0.238012
ATATTAAA	779	335	635	169	1918			ATATTAAA	0.297088	0.130724	0.365381	0.139513	0.235799
ATTGTAAT	819	297	621	166	1903			ATTGTAAT	0.312343	0.115895	0.357326	0.137036	0.233955
AAATGAAT	671	464	475	289	1899			AAATGAAT	0.2559	0.181062	0.273317	0.238575	0.233463
ATTGAAAT	675	485	504	166	1830			ATTGAAAT	0.257425	0.189256	0.290004	0.137036	0.22498
ATGGAAAA	610	741	282	178	1811			ATGGAAAA	0.232636	0.289153	0.162264	0.146942	0.222644
AATGGAAA	634	686	269	199	1788			AATGGAAA	0.241789	0.267691	0.154784	0.164278	0.219817
ATAATAAT	715	283	614	173	1785			ATAATAAT	0.27268	0.110432	0.353298	0.142815	0.219448
AAGGAAAT	523	737	272	207	1739			AAGGAAAT	0.199457	0.287592	0.15651	0.170882	0.213793
ATTTCAAT	624	447	465	172	1708			ATTTCAAT	0.237975	0.174428	0.267563	0.141989	0.209981
AGTAAAAT	592	606	311	179	1688			AGTAAAAT	0.225772	0.236473	0.178951	0.147768	0.207523
ATATGAAT	637	312	549	171	1669			ATATGAAT	0.242933	0.121748	0.315897	0.141164	0.205187
AGTTAAAT	574	555	371	154	1654			AGTTAAAT	0.218907	0.216572	0.213475	0.12713	0.203343
ACGTAAAT	570	594	299	178	1641			ACGTAAAT	0.217381	0.23179	0.172046	0.146942	0.201745
AATAAAAT	562	474	372	199	1607			AATAAAAT	0.21433	0.184964	0.21405	0.164278	0.197565
AGGGAAAA	537	717	206	144	1604			AGGGAAAA	0.204796	0.279787	0.118533	0.118875	0.197196
AAGGGAAA	513	653	253	165	1584			AAGGGAAA	0.195643	0.254813	0.145577	0.136211	0.194737
ATATGAAA	418	579	285	289	1571			ATATGAAA	0.159413	0.225937	0.16399	0.238575	0.193139
AATATAAT	559	352	497	161	1569			AATATAAT	0.213186	0.137357	0.285976	0.132908	0.192893
ACATAAAT	603	299	436	214	1552			ACATAAAT	0.229967	0.116676	0.250876	0.176661	0.190803
AACCAAAT	436	658	210	218	1522			AACCAAAT	0.166278	0.256764	0.120835	0.179963	0.187115
AACGCAAA	386	681	170	278	1515			AACGCAAA	0.147209	0.26574	0.0978186	0.229494	0.186254
AAGTAAAT	498	582	254	178	1512			AAGTAAAT	0.189923	0.227108	0.146153	0.146942	0.185885
AGCATAAT	705	194	482	128	1509			AGCATAAT	0.268866	0.0757026	0.277345	0.105666	0.185516
ATGCTAAA	716	177	510	99	1502			ATGCTAAA	0.273061	0.0690689	0.293456	0.0817263	0.184656
AAATGAAG	447	476	327	242	1492			AAATGAAG	0.170473	0.185744	0.188157	0.199775	0.183426
AAATAAAA	465	509	308	207	1489			AAATAAAA	0.177337	0.198622	0.177224	0.170882	0.183058
AGGGAAAG	510	569	236	172	1487			AGGGAAAG	0.194499	0.222035	0.135795	0.141989	0.182812
ACGCAAAA	395	710	164	190	1459			ACGCAAAA	0.150641	0.277056	0.0943662	0.156849	0.179369
AGTCAAAA	429	679	204	139	1451			AGTCAAAA	0.163608	0.264959	0.117382	0.114747	0.178386
AGAATAAT	533	243	522	148	1446			AGAATAAT	0.203271	0.0948233	0.300361	0.122177	0.177771
AAAACAAA	415	672	206	151	1444			AAAACAAA	0.158269	0.262228	0.118533	0.124653	0.177525
AGGGTAAT	489	307	485	156	1437			AGGGTAAT	0.18649	0.119797	0.279071	0.128781	0.176665
AAACAAAA	410	655	200	169	1434			AAACAAAA	0.156362	0.255594	0.115081	0.139513	0.176296
AAGTCAAA	370	661	196	200	1427			AAGTCAAA	0.141107	0.257935	0.112779	0.165104	0.175435
AATTGAAT	531	326	413	151	1421			AATTGAAT	0.202508	0.127212	0.237642	0.124653	0.174698
AAAATAAT	466	391	369	188	1414			AAAATAAT	0.177719	0.152576	0.212324	0.155197	0.173837
AGTATAAT	503	222	503	146	1374			AGTATAAT	0.19183	0.0866287	0.289428	0.120526	0.16892
ATAATAAA	508	301	437	121	1367			ATAATAAA	0.193736	0.117456	0.251451	0.0998877	0.168059
AATGAAAA	431	518	265	138	1352			AATGAAAA	0.164371	0.202134	0.152482	0.113922	0.166215
ATCTGAAT	528	261	403	153	1345			ATCTGAAT	0.201364	0.101847	0.231888	0.126304	0.165354
AAATGAAA	394	537	232	178	1341			AAATGAAA	0.15026	0.209548	0.133494	0.146942	0.164863
AGGCAAAG	382	660	136	158	1336			AGGCAAAG	0.145684	0.257545	0.0782549	0.130432	0.164248
AAGAAAAT	414	579	217	116	1326			AAGAAAAT	0.157888	0.225937	0.124863	0.0957601	0.163018
ATTCAAAC	402	511	261	152	1326			ATTCAAAC	0.153311	0.199402	0.15018	0.125479	0.163018
ATTTTAAA	520	324	355	125	1324			ATTTTAAA	0.198313	0.126431	0.204268	0.10319	0.162773
ATAATAAG	478	241	449	153	1321			ATAATAAG	0.182295	0.0940429	0.258356	0.126304	0.162404
ATCTAAAT	452	315	394	149	1310			ATCTAAAT	0.17238	0.122919	0.226709	0.123002	0.161051
AAATAAAG	409	430	262	207	1308			AAATAAAG	0.155981	0.167794	0.150756	0.170882	0.160806
AATTAAAG	490	288	383	146	1307			AATTAAAG	0.186872	0.112383	0.22038	0.120526	0.160683
ATTACAAT	511	217	452	117	1297			ATTACAAT	0.19488	0.0846776	0.260083	0.0965857	0.159453
ATGTTAAA	557	245	375	108	1285			ATGTTAAA	0.212424	0.0956038	0.215776	0.089156	0.157978
ATTTAAAG	481	389	322	92	1284			ATTTAAAG	0.183439	0.151795	0.18528	0.0759477	0.157855
ATGAAAAA	391	524	213	147	1275			ATGAAAAA	0.149116	0.204475	0.122561	0.121351	0.156748
ATAGGAAA	343	547	194	177	1261			ATAGGAAA	0.13081	0.21345	0.111628	0.146117	0.155027
ATATTAAG	514	226	372	142	1254			ATATTAAG	0.196025	0.0881896	0.21405	0.117224	0.154167
ATGGAAAG	389	511	195	156	1251			ATGGAAAG	0.148353	0.199402	0.112204	0.128781	0.153798
ATTAAAAA	451	293	381	109	1234			ATTAAAAA	0.171998	0.114334	0.219229	0.0899815	0.151708
ATCCAAAT	344	535	192	161	1232			ATCCAAAT	0.131192	0.208767	0.110478	0.132908	0.151462
AATGGAAT	361	321	369	178	1229			AATGGAAT	0.137675	0.12526	0.212324	0.146942	0.151093
AAAAAAAA	289	445	335	157	1226			AAAAAAAA	0.110216	0.173648	0.19276	0.129606	0.150724
AGTGAAAT	363	501	215	146	1225			AGTGAAAT	0.138438	0.1955	0.123712	0.120526	0.150601
ATATAAAT	420	276	385	140	1221			ATATAAAT	0.160176	0.107701	0.22153	0.115573	0.15011
AAATCAAA	348	498	203	165	1214			AAATCAAA	0.132717	0.194329	0.116807	0.136211	0.149249
ATGGTAAA	476	270	332	129	1207			ATGGTAAA	0.181533	0.105359	0.191034	0.106492	0.148389
AAATCAAT	364	415	248	179	1206			AAATCAAT	0.138819	0.161941	0.1427	0.147768	0.148266
AATGTAAT	444	279	315	166	1204			AATGTAAT	0.169329	0.108871	0.181252	0.137036	0.14802
AGGTTAAT	455	236	375	131	1197			AGGTTAAT	0.173524	0.0920918	0.215776	0.108143	0.147159
AAAATAAA	401	379	278	127	1185			AAAATAAA	0.15293	0.147893	0.159962	0.104841	0.145684
AAGCAAAA	372	523	156	129	1180			AAGCAAAA	0.14187	0.204085	0.089763	0.106492	0.145069
AGGATAAT	441	244	363	128	1176			AGGATAAT	0.168185	0.0952136	0.208872	0.105666	0.144577
AGCATAAA	536	145	370	105	1156			AGCATAAA	0.204415	0.0565818	0.212899	0.0866794	0.142119
AATTTAAG	393	368	247	145	1153			AATTTAAG	0.149879	0.143601	0.142125	0.1197	0.14175
ATACAAAA	377	500	149	127	1153			ATACAAAA	0.143777	0.19511	0.0857352	0.104841	0.14175
AATGAAAT	364	359	272	146	1141			AATGAAAT	0.138819	0.140089	0.15651	0.120526	0.140275
AAGTTAAT	432	262	310	124	1128			AAGTTAAT	0.164752	0.102238	0.178375	0.102364	0.138676
ACATTAAT	433	199	373	123	1128			ACATTAAT	0.165134	0.0776537	0.214626	0.101539	0.138676
AATTTAAC	447	300	255	119	1121			AATTTAAC	0.170473	0.117066	0.146728	0.0982367	0.137816
AATATAAA	410	275	309	122	1116			AATATAAA	0.156362	0.10731	0.1778	0.100713	0.137201
ATTTGAAA	372	456	173	113	1114			ATTTGAAA	0.14187	0.17794	0.0995449	0.0932836	0.136955
ATTAAAAG	391	294	297	123	1105			ATTAAAAG	0.149116	0.114725	0.170895	0.101539	0.135849
AGATTAAT	385	231	359	129	1104			AGATTAAT	0.146828	0.0901407	0.20657	0.106492	0.135726
AAAGAAAT	379	411	194	116	1100			AAAGAAAT	0.14454	0.16038	0.111628	0.0957601	0.135234
AGGAAAAA	352	462	158	124	1096			AGGAAAAA	0.134243	0.180281	0.0909138	0.102364	0.134742
ATGAAAAG	353	449	184	105	1091			ATGAAAAG	0.134624	0.175209	0.105874	0.0866794	0.134128
ATACTAAT	447	191	316	133	1087			ATACTAAT	0.170473	0.0745319	0.181828	0.109794	0.133636
AAAAAAAT	341	390	209	145	1085			AAAAAAAT	0.130047	0.152186	0.120259	0.1197	0.13339
AAGATAAT	361	210	352	156	1079			AAGATAAT	0.137675	0.0819461	0.202542	0.128781	0.132652
AAAATAAG	342	379	218	138	1077			AAAATAAG	0.130429	0.147893	0.125438	0.113922	0.132406
ATTTAAAC	359	299	280	132	1070			ATTTAAAC	0.136912	0.116676	0.161113	0.108968	0.131546
AATACAAA	352	378	187	147	1064			AATACAAA	0.134243	0.147503	0.107601	0.121351	0.130808
ATCTTAAT	330	264	306	163	1063			ATCTTAAT	0.125852	0.103018	0.176074	0.13456	0.130685
AATTAAAC	367	232	337	117	1053			AATTAAAC	0.139963	0.0905309	0.193911	0.0965857	0.129456
ATTGGAAT	370	248	312	117	1047			ATTGGAAT	0.141107	0.0967744	0.179526	0.0965857	0.128718
AGAATAAA	423	194	316	108	1041			AGAATAAA	0.16132	0.0757026	0.181828	0.089156	0.127981
ATGTGAAT	363	236	275	162	1036			ATGTGAAT	0.138438	0.0920918	0.158236	0.133734	0.127366
AGACAAAT	299	479	130	127	1035			AGACAAAT	0.11403	0.186915	0.0748025	0.104841	0.127243
AAATAAAC	303	364	207	158	1032			AAATAAAC	0.115555	0.14204	0.119109	0.130432	0.126874
AGTCAAAG	305	479	130	117	1031			AGTCAAAG	0.116318	0.186915	0.0748025	0.0965857	0.126751
ATTATAAA	399	177	354	97	1027			ATTATAAA	0.152167	0.0690689	0.203693	0.0800753	0.126259
AATAAAAA	358	320	229	116	1023			AATAAAAA	0.136531	0.12487	0.131767	0.0957601	0.125768
AAGGAAAA	295	436	166	121	1018			AAGGAAAA	0.112504	0.170136	0.095517	0.0998877	0.125153
ACATGAAT	396	198	311	112	1017			ACATGAAT	0.151023	0.0772635	0.178951	0.0924581	0.12503
ACACAAAT	303	448	149	111	1011			ACACAAAT	0.115555	0.174818	0.0857352	0.0916325	0.124292
AAGGTAAT	321	237	284	155	997			AAGGTAAT	0.12242	0.092482	0.163415	0.127955	0.122571
ATGCGAAT	324	231	286	155	996			ATGCGAAT	0.123564	0.0901407	0.164565	0.127955	0.122448
AGGTAAAA	337	374	174	103	988			AGGTAAAA	0.128522	0.145942	0.10012	0.0850284	0.121465
ATATTAAC	397	171	329	91	988			ATATTAAC	0.151404	0.0667275	0.189308	0.0751222	0.121465
AGTCTAAT	385	195	288	116	984			AGTCTAAT	0.146828	0.0760928	0.165716	0.0957601	0.120973
AAAGCAAA	279	459	131	110	979			AAAGCAAA	0.106402	0.179111	0.0753779	0.090807	0.120358
AGGCTAAT	350	173	342	110	975			AGGCTAAT	0.13348	0.067508	0.196788	0.090807	0.119866
ATAGTAAA	314	329	199	129	971			ATAGTAAA	0.11975	0.128382	0.114505	0.106492	0.119375
AGTTTAAT	337	226	271	134	968			AGTTTAAT	0.128522	0.0881896	0.155934	0.110619	0.119006
ATTGTAAA	303	368	184	112	967			ATTGTAAA	0.115555	0.143601	0.105874	0.0924581	0.118883
ATAAAAAT	344	292	217	109	962			ATAAAAAT	0.131192	0.113944	0.124863	0.0899815	0.118268
AAACAAAG	300	422	129	108	959			AAACAAAG	0.114411	0.164673	0.0742271	0.089156	0.117899
AAGGTAAA	283	368	190	113	954			AAGGTAAA	0.107928	0.143601	0.109327	0.0932836	0.117285
AACAAAAT	312	359	161	119	951			AACAAAAT	0.118988	0.140089	0.09264	0.0982367	0.116916
AATCAAAA	320	363	172	96	951			AATCAAAA	0.122039	0.14165	0.0989695	0.0792498	0.116916
ATGCTAAG	391	199	271	88	949			ATGCTAAG	0.149116	0.0776537	0.155934	0.0726456	0.11667
ATTATAAG	318	216	283	117	934			ATTATAAG	0.121276	0.0842874	0.162839	0.0965857	0.114826
AAATGAAC	302	281	178	171	932			AAATGAAC	0.115174	0.109652	0.102422	0.141164	0.11458
AATTCAAT	317	243	217	152	929			AATTCAAT	0.120895	0.0948233	0.124863	0.125479	0.114211
ATGGGAAT	307	255	223	141	926			ATGGGAAT	0.117081	0.099506	0.128315	0.116398	0.113842
ATGTTAAG	336	214	253	117	920			ATGTTAAG	0.128141	0.083507	0.145577	0.0965857	0.113105
AATAGAAT	296	236	237	146	915			AATAGAAT	0.112886	0.0920918	0.136371	0.120526	0.11249
AATCTAAT	303	249	248	115	915			AATCTAAT	0.115555	0.0971647	0.1427	0.0949346	0.11249
AATTGAAA	296	292	228	99	915			AATTGAAA	0.112886	0.113944	0.131192	0.0817263	0.11249
AGATGAAT	312	196	298	109	915			AGATGAAT	0.118988	0.076483	0.17147	0.0899815	0.11249
AATAAAAG	279	302	210	122	913			AATAAAAG	0.106402	0.117846	0.120835	0.100713	0.112244
AAATCAAG	257	339	161	155	912			AAATCAAG	0.0980123	0.132284	0.09264	0.127955	0.112121
AAAGTAAT	269	283	244	114	910			AAAGTAAT	0.102589	0.110432	0.140399	0.0941091	0.111875
AAAGGAAA	269	368	157	113	907			AAAGGAAA	0.102589	0.143601	0.0903384	0.0932836	0.111507
ACGAAAAT	279	356	165	101	901			ACGAAAAT	0.106402	0.138918	0.0949416	0.0833774	0.110769
ACGTTAAT	293	187	284	123	887			ACGTTAAT	0.111742	0.0729711	0.163415	0.101539	0.109048
ATCATAAT	344	181	285	77	887			ATCATAAT	0.131192	0.0706297	0.16399	0.0635649	0.109048
ATACAAAG	258	356	163	109	886			ATACAAAG	0.0983937	0.138918	0.0937908	0.0899815	0.108925
AGCCAAAT	225	427	122	108	882			AGCCAAAT	0.0858084	0.166624	0.0701993	0.089156	0.108433
ATAAGAAT	298	227	249	108	882			ATAAGAAT	0.113648	0.0885798	0.143276	0.089156	0.108433
ACGCAAAG	257	417	106	98	878			ACGCAAAG	0.0980123	0.162722	0.0609928	0.0809008	0.107941
ATTTTAAG	282	247	227	122	878			ATTTTAAG	0.107547	0.0963842	0.130617	0.100713	0.107941
ATTCGAAT	307	205	238	123	873			ATTCGAAT	0.117081	0.079995	0.136946	0.101539	0.107327
AACATAAT	351	132	302	86	871			AACATAAT	0.133861	0.051509	0.173772	0.0709946	0.107081
AAGTAAAA	282	337	168	84	871			AAGTAAAA	0.107547	0.131504	0.0966678	0.0693435	0.107081
AGGGGAAT	289	228	211	133	861			AGGGGAAT	0.110216	0.0889701	0.12141	0.109794	0.105851
ACGGAAAT	228	364	172	96	860			ACGGAAAT	0.0869525	0.14204	0.0989695	0.0792498	0.105728
ATAGTAAT	304	180	258	105	847			ATAGTAAT	0.115937	0.0702395	0.148454	0.0866794	0.10413
ATATCAAT	306	206	241	94	847			ATATCAAT	0.116699	0.0803852	0.138672	0.0775987	0.10413
ATAGGAAT	257	230	230	129	846			ATAGGAAT	0.0980123	0.0897505	0.132343	0.106492	0.104007
AAAGAAAA	259	339	155	84	837			AAAGAAAA	0.098775	0.132284	0.0891876	0.0693435	0.102901
ATAAGAAA	263	302	166	100	831			ATAAGAAA	0.100301	0.117846	0.095517	0.0825518	0.102163
ATGGGAAA	257	303	174	95	829			ATGGGAAA	0.0980123	0.118237	0.10012	0.0784243	0.101917
ACGGTAAT	258	190	248	132	828			ACGGTAAT	0.0983937	0.0741417	0.1427	0.108968	0.101794
AGGAAAAG	263	340	139	85	827			AGGAAAAG	0.100301	0.132675	0.0799811	0.0701691	0.101671
ATGAGAAT	264	201	233	129	827			ATGAGAAT	0.100682	0.0784341	0.134069	0.106492	0.101671
AATATAAG	265	227	213	117	822			AATATAAG	0.101063	0.0885798	0.122561	0.0965857	0.101057
AAGGGAAT	302	196	210	110	818			AAGGGAAT	0.115174	0.076483	0.120835	0.090807	0.100565
AGGCAAAC	227	403	89	99	818			AGGCAAAC	0.0865712	0.157258	0.0512109	0.0817263	0.100565
AAAAGAAA	279	305	146	85	815			AAAAGAAA	0.106402	0.119017	0.084009	0.0701691	0.100196
AAACTAAT	272	207	224	112	815			AAACTAAT	0.103733	0.0807754	0.12889	0.0924581	0.100196
AGTGGAAT	261	217	211	126	815			AGTGGAAT	0.0995378	0.0846776	0.12141	0.104015	0.100196
AAAGGAAT	250	231	216	112	809			AAAGGAAT	0.0953427	0.0901407	0.124287	0.0924581	0.0994584
AATGTAAG	274	228	184	116	802			AATGTAAG	0.104496	0.0889701	0.105874	0.0957601	0.0985979
AATCAAAG	224	313	149	111	797			AATCAAAG	0.0854271	0.122139	0.0857352	0.0916325	0.0979832
AGGTGAAT	282	182	206	123	793			AGGTGAAT	0.107547	0.07102	0.118533	0.101539	0.0974914
AAAAAAAG	242	285	163	102	792			AAAAAAAG	0.0922917	0.111213	0.0937908	0.0842029	0.0973685
ATATAAAA	271	259	177	85	792			ATATAAAA	0.103351	0.101067	0.101846	0.0701691	0.0973685
AGGGGAAA	265	280	138	100	783			AGGGGAAA	0.101063	0.109261	0.0794057	0.0825518	0.096262
ATAACAAA	257	257	158	107	779			ATAACAAA	0.0980123	0.100286	0.0909138	0.0883305	0.0957702
ATTAAAAC	284	194	212	87	777			ATTAAAAC	0.108309	0.0757026	0.121986	0.0718201	0.0955244
AAGTGAAT	275	204	213	81	773			AAGTGAAT	0.104877	0.0796048	0.122561	0.066867	0.0950326
AATCTAAA	280	186	225	81	772			AATCTAAA	0.106784	0.0725808	0.129466	0.066867	0.0949097
ATCAAAAT	249	271	162	90	772			ATCAAAAT	0.0949613	0.105749	0.0932154	0.0742967	0.0949097
ATGGTAAG	258	182	221	109	770			ATGGTAAG	0.0983937	0.07102	0.127164	0.0899815	0.0946638
AAAGTAAA	259	293	124	92	768			AAAGTAAA	0.098775	0.114334	0.0713501	0.0759477	0.0944179
ACATAAAA	271	187	198	112	768			ACATAAAA	0.103351	0.0729711	0.11393	0.0924581	0.0944179
ATAAAAAG	240	237	198	89	764			ATAAAAAG	0.091529	0.092482	0.11393	0.0734711	0.0939261
ACTCAAAT	233	325	106	93	757			ACTCAAAT	0.0888594	0.126821	0.0609928	0.0767732	0.0930656
AGCAAAAT	268	275	122	92	757			AGCAAAAT	0.102207	0.10731	0.0701993	0.0759477	0.0930656
AAGAAAAA	245	270	160	81	756			AAGAAAAA	0.0934358	0.105359	0.0920646	0.066867	0.0929426
ATTGGAAA	243	282	138	89	752			ATTGGAAA	0.0926731	0.110042	0.0794057	0.0734711	0.0924509
AGAAAAAT	248	236	154	109	747			AGAAAAAT	0.09458	0.0920918	0.0886122	0.0899815	0.0918362
ACAAAAAT	246	291	116	93	746			ACAAAAAT	0.0938172	0.113554	0.0667468	0.0767732	0.0917132
AGTGCAAA	229	322	103	90	744			AGTGCAAA	0.0873339	0.125651	0.0592666	0.0742967	0.0914674
ATAAAAAA	261	211	174	97	743			ATAAAAAA	0.0995378	0.0823363	0.10012	0.0800753	0.0913444
ATTAGAAA	261	189	184	108	742			ATTAGAAA	0.0995378	0.0737515	0.105874	0.089156	0.0912215
ATGATAAA	272	165	228	75	740			ATGATAAA	0.103733	0.0643862	0.131192	0.0619139	0.0909756
AACAAAAA	218	310	115	88	731			AACAAAAA	0.0831388	0.120968	0.0661714	0.0726456	0.0898691
AATGCAAT	226	228	165	111	730			AATGCAAT	0.0861898	0.0889701	0.0949416	0.0916325	0.0897462
ATTTCAAA	227	263	148	91	729			ATTTCAAA	0.0865712	0.102628	0.0851598	0.0751222	0.0896233
ACATTAAA	273	160	218	74	725			ACATTAAA	0.104114	0.0624351	0.125438	0.0610884	0.0891315
AGTTGAAT	243	171	207	101	722			AGTTGAAT	0.0926731	0.0667275	0.119109	0.0833774	0.0887627
AGATTAAA	276	166	191	86	719			AGATTAAA	0.105258	0.0647764	0.109902	0.0709946	0.0883939
ATCAGAAT	223	199	202	95	719			ATCAGAAT	0.0850457	0.0776537	0.116232	0.0784243	0.0883939
AAAAGAAT	225	240	153	99	717			AAAAGAAT	0.0858084	0.0936527	0.0880368	0.0817263	0.088148
ACGCTAAT	282	118	243	74	717			ACGCTAAT	0.107547	0.0460459	0.139823	0.0610884	0.088148
AAATCAAC	199	246	160	111	716			AAATCAAC	0.0758928	0.095994	0.0920646	0.0916325	0.088025
AGGTAAAG	210	296	123	86	715			AGGTAAAG	0.0800879	0.115505	0.0707747	0.0709946	0.0879021
ATAGAAAT	205	225	167	108	705			ATAGAAAT	0.078181	0.0877994	0.0960924	0.089156	0.0866727
AACTTAAT	261	157	204	82	704			AACTTAAT	0.0995378	0.0612645	0.117382	0.0676925	0.0865498
AAGCTAAT	254	135	237	78	704			AAGCTAAT	0.0968682	0.0526796	0.136371	0.0643904	0.0865498
AATTCAAG	265	183	154	99	701			AATTCAAG	0.101063	0.0714102	0.0886122	0.0817263	0.0861809
AATCGAAT	228	200	161	111	700			AATCGAAT	0.0869525	0.0780439	0.09264	0.0916325	0.086058
AAGCAAAG	222	321	87	65	695			AAGCAAAG	0.0846643	0.12526	0.0500601	0.0536587	0.0854433
ATTACAAA	241	205	166	83	695			ATTACAAA	0.0919104	0.079995	0.095517	0.068518	0.0854433
AACATAAA	266	135	217	76	694			AACATAAA	0.101445	0.0526796	0.124863	0.0627394	0.0853204
ACATAAAG	245	170	187	92	694			ACATAAAG	0.0934358	0.0663373	0.107601	0.0759477	0.0853204
AGTTTAAA	231	207	163	91	692			AGTTTAAA	0.0880967	0.0807754	0.0937908	0.0751222	0.0850745
AAGTTAAA	225	231	149	86	691			AAGTTAAA	0.0858084	0.0901407	0.0857352	0.0709946	0.0849515
AGTAAAAA	239	263	118	70	690			AGTAAAAA	0.0911476	0.102628	0.0678976	0.0577863	0.0848286
ACGATAAT	235	137	213	103	688			ACGATAAT	0.0896221	0.0534601	0.122561	0.0850284	0.0845827
AGAGGAAT	217	167	200	104	688			AGAGGAAT	0.0827575	0.0651667	0.115081	0.0858539	0.0845827
AGCATAAG	275	113	224	76	688			AGCATAAG	0.104877	0.0440948	0.12889	0.0627394	0.0845827
ATTCTAAA	248	139	213	88	688			ATTCTAAA	0.09458	0.0542405	0.122561	0.0726456	0.0845827
ATGGCAAA	203	289	99	94	685			ATGGCAAA	0.0774183	0.112773	0.056965	0.0775987	0.0842139
AATACAAT	209	170	186	119	684			AATACAAT	0.0797065	0.0663373	0.107025	0.0982367	0.084091
AGCAAAAA	218	283	105	78	684			AGCAAAAA	0.0831388	0.110432	0.0604174	0.0643904	0.084091
AGTGTAAT	223	174	181	105	683			AGTGTAAT	0.0850457	0.0678982	0.104148	0.0866794	0.083968
ATACGAAT	238	176	175	92	681			ATACGAAT	0.0907663	0.0686786	0.100696	0.0759477	0.0837221
ATTGAAAA	236	237	132	76	681			ATTGAAAA	0.0900035	0.092482	0.0759533	0.0627394	0.0837221
ATGGAAAC	211	282	107	80	680			ATGGAAAC	0.0804692	0.110042	0.0615682	0.0660415	0.0835992
ATCGTAAT	223	174	188	93	678			ATCGTAAT	0.0850457	0.0678982	0.108176	0.0767732	0.0833533
AATAGAAA	199	220	169	86	674			AATAGAAA	0.0758928	0.0858483	0.0972432	0.0709946	0.0828616
ACATAAAC	228	167	184	91	670			ACATAAAC	0.0869525	0.0651667	0.105874	0.0751222	0.0823698
ATATCAAA	230	211	140	88	669			ATATCAAA	0.0877153	0.0823363	0.0805565	0.0726456	0.0822469
AATGAAAG	197	231	153	87	668			AATGAAAG	0.07513	0.0901407	0.0880368	0.0718201	0.0821239
ATGATAAG	221	183	171	93	668			ATGATAAG	0.0842829	0.0714102	0.098394	0.0767732	0.0821239
AATGGAAG	266	165	132	96	659			AATGGAAG	0.101445	0.0643862	0.0759533	0.0792498	0.0810175
AACTGAAT	232	144	188	89	653			AACTGAAT	0.088478	0.0561916	0.108176	0.0734711	0.0802798
AGTCAAAC	200	313	73	66	652			AGTCAAAC	0.0762742	0.122139	0.0420045	0.0544842	0.0801569
AATAAAAC	197	194	168	88	647			AATAAAAC	0.07513	0.0757026	0.0966678	0.0726456	0.0795422
ACTTAAAT	201	183	192	69	645			ACTTAAAT	0.0766555	0.0714102	0.110478	0.0569608	0.0792963
ATGTCAAT	217	185	151	90	643			ATGTCAAT	0.0827575	0.0721906	0.086886	0.0742967	0.0790504
AGTTAAAA	204	213	159	65	641			AGTTAAAA	0.0777996	0.0831168	0.0914892	0.0536587	0.0788045
ATGCGAAA	219	166	161	90	636			ATGCGAAA	0.0835202	0.0647764	0.09264	0.0742967	0.0781898
AGTGAAAA	183	245	119	83	630			AGTGAAAA	0.0697909	0.0956038	0.0684731	0.068518	0.0774522
ATTCCAAT	201	146	192	91	630			ATTCCAAT	0.0766555	0.0569721	0.110478	0.0751222	0.0774522
ACTTGAAT	217	157	167	86	627			ACTTGAAT	0.0827575	0.0612645	0.0960924	0.0709946	0.0770834
AGAAAAAA	201	208	149	68	626			AGAAAAAA	0.0766555	0.0811657	0.0857352	0.0561353	0.0769604
AGGGTAAA	185	174	149	117	625			AGGGTAAA	0.0705536	0.0678982	0.0857352	0.0965857	0.0768375
AAAATAAC	205	209	121	89	624			AAAATAAC	0.078181	0.0815559	0.0696239	0.0734711	0.0767146
AGATAAAT	234	158	154	76	622			AGATAAAT	0.0892408	0.0616547	0.0886122	0.0627394	0.0764687
AAAACAAT	193	234	105	89	621			AAAACAAT	0.0736046	0.0913114	0.0604174	0.0734711	0.0763457
ATTTTAAC	213	167	160	79	619			ATTTTAAC	0.081232	0.0651667	0.0920646	0.065216	0.0760999
ACTTTAAT	216	143	179	80	618			ACTTTAAT	0.0823761	0.0558014	0.102997	0.0660415	0.0759769
ACGTGAAT	192	143	186	95	616			ACGTGAAT	0.0732232	0.0558014	0.107025	0.0784243	0.075731
ATGAGAAA	198	189	133	96	616			ATGAGAAA	0.0755114	0.0737515	0.0765287	0.0792498	0.075731
AAGAAAAG	192	232	110	79	613			AAGAAAAG	0.0732232	0.0905309	0.0632944	0.065216	0.0753622
ATTAGAAG	206	150	176	80	612			ATTAGAAG	0.0785624	0.0585329	0.101271	0.0660415	0.0752393
AACGTAAA	214	216	111	70	611			AACGTAAA	0.0816134	0.0842874	0.0638698	0.0577863	0.0751163
ATGAAAAC	188	245	105	71	609			ATGAAAAC	0.0716977	0.0956038	0.0604174	0.0586118	0.0748705
AAACGAAT	201	173	136	96	606			AAACGAAT	0.0766555	0.067508	0.0782549	0.0792498	0.0745016
AAAGTAAG	168	218	119	101	606			AAAGTAAG	0.0640703	0.0850679	0.0684731	0.0833774	0.0745016
ACATTAAC	258	103	200	44	605			ACATTAAC	0.0983937	0.0401926	0.115081	0.0363228	0.0743787
ATAATAAC	229	127	175	73	604			ATAATAAC	0.0873339	0.0495579	0.100696	0.0602628	0.0742558
AAACAAAC	173	280	88	62	603			AAACAAAC	0.0659771	0.109261	0.0506355	0.0511821	0.0741328
ATTATAAC	187	149	196	69	601			ATTATAAC	0.0713163	0.0581427	0.112779	0.0569608	0.0738869
ACATTAAG	249	138	152	59	598			ACATTAAG	0.0949613	0.0538503	0.0874614	0.0487056	0.0735181
AGTAGAAT	188	148	155	100	591			AGTAGAAT	0.0716977	0.0577525	0.0891876	0.0825518	0.0726575
ATTTGAAG	187	233	105	66	591			ATTTGAAG	0.0713163	0.0909212	0.0604174	0.0544842	0.0726575
AGAGAAAT	178	193	123	95	589			AGAGAAAT	0.067884	0.0753124	0.0707747	0.0784243	0.0724117
AACTAAAT	204	171	141	72	588			AACTAAAT	0.0777996	0.0667275	0.0811319	0.0594373	0.0722887
ATAGAAAA	201	178	134	75	588			ATAGAAAA	0.0766555	0.0694591	0.0771041	0.0619139	0.0722887
AAGAGAAT	191	189	140	67	587			AAGAGAAT	0.0728418	0.0737515	0.0805565	0.0553097	0.0721658
AGGAGAAT	207	160	134	85	586			AGGAGAAT	0.0789438	0.0624351	0.0771041	0.0701691	0.0720428
ACATGAAA	176	211	123	75	585			ACATGAAA	0.0671213	0.0823363	0.0707747	0.0619139	0.0719199
AAAGAAAG	178	205	125	75	583			AAAGAAAG	0.067884	0.079995	0.0719255	0.0619139	0.071674
AGACTAAT	195	130	177	80	582			AGACTAAT	0.0743673	0.0507285	0.101846	0.0660415	0.0715511
ATGTCAAA	195	191	117	79	582			ATGTCAAA	0.0743673	0.0745319	0.0673222	0.065216	0.0715511
ATTCTAAG	196	152	149	85	582			ATTCTAAG	0.0747487	0.0593134	0.0857352	0.0701691	0.0715511
AACGAAAT	195	173	136	77	581			AACGAAAT	0.0743673	0.067508	0.0782549	0.0635649	0.0714281
ATACGAAA	183	179	135	84	581			ATACGAAA	0.0697909	0.0698493	0.0776795	0.0693435	0.0714281
ATCGGAAT	188	149	151	93	581			ATCGGAAT	0.0716977	0.0581427	0.086886	0.0767732	0.0714281
AGTAAAAG	160	234	115	70	579			AGTAAAAG	0.0610193	0.0913114	0.0661714	0.0577863	0.0711823
AACGGAAT	183	154	165	76	578			AACGGAAT	0.0697909	0.0600938	0.0949416	0.0627394	0.0710593
ATCAAAAA	160	218	122	77	577			ATCAAAAA	0.0610193	0.0850679	0.0701993	0.0635649	0.0709364
AGAATAAG	180	135	176	85	576			AGAATAAG	0.0686467	0.0526796	0.101271	0.0701691	0.0708134
ATGAGAAG	186	167	153	67	573			ATGAGAAG	0.070935	0.0651667	0.0880368	0.0553097	0.0704446
AACGTAAT	202	140	143	86	571			AACGTAAT	0.0770369	0.0546307	0.0822827	0.0709946	0.0701987
ACAATAAT	204	132	170	64	570			ACAATAAT	0.0777996	0.051509	0.0978186	0.0528332	0.0700758
AAGTGAAA	189	202	102	76	569			AAGTGAAA	0.0720791	0.0788243	0.0586912	0.0627394	0.0699529
ACTAAAAT	211	170	124	64	569			ACTAAAAT	0.0804692	0.0663373	0.0713501	0.0528332	0.0699529
ACTGGAAT	194	143	133	99	569			ACTGGAAT	0.0739859	0.0558014	0.0765287	0.0817263	0.0699529
ATATAAAG	190	153	153	73	569			ATATAAAG	0.0724605	0.0597036	0.0880368	0.0602628	0.0699529
ATGTGAAA	176	176	130	87	569			ATGTGAAA	0.0671213	0.0686786	0.0748025	0.0718201	0.0699529
ACGCAAAC	161	265	76	62	564			ACGCAAAC	0.0614007	0.103408	0.0437307	0.0511821	0.0693382
AGGGAAAC	170	254	90	50	564			AGGGAAAC	0.064833	0.0991158	0.0517863	0.0412759	0.0693382
AAAACAAG	168	223	75	91	557			AAAACAAG	0.0640703	0.087019	0.0431553	0.0751222	0.0684776
AAAAGAAG	165	174	132	86	557			AAAAGAAG	0.0629262	0.0678982	0.0759533	0.0709946	0.0684776
ACTTTAAA	187	167	142	60	556			ACTTTAAA	0.0713163	0.0651667	0.0817073	0.0495311	0.0683546
ATGGGAAG	171	175	121	89	556			ATGGGAAG	0.0652144	0.0682884	0.0696239	0.0734711	0.0683546
AACAAAAC	154	253	71	77	555			AACAAAAC	0.0587311	0.0987255	0.0408537	0.0635649	0.0682317
ATCGAAAT	182	199	110	62	553			ATCGAAAT	0.0694095	0.0776537	0.0632944	0.0511821	0.0679858
ATATGAAG	143	177	143	89	552			ATATGAAG	0.054536	0.0690689	0.0822827	0.0734711	0.0678629
ACAAAAAA	172	207	108	64	551			ACAAAAAA	0.0655958	0.0807754	0.0621436	0.0528332	0.0677399
ATGCCAAT	170	156	149	76	551			ATGCCAAT	0.064833	0.0608742	0.0857352	0.0627394	0.0677399
ATGTTAAC	169	148	163	71	551			ATGTTAAC	0.0644517	0.0577525	0.0937908	0.0586118	0.0677399
ATTCGAAA	190	155	136	70	551			ATTCGAAA	0.0724605	0.060484	0.0782549	0.0577863	0.0677399
AGATTAAG	172	149	153	75	549			AGATTAAG	0.0655958	0.0581427	0.0880368	0.0619139	0.0674941
ATAGTAAG	166	168	140	75	549			ATAGTAAG	0.0633076	0.0655569	0.0805565	0.0619139	0.0674941
AGAGGAAA	181	176	116	75	548			AGAGGAAA	0.0690281	0.0686786	0.0667468	0.0619139	0.0673711
AGATTAAC	232	106	150	60	548			AGATTAAC	0.088478	0.0413633	0.0863106	0.0495311	0.0673711
ATAGCAAA	195	200	96	55	546			ATAGCAAA	0.0743673	0.0780439	0.0552388	0.0454035	0.0671252
AGGAAAAC	155	215	96	77	543			AGGAAAAC	0.0591125	0.0838972	0.0552388	0.0635649	0.0667564
AGTATAAA	195	150	139	58	542			AGTATAAA	0.0743673	0.0585329	0.0799811	0.0478801	0.0666335
ACGTAAAA	170	211	92	65	538			ACGTAAAA	0.064833	0.0823363	0.0529371	0.0536587	0.0661417
ACCATAAT	215	94	168	60	537			ACCATAAT	0.0819947	0.0366806	0.0966678	0.0495311	0.0660188
ATCATAAA	193	109	164	71	537			ATCATAAA	0.0736046	0.0425339	0.0943662	0.0586118	0.0660188
ATCCTAAT	161	128	164	84	537			ATCCTAAT	0.0614007	0.0499481	0.0943662	0.0693435	0.0660188
AATGCAAG	176	192	89	78	535			AATGCAAG	0.0671213	0.0749222	0.0512109	0.0643904	0.0657729
ACGGGAAT	168	147	126	92	533			ACGGGAAT	0.0640703	0.0573623	0.0725009	0.0759477	0.065527
ATACAAAC	170	210	89	64	533			ATACAAAC	0.064833	0.0819461	0.0512109	0.0528332	0.065527
AGGATAAA	144	156	145	87	532			AGGATAAA	0.0549174	0.0608742	0.0834335	0.0718201	0.0654041
ATAACAAT	163	127	153	89	532			ATAACAAT	0.0621634	0.0495579	0.0880368	0.0734711	0.0654041
AATTGAAG	181	160	126	63	530			AATTGAAG	0.0690281	0.0624351	0.0725009	0.0520077	0.0651582
ATCTCAAT	147	143	147	93	530			ATCTCAAT	0.0560615	0.0558014	0.0845844	0.0767732	0.0651582
AGCTAAAT	171	189	110	58	528			AGCTAAAT	0.0652144	0.0737515	0.0632944	0.0478801	0.0649123
AGGCGAAT	162	152	120	90	524			AGGCGAAT	0.0617821	0.0593134	0.0690485	0.0742967	0.0644206
ATACTAAA	170	128	154	72	524			ATACTAAA	0.064833	0.0499481	0.0886122	0.0594373	0.0644206
AAGGAAAG	151	203	91	78	523			AAGGAAAG	0.057587	0.0792146	0.0523617	0.0643904	0.0642976
AGCTTAAT	169	115	169	70	523			AGCTTAAT	0.0644517	0.0448752	0.0972432	0.0577863	0.0642976
AAGTCAAT	175	137	127	82	521			AAGTCAAT	0.0667399	0.0534601	0.0730763	0.0676925	0.0640517
AAGCAAAC	159	225	67	69	520			AAGCAAAC	0.060638	0.0877994	0.0385521	0.0569608	0.0639288
AGATGAAA	165	184	97	74	520			AGATGAAA	0.0629262	0.0718004	0.0558142	0.0610884	0.0639288
AAAAAAAC	153	201	103	62	519			AAAAAAAC	0.0583497	0.0784341	0.0592666	0.0511821	0.0638059
AATTCAAC	181	151	123	62	517			AATTCAAC	0.0690281	0.0589232	0.0707747	0.0511821	0.06356
ATAAGAAG	161	144	134	77	516			ATAAGAAG	0.0614007	0.0561916	0.0771041	0.0635649	0.063437
AATACAAG	167	173	115	58	513			AATACAAG	0.0636889	0.067508	0.0661714	0.0478801	0.0630682
ATATAAAC	167	141	125	79	512			ATATAAAC	0.0636889	0.055021	0.0719255	0.065216	0.0629453
AAAGGAAG	147	173	106	85	511			AAAGGAAG	0.0560615	0.067508	0.0609928	0.0701691	0.0628223
AGACAAAA	177	207	85	39	508			AGACAAAA	0.0675026	0.0807754	0.0489093	0.0321952	0.0624535
AGCGGAAT	163	140	126	77	506			AGCGGAAT	0.0621634	0.0546307	0.0725009	0.0635649	0.0622076
AGTGTAAA	151	176	116	63	506			AGTGTAAA	0.057587	0.0686786	0.0667468	0.0520077	0.0622076
AGAGAAAA	184	147	113	61	505			AGAGAAAA	0.0701722	0.0573623	0.0650206	0.0503566	0.0620847
AGGTAAAC	140	203	97	65	505			AGGTAAAC	0.0533919	0.0792146	0.0558142	0.0536587	0.0620847
AACGGAAA	147	190	96	68	501			AACGGAAA	0.0560615	0.0741417	0.0552388	0.0561353	0.0615929
ATTGAAAG	158	162	105	74	499			ATTGAAAG	0.0602566	0.0632156	0.0604174	0.0610884	0.0613471
AGAGTAAT	170	128	135	65	498			AGAGTAAT	0.064833	0.0499481	0.0776795	0.0536587	0.0612241
AATATAAC	131	151	142	70	494			AATATAAC	0.0499596	0.0589232	0.0817073	0.0577863	0.0607324
AAGTTAAG	149	138	129	77	493			AAGTTAAG	0.0568242	0.0538503	0.0742271	0.0635649	0.0606094
ATAGGAAG	151	150	121	68	490			ATAGGAAG	0.057587	0.0585329	0.0696239	0.0561353	0.0602406
ATGCTAAC	176	89	165	60	490			ATGCTAAC	0.0671213	0.0347295	0.0949416	0.0495311	0.0602406
AACAGAAT	169	130	118	72	489			AACAGAAT	0.0644517	0.0507285	0.0678976	0.0594373	0.0601177
ACAGGAAT	163	122	119	85	489			ACAGGAAT	0.0621634	0.0476068	0.0684731	0.0701691	0.0601177
AGAAGAAT	135	153	128	73	489			AGAAGAAT	0.0514851	0.0597036	0.0736517	0.0602628	0.0601177
ATAAAAAC	173	144	110	60	487			ATAAAAAC	0.0659771	0.0561916	0.0632944	0.0495311	0.0598718
AGCATAAC	215	53	172	46	486			AGCATAAC	0.0819947	0.0206816	0.0989695	0.0379738	0.0597488
ATTTGAAC	130	191	97	67	485			ATTTGAAC	0.0495782	0.0745319	0.0558142	0.0553097	0.0596259
AATCAAAC	138	196	99	49	482			AATCAAAC	0.0526292	0.076483	0.056965	0.0404504	0.0592571
AGGTTAAA	143	148	127	63	481			AGGTTAAA	0.054536	0.0577525	0.0730763	0.0520077	0.0591341
AAGTAAAG	143	176	94	66	479			AAGTAAAG	0.054536	0.0686786	0.054088	0.0544842	0.0588883
ACAGGAAA	138	180	88	73	479			ACAGGAAA	0.0526292	0.0702395	0.0506355	0.0602628	0.0588883
ATCCGAAT	142	127	130	80	479			ATCCGAAT	0.0541547	0.0495579	0.0748025	0.0660415	0.0588883
AAACCAAA	141	195	88	54	478			AAACCAAA	0.0537733	0.0760928	0.0506355	0.044578	0.0587653
AGTGGAAA	142	184	89	63	478			AGTGGAAA	0.0541547	0.0718004	0.0512109	0.0520077	0.0587653
AAGATAAA	163	150	115	49	477			AAGATAAA	0.0621634	0.0585329	0.0661714	0.0404504	0.0586424
ATCGCAAA	135	209	83	50	477			ATCGCAAA	0.0514851	0.0815559	0.0477585	0.0412759	0.0586424
ATTGTAAG	133	152	119	72	476			ATTGTAAG	0.0507223	0.0593134	0.0684731	0.0594373	0.0585194
ATCTTAAA	170	132	96	77	475			ATCTTAAA	0.064833	0.051509	0.0552388	0.0635649	0.0583965
AAACGAAA	149	165	97	63	474			AAACGAAA	0.0568242	0.0643862	0.0558142	0.0520077	0.0582736
AACAAAAG	137	190	90	55	472			AACAAAAG	0.0522478	0.0741417	0.0517863	0.0454035	0.0580277
AATCTAAG	145	159	102	66	472			AATCTAAG	0.0552988	0.0620449	0.0586912	0.0544842	0.0580277
ATGACAAA	163	138	111	58	470			ATGACAAA	0.0621634	0.0538503	0.0638698	0.0478801	0.0577818
AGTTAAAG	143	164	98	64	469			AGTTAAAG	0.054536	0.063996	0.0563896	0.0528332	0.0576589
ACTGTAAT	150	119	137	61	467			ACTGTAAT	0.0572056	0.0464361	0.0788303	0.0503566	0.057413
ATCCAAAA	155	185	72	54	466			ATCCAAAA	0.0591125	0.0721906	0.0414291	0.044578	0.05729
AACATAAG	182	105	127	48	462			AACATAAG	0.0694095	0.0409731	0.0730763	0.0396249	0.0567983
AATCGAAA	163	157	89	53	462			AATCGAAA	0.0621634	0.0612645	0.0512109	0.0437525	0.0567983
AGGGGAAG	146	130	117	69	462			AGGGGAAG	0.0556801	0.0507285	0.0673222	0.0569608	0.0567983
ATGGCAAT	143	124	125	70	462			ATGGCAAT	0.054536	0.0483872	0.0719255	0.0577863	0.0567983
AGCAAAAC	126	203	78	54	461			AGCAAAAC	0.0480527	0.0792146	0.0448815	0.044578	0.0566753
ATTACAAG	135	123	152	50	460			ATTACAAG	0.0514851	0.047997	0.0874614	0.0412759	0.0565524
AGGGCAAA	149	173	81	56	459			AGGGCAAA	0.0568242	0.067508	0.0466077	0.046229	0.0564295
AGTCGAAT	160	120	105	74	459			AGTCGAAT	0.0610193	0.0468263	0.0604174	0.0610884	0.0564295
ACAGTAAT	161	104	126	67	458			ACAGTAAT	0.0614007	0.0405828	0.0725009	0.0553097	0.0563065
AAGACAAA	141	181	82	53	457			AAGACAAA	0.0537733	0.0706297	0.0471831	0.0437525	0.0561836
AGCGTAAT	155	98	130	74	457			AGCGTAAT	0.0591125	0.0382415	0.0748025	0.0610884	0.0561836
ATCTAAAA	148	137	91	81	457			ATCTAAAA	0.0564429	0.0534601	0.0523617	0.066867	0.0561836
ACAAAAAG	144	175	85	52	456			ACAAAAAG	0.0549174	0.0682884	0.0489093	0.042927	0.0560606
ACCTTAAT	165	107	118	66	456			ACCTTAAT	0.0629262	0.0417535	0.0678976	0.0544842	0.0560606
AGCTGAAT	147	126	126	57	456			AGCTGAAT	0.0560615	0.0491677	0.0725009	0.0470546	0.0560606
AGGGTAAG	132	136	94	94	456			AGGGTAAG	0.0503409	0.0530699	0.054088	0.0775987	0.0560606
AACCAAAA	137	193	78	47	455			AACCAAAA	0.0522478	0.0753124	0.0448815	0.0387994	0.0559377
AATAGAAG	140	143	102	69	454			AATAGAAG	0.0533919	0.0558014	0.0586912	0.0569608	0.0558148
ACTATAAT	156	121	130	47	454			ACTATAAT	0.0594938	0.0472166	0.0748025	0.0387994	0.0558148
ATGACAAT	151	116	128	57	452			ATGACAAT	0.057587	0.0452655	0.0736517	0.0470546	0.0555689
AATGTAAC	155	118	111	66	450			AATGTAAC	0.0591125	0.0460459	0.0638698	0.0544842	0.055323
AGAAGAAA	133	141	119	57	450			AGAAGAAA	0.0507223	0.055021	0.0684731	0.0470546	0.055323
AGATAAAA	142	153	99	56	450			AGATAAAA	0.0541547	0.0597036	0.056965	0.046229	0.055323
AGGTCAAT	146	112	115	77	450			AGGTCAAT	0.0556801	0.0437046	0.0661714	0.0635649	0.055323
AGGTTAAG	137	139	111	63	450			AGGTTAAG	0.0522478	0.0542405	0.0638698	0.0520077	0.055323
ATGCGAAG	141	134	105	69	449			ATGCGAAG	0.0537733	0.0522894	0.0604174	0.0569608	0.0552001
AGCGAAAT	138	126	109	75	448			AGCGAAAT	0.0526292	0.0491677	0.062719	0.0619139	0.0550771
AGGTGAAA	154	154	81	57	446			AGGTGAAA	0.0587311	0.0600938	0.0466077	0.0470546	0.0548312
AATCCAAT	133	155	96	61	445			AATCCAAT	0.0507223	0.060484	0.0552388	0.0503566	0.0547083
ATTGCAAT	147	134	106	58	445			ATTGCAAT	0.0560615	0.0522894	0.0609928	0.0478801	0.0547083
AACCTAAT	140	99	152	53	444			AACCTAAT	0.0533919	0.0386317	0.0874614	0.0437525	0.0545854
ACAGAAAT	149	121	110	61	441			ACAGAAAT	0.0568242	0.0472166	0.0632944	0.0503566	0.0542165
AGGAGAAA	150	138	94	57	439			AGGAGAAA	0.0572056	0.0538503	0.054088	0.0470546	0.0539707
AGTAGAAA	134	119	123	63	439			AGTAGAAA	0.0511037	0.0464361	0.0707747	0.0520077	0.0539707
AGTTTAAG	131	133	114	61	439			AGTTTAAG	0.0499596	0.0518992	0.065596	0.0503566	0.0539707
AACGAAAA	137	153	92	56	438			AACGAAAA	0.0522478	0.0597036	0.0529371	0.046229	0.0538477
ATATCAAG	168	116	96	58	438			ATATCAAG	0.0640703	0.0452655	0.0552388	0.0478801	0.0538477
AGGTCAAA	154	162	70	51	437			AGGTCAAA	0.0587311	0.0632156	0.0402783	0.0421014	0.0537248
ATTTCAAG	142	141	86	68	437			ATTTCAAG	0.0541547	0.055021	0.0494847	0.0561353	0.0537248
AAACTAAG	127	163	83	63	436			AAACTAAG	0.0484341	0.0636058	0.0477585	0.0520077	0.0536018
ACTAGAAT	124	151	106	53	434			ACTAGAAT	0.04729	0.0589232	0.0609928	0.0437525	0.053356
ATCGTAAA	145	136	96	57	434			ATCGTAAA	0.0552988	0.0530699	0.0552388	0.0470546	0.053356
AGAGTAAA	148	155	67	62	432			AGAGTAAA	0.0564429	0.060484	0.0385521	0.0511821	0.0531101
AATCCAAA	133	186	67	45	431			AATCCAAA	0.0507223	0.0725808	0.0385521	0.0371483	0.0529871
ATTCGAAG	148	119	114	49	430			ATTCGAAG	0.0564429	0.0464361	0.065596	0.0404504	0.0528642
ACCCAAAT	125	193	68	43	429			ACCCAAAT	0.0476713	0.0753124	0.0391275	0.0354973	0.0527413
ACTGAAAT	137	121	111	60	429			ACTGAAAT	0.0522478	0.0472166	0.0638698	0.0495311	0.0527413
AAGGCAAT	136	146	85	60	427			AAGGCAAT	0.0518664	0.0569721	0.0489093	0.0495311	0.0524954
ACAAAAAC	128	181	69	49	427			ACAAAAAC	0.0488155	0.0706297	0.0397029	0.0404504	0.0524954
ACTTAAAA	154	119	91	63	427			ACTTAAAA	0.0587311	0.0464361	0.0523617	0.0520077	0.0524954
ACGGGAAA	129	127	98	71	425			ACGGGAAA	0.0491968	0.0495579	0.0563896	0.0586118	0.0522495
AAGAGAAA	134	136	108	46	424			AAGAGAAA	0.0511037	0.0530699	0.0621436	0.0379738	0.0521266
ACACTAAT	149	81	141	53	424			ACACTAAT	0.0568242	0.0316078	0.0811319	0.0437525	0.0521266
ACGGAAAA	135	152	83	54	424			ACGGAAAA	0.0514851	0.0593134	0.0477585	0.044578	0.0521266
ATAGAAAG	121	140	104	59	424			ATAGAAAG	0.0461459	0.0546307	0.059842	0.0487056	0.0521266
AAGCGAAT	141	136	94	52	423			AAGCGAAT	0.0537733	0.0530699	0.054088	0.042927	0.0520036
AAAGCAAT	131	167	79	45	422			AAAGCAAT	0.0499596	0.0651667	0.0454569	0.0371483	0.0518807
AGCAGAAT	114	131	108	68	421			AGCAGAAT	0.0434763	0.0511188	0.0621436	0.0561353	0.0517577
AGGATAAG	130	134	97	58	419			AGGATAAG	0.0495782	0.0522894	0.0558142	0.0478801	0.0515119
AGTTAAAC	121	128	103	67	419			AGTTAAAC	0.0461459	0.0499481	0.0592666	0.0553097	0.0515119
AAACGAAG	118	151	84	64	417			AAACGAAG	0.0450018	0.0589232	0.0483339	0.0528332	0.051266
AATGAAAC	121	111	125	59	416			AATGAAAC	0.0461459	0.0433144	0.0719255	0.0487056	0.051143
ATACGAAG	126	147	96	47	416			ATACGAAG	0.0480527	0.0573623	0.0552388	0.0387994	0.051143
AACACAAA	119	166	77	53	415			AACACAAA	0.0453831	0.0647764	0.0443061	0.0437525	0.0510201
AGTGAAAG	123	160	71	61	415			AGTGAAAG	0.0469086	0.0624351	0.0408537	0.0503566	0.0510201
ACCTGAAT	153	92	114	53	412			ACCTGAAT	0.0583497	0.0359002	0.065596	0.0437525	0.0506513
AGAAAAAG	140	120	101	51	412			AGAAAAAG	0.0533919	0.0468263	0.0581158	0.0421014	0.0506513
AAAGTAAC	115	155	76	65	411			AAAGTAAC	0.0438576	0.060484	0.0437307	0.0536587	0.0505283
ACGTAAAG	109	171	71	58	409			ACGTAAAG	0.0415694	0.0667275	0.0408537	0.0478801	0.0502825
AGTTGAAA	125	136	85	62	408			AGTTGAAA	0.0476713	0.0530699	0.0489093	0.0511821	0.0501595
AAACTAAA	132	134	84	57	407			AAACTAAA	0.0503409	0.0522894	0.0483339	0.0470546	0.0500366
AAGTAAAC	125	137	85	59	406			AAGTAAAC	0.0476713	0.0534601	0.0489093	0.0487056	0.0499136
ATGTGAAG	127	118	109	52	406			ATGTGAAG	0.0484341	0.0460459	0.062719	0.042927	0.0499136
AGTAAAAC	112	170	68	55	405			AGTAAAAC	0.0427135	0.0663373	0.0391275	0.0454035	0.0497907
AGGGCAAT	116	117	97	74	404			AGGGCAAT	0.044239	0.0456557	0.0558142	0.0610884	0.0496678
AAGGGAAG	131	131	94	47	403			AAGGGAAG	0.0499596	0.0511188	0.054088	0.0387994	0.0495448
AGCCTAAT	132	83	141	46	402			AGCCTAAT	0.0503409	0.0323882	0.0811319	0.0379738	0.0494219
ATCAGAAA	117	140	92	53	402			ATCAGAAA	0.0446204	0.0546307	0.0529371	0.0437525	0.0494219
ATCGAAAA	134	113	98	55	400			ATCGAAAA	0.0511037	0.0440948	0.0563896	0.0454035	0.049176
ATTCCAAA	126	105	98	70	399			ATTCCAAA	0.0480527	0.0409731	0.0563896	0.0577863	0.0490531
AATCGAAG	107	136	95	60	398			AATCGAAG	0.0408067	0.0530699	0.0546634	0.0495311	0.0489301
ATCTTAAG	121	129	94	53	397			ATCTTAAG	0.0461459	0.0503383	0.054088	0.0437525	0.0488072
AGAATAAC	140	80	117	59	396			AGAATAAC	0.0533919	0.0312176	0.0673222	0.0487056	0.0486842
ATAGCAAT	135	114	86	59	394			ATAGCAAT	0.0514851	0.044485	0.0494847	0.0487056	0.0484384
ACACAAAA	119	165	65	44	393			ACACAAAA	0.0453831	0.0643862	0.0374012	0.0363228	0.0483154
AAGAAAAC	124	165	60	43	392			AAGAAAAC	0.04729	0.0643862	0.0345242	0.0354973	0.0481925
ACCAAAAT	117	141	69	65	392			ACCAAAAT	0.0446204	0.055021	0.0397029	0.0536587	0.0481925
AAGATAAG	118	118	103	52	391			AAGATAAG	0.0450018	0.0460459	0.0592666	0.042927	0.0480695
AATTGAAC	129	99	100	63	391			AATTGAAC	0.0491968	0.0386317	0.0575404	0.0520077	0.0480695
AACTTAAA	138	118	87	46	389			AACTTAAA	0.0526292	0.0460459	0.0500601	0.0379738	0.0478237
ACCATAAA	164	78	115	32	389			ACCATAAA	0.0625448	0.0304371	0.0661714	0.0264166	0.0478237
AGACGAAT	121	107	101	58	387			AGACGAAT	0.0461459	0.0417535	0.0581158	0.0478801	0.0475778
ATCAAAAG	118	149	72	47	386			ATCAAAAG	0.0450018	0.0581427	0.0414291	0.0387994	0.0474548
AGATAAAC	105	133	88	59	385			AGATAAAC	0.0400439	0.0518992	0.0506355	0.0487056	0.0473319
ACGGTAAA	102	130	91	61	384			ACGGTAAA	0.0388998	0.0507285	0.0523617	0.0503566	0.047209
ATCTCAAA	114	147	77	46	384			ATCTCAAA	0.0434763	0.0573623	0.0443061	0.0379738	0.047209
ACAAGAAT	119	112	90	62	383			ACAAGAAT	0.0453831	0.0437046	0.0517863	0.0511821	0.047086
AGCAAAAG	116	159	56	52	383			AGCAAAAG	0.044239	0.0620449	0.0322226	0.042927	0.047086
AGGAGAAG	118	130	82	53	383			AGGAGAAG	0.0450018	0.0507285	0.0471831	0.0437525	0.047086
ATGGGAAC	130	125	77	51	383			ATGGGAAC	0.0495782	0.0487774	0.0443061	0.0421014	0.047086
ACTCGAAT	127	103	90	61	381			ACTCGAAT	0.0484341	0.0401926	0.0517863	0.0503566	0.0468401
ACGAGAAT	129	89	95	67	380			ACGAGAAT	0.0491968	0.0347295	0.0546634	0.0553097	0.0467172
ATCCAAAG	112	145	69	54	380			ATCCAAAG	0.0427135	0.0565818	0.0397029	0.044578	0.0467172
ATCAAAAC	122	138	77	42	379			ATCAAAAC	0.0465272	0.0538503	0.0443061	0.0346718	0.0465943
ATCATAAG	130	97	101	51	379			ATCATAAG	0.0495782	0.0378513	0.0581158	0.0421014	0.0465943
ATGCCAAA	120	119	87	53	379			ATGCCAAA	0.0457645	0.0464361	0.0500601	0.0437525	0.0465943
AAGGTAAG	109	120	83	66	378			AAGGTAAG	0.0415694	0.0468263	0.0477585	0.0544842	0.0464713
ACAATAAA	126	116	86	48	376			ACAATAAA	0.0480527	0.0452655	0.0494847	0.0396249	0.0462254
AATGGAAC	115	115	81	64	375			AATGGAAC	0.0438576	0.0448752	0.0466077	0.0528332	0.0461025
ACAGTAAA	126	136	72	41	375			ACAGTAAA	0.0480527	0.0530699	0.0414291	0.0338463	0.0461025
ACGAAAAA	113	148	71	43	375			ACGAAAAA	0.0430949	0.0577525	0.0408537	0.0354973	0.0461025
ATAACAAG	120	91	108	56	375			ATAACAAG	0.0457645	0.03551	0.0621436	0.046229	0.0461025
ATACTAAG	118	113	90	53	374			ATACTAAG	0.0450018	0.0440948	0.0517863	0.0437525	0.0459796
ATACCAAT	122	101	90	57	370			ATACCAAT	0.0465272	0.0394122	0.0517863	0.0470546	0.0454878
AAAACAAC	95	156	60	56	367			AAAACAAC	0.0362302	0.0608742	0.0345242	0.046229	0.045119
ATCACAAT	118	100	90	59	367			ATCACAAT	0.0450018	0.039022	0.0517863	0.0487056	0.045119
AGTATAAG	104	105	102	55	366			AGTATAAG	0.0396626	0.0409731	0.0586912	0.0454035	0.044996
ATCTGAAA	98	121	80	66	365			ATCTGAAA	0.0373743	0.0472166	0.0460323	0.0544842	0.0448731
ATCTAAAG	108	129	69	58	364			ATCTAAAG	0.041188	0.0503383	0.0397029	0.0478801	0.0447502
ACTCTAAT	128	81	105	49	363			ACTCTAAT	0.0488155	0.0316078	0.0604174	0.0404504	0.0446272
AGTTCAAT	117	118	75	51	361			AGTTCAAT	0.0446204	0.0460459	0.0431553	0.0421014	0.0443813
ATGGTAAC	119	81	108	52	360			ATGGTAAC	0.0453831	0.0316078	0.0621436	0.042927	0.0442584
AGGACAAA	118	116	80	45	359			AGGACAAA	0.0450018	0.0452655	0.0460323	0.0371483	0.0441355
ATGTCAAG	99	104	93	63	359			ATGTCAAG	0.0377557	0.0405828	0.0535126	0.0520077	0.0441355
AAAGGAAC	114	122	77	45	358			AAAGGAAC	0.0434763	0.0476068	0.0443061	0.0371483	0.0440125
AGATCAAT	122	91	75	70	358			AGATCAAT	0.0465272	0.03551	0.0431553	0.0577863	0.0440125
ACCGTAAT	119	85	92	60	356			ACCGTAAT	0.0453831	0.0331687	0.0529371	0.0495311	0.0437666
AACATAAC	138	89	88	40	355			AACATAAC	0.0526292	0.0347295	0.0506355	0.0330207	0.0436437
AAGACAAT	125	98	83	49	355			AAGACAAT	0.0476713	0.0382415	0.0477585	0.0404504	0.0436437
ATATCAAC	126	94	78	57	355			ATATCAAC	0.0480527	0.0366806	0.0448815	0.0470546	0.0436437
AATGCAAC	114	118	71	50	353			AATGCAAC	0.0434763	0.0460459	0.0408537	0.0412759	0.0433978
ACTAAAAA	115	120	71	47	353			ACTAAAAA	0.0438576	0.0468263	0.0408537	0.0387994	0.0433978
ACCGAAAT	106	112	74	58	350			ACCGAAAT	0.0404253	0.0437046	0.0425799	0.0478801	0.043029
ACCGGAAT	108	102	85	55	350			ACCGGAAT	0.041188	0.0398024	0.0489093	0.0454035	0.043029
AGAAAAAC	105	133	64	48	350			AGAAAAAC	0.0400439	0.0518992	0.0368258	0.0396249	0.043029
ATCGGAAA	105	110	71	64	350			ATCGGAAA	0.0400439	0.0429241	0.0408537	0.0528332	0.043029
ATACCAAA	104	105	94	46	349			ATACCAAA	0.0396626	0.0409731	0.054088	0.0379738	0.0429061
AAGGAAAC	101	131	70	46	348			AAGGAAAC	0.0385185	0.0511188	0.0402783	0.0379738	0.0427831
AATAGAAC	100	98	94	56	348			AATAGAAC	0.0381371	0.0382415	0.054088	0.046229	0.0427831
ACATCAAT	114	94	99	41	348			ACATCAAT	0.0434763	0.0366806	0.056965	0.0338463	0.0427831
AGGACAAT	110	127	60	51	348			AGGACAAT	0.0419508	0.0495579	0.0345242	0.0421014	0.0427831
ACTGCAAA	109	137	69	32	347			ACTGCAAA	0.0415694	0.0534601	0.0397029	0.0264166	0.0426602
AGTCTAAA	97	102	87	61	347			AGTCTAAA	0.036993	0.0398024	0.0500601	0.0503566	0.0426602
AGAGAAAG	116	96	87	46	345			AGAGAAAG	0.044239	0.0374611	0.0500601	0.0379738	0.0424143
ACAGAAAA	102	121	82	39	344			ACAGAAAA	0.0388998	0.0472166	0.0471831	0.0321952	0.0422914
AGACAAAG	106	143	65	30	344			AGACAAAG	0.0404253	0.0558014	0.0374012	0.0247656	0.0422914
ATTAGAAC	112	91	98	43	344			ATTAGAAC	0.0427135	0.03551	0.0563896	0.0354973	0.0422914
ATCACAAA	87	138	65	53	343			ATCACAAA	0.0331793	0.0538503	0.0374012	0.0437525	0.0421684
ATTCCAAG	118	82	89	54	343			ATTCCAAG	0.0450018	0.031998	0.0512109	0.044578	0.0421684
ACGTTAAA	108	95	88	51	342			ACGTTAAA	0.041188	0.0370709	0.0506355	0.0421014	0.0420455
ACACGAAT	91	97	100	53	341			ACACGAAT	0.0347047	0.0378513	0.0575404	0.0437525	0.0419225
ACTATAAA	115	105	70	51	341			ACTATAAA	0.0438576	0.0409731	0.0402783	0.0421014	0.0419225
ATTCTAAC	132	84	86	39	341			ATTCTAAC	0.0503409	0.0327784	0.0494847	0.0321952	0.0419225
ACCTAAAT	103	99	85	51	338			ACCTAAAT	0.0392812	0.0386317	0.0489093	0.0421014	0.0415537
AGTACAAT	109	99	74	56	338			AGTACAAT	0.0415694	0.0386317	0.0425799	0.046229	0.0415537
ATTTCAAC	109	105	72	52	338			ATTTCAAC	0.0415694	0.0409731	0.0414291	0.042927	0.0415537
AAAGCAAG	105	117	64	51	337			AAAGCAAG	0.0400439	0.0456557	0.0368258	0.0421014	0.0414308
AGATCAAA	103	106	84	43	336			AGATCAAA	0.0392812	0.0413633	0.0483339	0.0354973	0.0413078
AGTCCAAT	101	108	81	45	335			AGTCCAAT	0.0385185	0.0421437	0.0466077	0.0371483	0.0411849
ATCTTAAC	92	103	78	62	335			ATCTTAAC	0.0350861	0.0401926	0.0448815	0.0511821	0.0411849
ACTCAAAA	112	118	59	44	333			ACTCAAAA	0.0427135	0.0460459	0.0339488	0.0363228	0.040939
AACTAAAA	113	99	83	37	332			AACTAAAA	0.0430949	0.0386317	0.0477585	0.0305442	0.0408161
AGAGGAAG	94	113	75	50	332			AGAGGAAG	0.0358489	0.0440948	0.0431553	0.0412759	0.0408161
AGGGGAAC	109	91	72	59	331			AGGGGAAC	0.0415694	0.03551	0.0414291	0.0487056	0.0406931
AAAAGAAC	92	120	77	41	330			AAAAGAAC	0.0350861	0.0468263	0.0443061	0.0338463	0.0405702
AATACAAC	108	86	70	66	330			AATACAAC	0.041188	0.0335589	0.0402783	0.0544842	0.0405702
ACGGAAAG	104	104	77	45	330			ACGGAAAG	0.0396626	0.0405828	0.0443061	0.0371483	0.0405702
ACTGTAAA	106	104	73	47	330			ACTGTAAA	0.0404253	0.0405828	0.0420045	0.0387994	0.0405702
ATAGGAAC	89	96	78	66	329			ATAGGAAC	0.033942	0.0374611	0.0448815	0.0544842	0.0404473
ATATGAAC	102	77	86	64	329			ATATGAAC	0.0388998	0.0300469	0.0494847	0.0528332	0.0404473
AGCGTAAA	112	89	79	48	328			AGCGTAAA	0.0427135	0.0347295	0.0454569	0.0396249	0.0403243
AAGCTAAA	91	116	78	42	327			AAGCTAAA	0.0347047	0.0452655	0.0448815	0.0346718	0.0402014
AGATAAAG	115	92	86	34	327			AGATAAAG	0.0438576	0.0359002	0.0494847	0.0280676	0.0402014
ATGAGAAC	106	77	96	47	326			ATGAGAAC	0.0404253	0.0300469	0.0552388	0.0387994	0.0400784
AAGTGAAG	100	99	71	55	325			AAGTGAAG	0.0381371	0.0386317	0.0408537	0.0454035	0.0399555
AGCCAAAA	93	128	66	37	324			AGCCAAAA	0.0354675	0.0499481	0.0379767	0.0305442	0.0398326
ATTGGAAG	81	95	95	53	324			ATTGGAAG	0.030891	0.0370709	0.0546634	0.0437525	0.0398326
AGAAGAAG	76	97	95	55	323			AGAAGAAG	0.0289842	0.0378513	0.0546634	0.0454035	0.0397096
ATAAGAAC	95	85	90	53	323			ATAAGAAC	0.0362302	0.0331687	0.0517863	0.0437525	0.0397096
ACGCGAAT	102	86	89	45	322			ACGCGAAT	0.0388998	0.0335589	0.0512109	0.0371483	0.0395867
ATTGAAAC	113	104	56	48	321			ATTGAAAC	0.0430949	0.0405828	0.0322226	0.0396249	0.0394637
AACCAAAG	88	138	66	28	320			AACCAAAG	0.0335606	0.0538503	0.0379767	0.0231145	0.0393408
AAGGGAAC	102	93	88	37	320			AAGGGAAC	0.0388998	0.0362904	0.0506355	0.0305442	0.0393408
AGGCTAAA	100	93	72	55	320			AGGCTAAA	0.0381371	0.0362904	0.0414291	0.0454035	0.0393408
AGTTTAAC	105	96	78	40	319			AGTTTAAC	0.0400439	0.0374611	0.0448815	0.0330207	0.0392179
ACGTTAAG	97	100	72	49	318			ACGTTAAG	0.036993	0.039022	0.0414291	0.0404504	0.0390949
ATGATAAC	89	85	85	58	317			ATGATAAC	0.033942	0.0331687	0.0489093	0.0478801	0.038972
ACGAAAAG	84	118	64	50	316			ACGAAAAG	0.0320351	0.0460459	0.0368258	0.0412759	0.038849
AGCGAAAA	102	107	67	40	316			AGCGAAAA	0.0388998	0.0417535	0.0385521	0.0330207	0.038849
AGGTGAAG	105	87	67	57	316			AGGTGAAG	0.0400439	0.0339491	0.0385521	0.0470546	0.038849
AGTGTAAG	84	104	77	51	316			AGTGTAAG	0.0320351	0.0405828	0.0443061	0.0421014	0.038849
AAGAGAAG	89	103	70	53	315			AAGAGAAG	0.033942	0.0401926	0.0402783	0.0437525	0.0387261
ACGATAAA	97	83	75	59	314			ACGATAAA	0.036993	0.0323882	0.0431553	0.0487056	0.0386032
AACCGAAT	108	83	63	59	313			AACCGAAT	0.041188	0.0323882	0.0362504	0.0487056	0.0384802
ACGAGAAA	100	91	76	46	313			ACGAGAAA	0.0381371	0.03551	0.0437307	0.0379738	0.0384802
AACAGAAA	110	91	71	40	312			AACAGAAA	0.0419508	0.03551	0.0408537	0.0330207	0.0383573
ACTTGAAA	83	111	73	45	312			ACTTGAAA	0.0316538	0.0433144	0.0420045	0.0371483	0.0383573
AGTGCAAT	91	94	79	48	312			AGTGCAAT	0.0347047	0.0366806	0.0454569	0.0396249	0.0383573
ATCGTAAG	90	97	78	47	312			ATCGTAAG	0.0343234	0.0378513	0.0448815	0.0387994	0.0383573
AACTCAAA	104	114	64	28	310			AACTCAAA	0.0396626	0.044485	0.0368258	0.0231145	0.0381114
ACAAGAAA	96	99	76	39	310			ACAAGAAA	0.0366116	0.0386317	0.0437307	0.0321952	0.0381114
AGAGCAAA	98	111	51	50	310			AGAGCAAA	0.0373743	0.0433144	0.0293456	0.0412759	0.0381114
AAAGAAAC	93	111	59	45	308			AAAGAAAC	0.0354675	0.0433144	0.0339488	0.0371483	0.0378655
ATGCGAAC	105	99	62	42	308			ATGCGAAC	0.0400439	0.0386317	0.035675	0.0346718	0.0378655
AAGCGAAA	94	110	68	35	307			AAGCGAAA	0.0358489	0.0429241	0.0391275	0.0288931	0.0377426
AGGCGAAA	102	99	62	44	307			AGGCGAAA	0.0388998	0.0386317	0.035675	0.0363228	0.0377426
AGTCGAAA	113	83	72	39	307			AGTCGAAA	0.0430949	0.0323882	0.0414291	0.0321952	0.0377426
ACAATAAG	89	96	73	48	306			ACAATAAG	0.033942	0.0374611	0.0420045	0.0396249	0.0376196
ACGTAAAC	94	111	52	49	306			ACGTAAAC	0.0358489	0.0433144	0.029921	0.0404504	0.0376196
ATGTGAAC	98	94	67	47	306			ATGTGAAC	0.0373743	0.0366806	0.0385521	0.0387994	0.0376196
AACTGAAA	94	98	67	46	305			AACTGAAA	0.0358489	0.0382415	0.0385521	0.0379738	0.0374967
AATCGAAC	96	89	58	62	305			AATCGAAC	0.0366116	0.0347295	0.0333734	0.0511821	0.0374967
AGTTCAAA	93	99	62	51	305			AGTTCAAA	0.0354675	0.0386317	0.035675	0.0421014	0.0374967
AGCGGAAA	99	83	82	40	304			AGCGGAAA	0.0377557	0.0323882	0.0471831	0.0330207	0.0373738
ATAGCAAG	84	101	63	55	303			ATAGCAAG	0.0320351	0.0394122	0.0362504	0.0454035	0.0372508
ATTCGAAC	92	83	80	48	303			ATTCGAAC	0.0350861	0.0323882	0.0460323	0.0396249	0.0372508
AACTTAAG	92	93	73	44	302			AACTTAAG	0.0350861	0.0362904	0.0420045	0.0363228	0.0371279
AAGCCAAA	80	119	72	31	302			AAGCCAAA	0.0305097	0.0464361	0.0414291	0.0255911	0.0371279
ACTTAAAG	86	84	76	56	302			ACTTAAAG	0.0327979	0.0327784	0.0437307	0.046229	0.0371279
AGTGGAAG	85	106	62	49	302			AGTGGAAG	0.0324165	0.0413633	0.035675	0.0404504	0.0371279
AGGCTAAG	95	80	72	54	301			AGGCTAAG	0.0362302	0.0312176	0.0414291	0.044578	0.0370049
ACGTGAAA	98	99	67	36	300			ACGTGAAA	0.0373743	0.0386317	0.0385521	0.0297187	0.036882
ACTGGAAA	95	96	57	52	300			ACTGGAAA	0.0362302	0.0374611	0.032798	0.042927	0.036882
ATGGCAAG	93	90	72	45	300			ATGGCAAG	0.0354675	0.0351198	0.0414291	0.0371483	0.036882
AGAGCAAT	93	85	77	44	299			AGAGCAAT	0.0354675	0.0331687	0.0443061	0.0363228	0.0367591
AATCCAAG	85	109	59	45	298			AATCCAAG	0.0324165	0.0425339	0.0339488	0.0371483	0.0366361
ACGGCAAA	86	114	53	45	298			ACGGCAAA	0.0327979	0.044485	0.0304964	0.0371483	0.0366361
ACATGAAG	99	77	78	43	297			ACATGAAG	0.0377557	0.0300469	0.0448815	0.0354973	0.0365132
AGAACAAA	84	82	91	40	297			AGAACAAA	0.0320351	0.031998	0.0523617	0.0330207	0.0365132
AGAGTAAG	80	100	81	36	297			AGAGTAAG	0.0305097	0.039022	0.0466077	0.0297187	0.0365132
AGGCCAAT	89	81	77	50	297			AGGCCAAT	0.033942	0.0316078	0.0443061	0.0412759	0.0365132
AGTAGAAG	106	86	68	36	296			AGTAGAAG	0.0404253	0.0335589	0.0391275	0.0297187	0.0363902
ATCTCAAG	82	100	64	50	296			ATCTCAAG	0.0312724	0.039022	0.0368258	0.0412759	0.0363902
AGTACAAA	88	96	57	54	295			AGTACAAA	0.0335606	0.0374611	0.032798	0.044578	0.0362673
ATAGAAAC	86	87	79	43	295			ATAGAAAC	0.0327979	0.0339491	0.0454569	0.0354973	0.0362673
AAACGAAC	86	112	51	43	292			AAACGAAC	0.0327979	0.0437046	0.0293456	0.0354973	0.0358985
AGAACAAT	99	75	72	46	292			AGAACAAT	0.0377557	0.0292665	0.0414291	0.0379738	0.0358985
AAGTCAAG	87	94	70	40	291			AAGTCAAG	0.0331793	0.0366806	0.0402783	0.0330207	0.0357755
AAGTTAAC	91	91	66	43	291			AAGTTAAC	0.0347047	0.03551	0.0379767	0.0354973	0.0357755
AGTTGAAG	93	102	55	41	291			AGTTGAAG	0.0354675	0.0398024	0.0316472	0.0338463	0.0357755
ATCTGAAG	78	92	71	50	291			ATCTGAAG	0.0297469	0.0359002	0.0408537	0.0412759	0.0357755
ATTGTAAC	95	86	65	45	291			ATTGTAAC	0.0362302	0.0335589	0.0374012	0.0371483	0.0357755
AGCTAAAA	74	109	66	41	290			AGCTAAAA	0.0282214	0.0425339	0.0379767	0.0338463	0.0356526
AGCTTAAA	97	66	76	51	290			AGCTTAAA	0.036993	0.0257545	0.0437307	0.0421014	0.0356526
ACAGGAAG	90	85	66	48	289			ACAGGAAG	0.0343234	0.0331687	0.0379767	0.0396249	0.0355297
AAACCAAT	88	112	46	42	288			AAACCAAT	0.0335606	0.0437046	0.0264686	0.0346718	0.0354067
ACATCAAA	98	93	68	29	288			ACATCAAA	0.0373743	0.0362904	0.0391275	0.02394	0.0354067
ACGGTAAG	92	92	54	50	288			ACGGTAAG	0.0350861	0.0359002	0.0310718	0.0412759	0.0354067
ATGACAAG	106	86	61	35	288			ATGACAAG	0.0404253	0.0335589	0.0350996	0.0288931	0.0354067
AACTCAAT	99	74	76	38	287			AACTCAAT	0.0377557	0.0288762	0.0437307	0.0313697	0.0352838
AGACTAAA	98	76	77	35	286			AGACTAAA	0.0373743	0.0296567	0.0443061	0.0288931	0.0351608
ACCAAAAA	88	109	57	31	285			ACCAAAAA	0.0335606	0.0425339	0.032798	0.0255911	0.0350379
ACCCTAAT	97	70	90	27	284			ACCCTAAT	0.036993	0.0273154	0.0517863	0.022289	0.034915
AGCTTAAG	76	97	68	43	284			AGCTTAAG	0.0289842	0.0378513	0.0391275	0.0354973	0.034915
AGACGAAA	81	88	82	32	283			AGACGAAA	0.030891	0.0343393	0.0471831	0.0264166	0.034792
ACTTAAAC	88	71	80	43	282			ACTTAAAC	0.0335606	0.0277056	0.0460323	0.0354973	0.0346691
ATCGCAAT	88	84	68	42	282			ATCGCAAT	0.0335606	0.0327784	0.0391275	0.0346718	0.0346691
ATCTAAAC	60	97	65	60	282			ATCTAAAC	0.0228822	0.0378513	0.0374012	0.0495311	0.0346691
ATTGGAAC	82	78	74	47	281			ATTGGAAC	0.0312724	0.0304371	0.0425799	0.0387994	0.0345461
ACTTCAAT	67	93	66	54	280			ACTTCAAT	0.0255518	0.0362904	0.0379767	0.044578	0.0344232
AACACAAT	92	75	61	51	279			AACACAAT	0.0350861	0.0292665	0.0350996	0.0421014	0.0343003
ACCAGAAT	84	75	76	44	279			ACCAGAAT	0.0320351	0.0292665	0.0437307	0.0363228	0.0343003
AGCAGAAA	98	86	59	34	277			AGCAGAAA	0.0373743	0.0335589	0.0339488	0.0280676	0.0340544
ATACGAAC	90	82	60	42	274			ATACGAAC	0.0343234	0.031998	0.0345242	0.0346718	0.0336856
ACTGAAAA	82	84	63	44	273			ACTGAAAA	0.0312724	0.0327784	0.0362504	0.0363228	0.0335626
AGACAAAC	82	106	46	39	273			AGACAAAC	0.0312724	0.0413633	0.0264686	0.0321952	0.0335626
AGGGTAAC	89	88	57	39	273			AGGGTAAC	0.033942	0.0343393	0.032798	0.0321952	0.0335626
ACGGCAAT	87	86	64	35	272			ACGGCAAT	0.0331793	0.0335589	0.0368258	0.0288931	0.0334397
ACGTCAAT	89	69	74	39	271			ACGTCAAT	0.033942	0.0269251	0.0425799	0.0321952	0.0333167
ATTGCAAG	71	86	69	44	270			ATTGCAAG	0.0270773	0.0335589	0.0397029	0.0363228	0.0331938
ATACTAAC	91	78	51	48	268			ATACTAAC	0.0347047	0.0304371	0.0293456	0.0396249	0.0329479
AAGGCAAG	86	84	66	31	267			AAGGCAAG	0.0327979	0.0327784	0.0379767	0.0255911	0.032825
AGATGAAG	86	81	64	36	267			AGATGAAG	0.0327979	0.0316078	0.0368258	0.0297187	0.032825
ATCAGAAG	71	92	63	40	266			ATCAGAAG	0.0270773	0.0359002	0.0362504	0.0330207	0.032702
ATCCTAAG	85	80	52	49	266			ATCCTAAG	0.0324165	0.0312176	0.029921	0.0404504	0.032702
ACTTTAAC	84	78	60	43	265			ACTTTAAC	0.0320351	0.0304371	0.0345242	0.0354973	0.0325791
ATCCGAAA	80	79	65	41	265			ATCCGAAA	0.0305097	0.0308273	0.0374012	0.0338463	0.0325791
ACTTTAAG	88	85	52	39	264			ACTTTAAG	0.0335606	0.0331687	0.029921	0.0321952	0.0324562
AACGTAAG	79	86	61	37	263			AACGTAAG	0.0301283	0.0335589	0.0350996	0.0305442	0.0323332
AGGATAAC	69	75	76	43	263			AGGATAAC	0.0263146	0.0292665	0.0437307	0.0354973	0.0323332
AGGGCAAG	77	85	56	44	262			AGGGCAAG	0.0293656	0.0331687	0.0322226	0.0363228	0.0322103
ATTCCAAC	89	69	75	27	260			ATTCCAAC	0.033942	0.0269251	0.0431553	0.022289	0.0319644
AATCTAAC	86	81	59	33	259			AATCTAAC	0.0327979	0.0316078	0.0339488	0.0272421	0.0318415
ACACAAAG	81	107	34	37	259			ACACAAAG	0.030891	0.0417535	0.0195637	0.0305442	0.0318415
ACACGAAA	87	99	47	26	259			ACACGAAA	0.0331793	0.0386317	0.027044	0.0214635	0.0318415
ACGCTAAA	80	72	68	39	259			ACGCTAAA	0.0305097	0.0280958	0.0391275	0.0321952	0.0318415
ACTAAAAG	74	85	64	36	259			ACTAAAAG	0.0282214	0.0331687	0.0368258	0.0297187	0.0318415
AGGTTAAC	84	83	51	41	259			AGGTTAAC	0.0320351	0.0323882	0.0293456	0.0338463	0.0318415
AGCCGAAT	82	72	64	40	258			AGCCGAAT	0.0312724	0.0280958	0.0368258	0.0330207	0.0317185
AGGTCAAG	78	71	73	35	257			AGGTCAAG	0.0297469	0.0277056	0.0420045	0.0288931	0.0315956
ATCGAAAG	77	97	50	33	257			ATCGAAAG	0.0293656	0.0378513	0.0287702	0.0272421	0.0315956
AGTTCAAG	78	92	48	38	256			AGTTCAAG	0.0297469	0.0359002	0.0276194	0.0313697	0.0314726
AACGAAAG	82	84	57	32	255			AACGAAAG	0.0312724	0.0327784	0.032798	0.0264166	0.0313497
ACAAGAAG	91	70	55	39	255			ACAAGAAG	0.0347047	0.0273154	0.0316472	0.0321952	0.0313497
ATCACAAG	59	84	58	54	255			ATCACAAG	0.0225009	0.0327784	0.0333734	0.044578	0.0313497
ACGGGAAG	87	65	59	42	253			ACGGGAAG	0.0331793	0.0253643	0.0339488	0.0346718	0.0311038
ATCCCAAT	83	64	66	40	253			ATCCCAAT	0.0316538	0.0249741	0.0379767	0.0330207	0.0311038
AACGCAAT	91	62	61	38	252			AACGCAAT	0.0347047	0.0241936	0.0350996	0.0313697	0.0309809
AGATCAAG	80	70	69	33	252			AGATCAAG	0.0305097	0.0273154	0.0397029	0.0272421	0.0309809
ATAGTAAC	74	59	72	46	251			ATAGTAAC	0.0282214	0.023023	0.0414291	0.0379738	0.0308579
ATCCTAAA	70	73	57	51	251			ATCCTAAA	0.026696	0.028486	0.032798	0.0421014	0.0308579
ACAACAAA	79	95	46	30	250			ACAACAAA	0.0301283	0.0370709	0.0264686	0.0247656	0.030735
ACTATAAG	76	77	59	38	250			ACTATAAG	0.0289842	0.0300469	0.0339488	0.0313697	0.030735
ACCATAAG	85	61	72	30	248			ACCATAAG	0.0324165	0.0238034	0.0414291	0.0247656	0.0304891
AGTACAAG	76	92	44	36	248			AGTACAAG	0.0289842	0.0359002	0.0253178	0.0297187	0.0304891
ATCATAAC	85	59	65	39	248			ATCATAAC	0.0324165	0.023023	0.0374012	0.0321952	0.0304891
ATTACAAC	82	66	73	27	248			ATTACAAC	0.0312724	0.0257545	0.0420045	0.022289	0.0304891
AACCAAAC	65	112	41	29	247			AACCAAAC	0.0247891	0.0437046	0.0235916	0.02394	0.0303662
AAGAGAAC	71	73	68	35	247			AAGAGAAC	0.0270773	0.028486	0.0391275	0.0288931	0.0303662
ACTCGAAA	71	75	62	38	246			ACTCGAAA	0.0270773	0.0292665	0.035675	0.0313697	0.0302432
AGCTCAAT	97	67	55	27	246			AGCTCAAT	0.036993	0.0261447	0.0316472	0.022289	0.0302432
ACAGTAAG	86	82	44	33	245			ACAGTAAG	0.0327979	0.031998	0.0253178	0.0272421	0.0301203
AGACTAAG	73	77	57	38	245			AGACTAAG	0.0278401	0.0300469	0.032798	0.0313697	0.0301203
ACTACAAT	81	73	49	41	244			ACTACAAT	0.030891	0.028486	0.0281948	0.0338463	0.0299974
ACTAGAAA	84	67	56	37	244			ACTAGAAA	0.0320351	0.0261447	0.0322226	0.0305442	0.0299974
ACTCAAAG	88	94	42	20	244			ACTCAAAG	0.0335606	0.0366806	0.024167	0.0165104	0.0299974
AAGATAAC	65	73	58	47	243			AAGATAAC	0.0247891	0.028486	0.0333734	0.0387994	0.0298744
AGTCGAAG	80	59	62	42	243			AGTCGAAG	0.0305097	0.023023	0.035675	0.0346718	0.0298744
ATCCGAAG	72	78	52	41	243			ATCCGAAG	0.0274587	0.0304371	0.029921	0.0338463	0.0298744
AGTCTAAG	62	88	56	36	242			AGTCTAAG	0.023645	0.0343393	0.0322226	0.0297187	0.0297515
AGGCCAAG	71	80	58	32	241			AGGCCAAG	0.0270773	0.0312176	0.0333734	0.0264166	0.0296285
ACTGCAAT	79	94	37	30	240			ACTGCAAT	0.0301283	0.0366806	0.0212899	0.0247656	0.0295056
ACTTCAAA	67	86	56	31	240			ACTTCAAA	0.0255518	0.0335589	0.0322226	0.0255911	0.0295056
AGCGCAAT	73	66	64	36	239			AGCGCAAT	0.0278401	0.0257545	0.0368258	0.0297187	0.0293827
AGTCCAAA	67	85	52	34	238			AGTCCAAA	0.0255518	0.0331687	0.029921	0.0280676	0.0292597
ATCCCAAA	69	88	44	36	237			ATCCCAAA	0.0263146	0.0343393	0.0253178	0.0297187	0.0291368
ACAGCAAA	65	92	37	42	236			ACAGCAAA	0.0247891	0.0359002	0.0212899	0.0346718	0.0290138
ATCTGAAC	72	66	46	52	236			ATCTGAAC	0.0274587	0.0257545	0.0264686	0.042927	0.0290138
ATGCCAAG	80	64	62	30	236			ATGCCAAG	0.0305097	0.0249741	0.035675	0.0247656	0.0290138
AACTAAAG	63	75	54	43	235			AACTAAAG	0.0240264	0.0292665	0.0310718	0.0354973	0.0288909
AAACTAAC	67	77	55	35	234			AAACTAAC	0.0255518	0.0300469	0.0316472	0.0288931	0.028768
ACACAAAC	62	102	33	36	233			ACACAAAC	0.023645	0.0398024	0.0189883	0.0297187	0.028645
ATAACAAC	66	57	68	42	233			ATAACAAC	0.0251705	0.0222425	0.0391275	0.0346718	0.028645
AAGGTAAC	82	60	51	39	232			AAGGTAAC	0.0312724	0.0234132	0.0293456	0.0321952	0.0285221
ACATCAAG	63	68	61	40	232			ACATCAAG	0.0240264	0.0265349	0.0350996	0.0330207	0.0285221
AACTGAAG	67	55	68	41	231			AACTGAAG	0.0255518	0.0214621	0.0391275	0.0338463	0.0283991
AGCGCAAA	69	83	53	26	231			AGCGCAAA	0.0263146	0.0323882	0.0304964	0.0214635	0.0283991
AGGACAAG	69	76	51	35	231			AGGACAAG	0.0263146	0.0296567	0.0293456	0.0288931	0.0283991
AACAGAAG	64	70	59	36	229			AACAGAAG	0.0244077	0.0273154	0.0339488	0.0297187	0.0281533
AGCCAAAG	75	93	38	23	229			AGCCAAAG	0.0286028	0.0362904	0.0218653	0.0189869	0.0281533
ACGACAAT	76	64	52	36	228			ACGACAAT	0.0289842	0.0249741	0.029921	0.0297187	0.0280303
ACTACAAA	56	73	68	31	228			ACTACAAA	0.0213568	0.028486	0.0391275	0.0255911	0.0280303
AGCTAAAG	73	74	49	31	227			AGCTAAAG	0.0278401	0.0288762	0.0281948	0.0255911	0.0279074
AAGTGAAC	61	65	53	47	226			AAGTGAAC	0.0232636	0.0253643	0.0304964	0.0387994	0.0277844
ACTCTAAA	71	73	52	30	226			ACTCTAAA	0.0270773	0.028486	0.029921	0.0247656	0.0277844
ACAGCAAT	75	72	50	26	223			ACAGCAAT	0.0286028	0.0280958	0.0287702	0.0214635	0.0274156
ACATGAAC	64	78	58	23	223			ACATGAAC	0.0244077	0.0304371	0.0333734	0.0189869	0.0274156
AAGACAAG	68	67	53	34	222			AAGACAAG	0.0259332	0.0261447	0.0304964	0.0280676	0.0272927
AGATGAAC	75	53	63	31	222			AGATGAAC	0.0286028	0.0206816	0.0362504	0.0255911	0.0272927
ATACCAAG	66	61	58	37	222			ATACCAAG	0.0251705	0.0238034	0.0333734	0.0305442	0.0272927
AACCGAAA	71	68	51	31	221			AACCGAAA	0.0270773	0.0265349	0.0293456	0.0255911	0.0271697
AGCGAAAG	65	85	42	29	221			AGCGAAAG	0.0247891	0.0331687	0.024167	0.02394	0.0271697
AAGTCAAC	67	79	41	33	220			AAGTCAAC	0.0255518	0.0308273	0.0235916	0.0272421	0.0270468
ACAGAAAG	78	72	41	29	220			ACAGAAAG	0.0297469	0.0280958	0.0235916	0.02394	0.0270468
ACGTGAAG	68	66	49	37	220			ACGTGAAG	0.0259332	0.0257545	0.0281948	0.0305442	0.0270468
ACTAGAAG	60	77	55	28	220			ACTAGAAG	0.0228822	0.0300469	0.0316472	0.0231145	0.0270468
AGCACAAA	67	71	42	40	220			AGCACAAA	0.0255518	0.0277056	0.024167	0.0330207	0.0270468
AGGAGAAC	72	67	63	18	220			AGGAGAAC	0.0274587	0.0261447	0.0362504	0.0148593	0.0270468
ATCGAAAC	72	81	41	26	220			ATCGAAAC	0.0274587	0.0316078	0.0235916	0.0214635	0.0270468
ACGATAAG	72	55	54	38	219			ACGATAAG	0.0274587	0.0214621	0.0310718	0.0313697	0.0269239
AGGCCAAA	76	62	47	34	219			AGGCCAAA	0.0289842	0.0241936	0.027044	0.0280676	0.0269239
AGTTGAAC	68	66	44	41	219			AGTTGAAC	0.0259332	0.0257545	0.0253178	0.0338463	0.0269239
ACGAAAAC	67	74	45	32	218			ACGAAAAC	0.0255518	0.0288762	0.0258932	0.0264166	0.0268009
ACGAGAAG	57	69	50	42	218			ACGAGAAG	0.0217381	0.0269251	0.0287702	0.0346718	0.0268009
ACGTCAAA	71	95	31	21	218			ACGTCAAA	0.0270773	0.0370709	0.0178375	0.0173359	0.0268009
AGTATAAC	73	58	57	30	218			AGTATAAC	0.0278401	0.0226327	0.032798	0.0247656	0.0268009
ATGACAAC	68	71	36	43	218			ATGACAAC	0.0259332	0.0277056	0.0207145	0.0354973	0.0268009
AAAGCAAC	67	72	45	33	217			AAAGCAAC	0.0255518	0.0280958	0.0258932	0.0272421	0.026678
AACTAAAC	59	74	52	32	217			AACTAAAC	0.0225009	0.0288762	0.029921	0.0264166	0.026678
AACTTAAC	77	60	50	30	217			AACTTAAC	0.0293656	0.0234132	0.0287702	0.0247656	0.026678
AAGCCAAT	74	67	43	33	217			AAGCCAAT	0.0282214	0.0261447	0.0247424	0.0272421	0.026678
AGACCAAT	72	67	38	40	217			AGACCAAT	0.0274587	0.0261447	0.0218653	0.0330207	0.026678
AGCTGAAA	70	67	51	29	217			AGCTGAAA	0.026696	0.0261447	0.0293456	0.02394	0.026678
AACCTAAA	54	62	68	32	216			AACCTAAA	0.020594	0.0241936	0.0391275	0.0264166	0.026555
AGTGGAAC	70	72	36	38	216			AGTGGAAC	0.026696	0.0280958	0.0207145	0.0313697	0.026555
ACAGAAAC	73	69	45	28	215			ACAGAAAC	0.0278401	0.0269251	0.0258932	0.0231145	0.0264321
ATGGCAAC	69	76	38	32	215			ATGGCAAC	0.0263146	0.0296567	0.0218653	0.0264166	0.0264321
ACAACAAT	65	59	53	37	214			ACAACAAT	0.0247891	0.023023	0.0304964	0.0305442	0.0263092
ACCCGAAT	61	56	67	30	214			ACCCGAAT	0.0232636	0.0218523	0.0385521	0.0247656	0.0263092
ACCGGAAA	71	68	41	34	214			ACCGGAAA	0.0270773	0.0265349	0.0235916	0.0280676	0.0263092
AGAGAAAC	58	85	43	28	214			AGAGAAAC	0.0221195	0.0331687	0.0247424	0.0231145	0.0263092
AGGCGAAG	63	62	53	36	214			AGGCGAAG	0.0240264	0.0241936	0.0304964	0.0297187	0.0263092
ACGTTAAC	63	60	55	35	213			ACGTTAAC	0.0240264	0.0234132	0.0316472	0.0288931	0.0261862
AGCACAAT	61	66	54	32	213			AGCACAAT	0.0232636	0.0257545	0.0310718	0.0264166	0.0261862
AGTGAAAC	74	83	31	25	213			AGTGAAAC	0.0282214	0.0323882	0.0178375	0.020638	0.0261862
ACCTTAAA	55	96	40	21	212			ACCTTAAA	0.0209754	0.0374611	0.0230162	0.0173359	0.0260633
ATCCAAAC	61	88	31	32	212			ATCCAAAC	0.0232636	0.0343393	0.0178375	0.0264166	0.0260633
ATCGTAAC	62	61	50	39	212			ATCGTAAC	0.023645	0.0238034	0.0287702	0.0321952	0.0260633
AGAGGAAC	60	60	59	32	211			AGAGGAAC	0.0228822	0.0234132	0.0339488	0.0264166	0.0259403
ACTAAAAC	61	59	54	36	210			ACTAAAAC	0.0232636	0.023023	0.0310718	0.0297187	0.0258174
ATCTCAAC	66	65	47	32	210			ATCTCAAC	0.0251705	0.0253643	0.027044	0.0264166	0.0258174
ACACTAAA	67	70	51	21	209			ACACTAAA	0.0255518	0.0273154	0.0293456	0.0173359	0.0256945
AGCAGAAG	61	79	36	32	208			AGCAGAAG	0.0232636	0.0308273	0.0207145	0.0264166	0.0255715
AAGCGAAG	71	61	47	28	207			AAGCGAAG	0.0270773	0.0238034	0.027044	0.0231145	0.0254486
ACTGTAAG	59	68	47	32	206			ACTGTAAG	0.0225009	0.0265349	0.027044	0.0264166	0.0253256
AGGTCAAC	52	69	50	35	206			AGGTCAAC	0.0198313	0.0269251	0.0287702	0.0288931	0.0253256
ACTCCAAT	77	62	38	28	205			ACTCCAAT	0.0293656	0.0241936	0.0218653	0.0231145	0.0252027
AGTAGAAC	71	62	42	29	204			AGTAGAAC	0.0270773	0.0241936	0.024167	0.02394	0.0250798
ATCAGAAC	56	61	42	45	204			ATCAGAAC	0.0213568	0.0238034	0.024167	0.0371483	0.0250798
AGCGTAAG	56	55	51	41	203			AGCGTAAG	0.0213568	0.0214621	0.0293456	0.0338463	0.0249568
AAGCTAAG	65	48	56	33	202			AAGCTAAG	0.0247891	0.0187305	0.0322226	0.0272421	0.0248339
ACCAGAAA	76	65	42	19	202			ACCAGAAA	0.0289842	0.0253643	0.024167	0.0156849	0.0248339
AGAGTAAC	54	60	56	32	202			AGAGTAAC	0.020594	0.0234132	0.0322226	0.0264166	0.0248339
AGAACAAG	58	56	58	28	200			AGAACAAG	0.0221195	0.0218523	0.0333734	0.0231145	0.024588
AGCCTAAA	71	49	55	25	200			AGCCTAAA	0.0270773	0.0191208	0.0316472	0.020638	0.024588
ATACCAAC	64	62	48	26	200			ATACCAAC	0.0244077	0.0241936	0.0276194	0.0214635	0.024588
ACCGAAAA	65	58	56	20	199			ACCGAAAA	0.0247891	0.0226327	0.0322226	0.0165104	0.0244651
AGTCCAAG	62	67	44	26	199			AGTCCAAG	0.023645	0.0261447	0.0253178	0.0214635	0.0244651
ATCCTAAC	45	59	52	43	199			ATCCTAAC	0.0171617	0.023023	0.029921	0.0354973	0.0244651
ACGATAAC	66	49	51	32	198			ACGATAAC	0.0251705	0.0191208	0.0293456	0.0264166	0.0243421
ACGACAAA	57	57	52	31	197			ACGACAAA	0.0217381	0.0222425	0.029921	0.0255911	0.0242192
AGCTCAAA	66	62	37	32	197			AGCTCAAA	0.0251705	0.0241936	0.0212899	0.0264166	0.0242192
ACAGGAAC	64	57	46	29	196			ACAGGAAC	0.0244077	0.0222425	0.0264686	0.02394	0.0240962
ACGGAAAC	52	74	33	37	196			ACGGAAAC	0.0198313	0.0288762	0.0189883	0.0305442	0.0240962
AGTGCAAG	49	61	54	32	196			AGTGCAAG	0.0186872	0.0238034	0.0310718	0.0264166	0.0240962
ACTCCAAA	68	71	38	18	195			ACTCCAAA	0.0259332	0.0277056	0.0218653	0.0148593	0.0239733
ACAATAAC	65	54	45	30	194			ACAATAAC	0.0247891	0.0210719	0.0258932	0.0247656	0.0238504
ACTGGAAG	55	54	47	38	194			ACTGGAAG	0.0209754	0.0210719	0.027044	0.0313697	0.0238504
ACCAAAAC	44	82	42	25	193			ACCAAAAC	0.0167803	0.031998	0.024167	0.020638	0.0237274
ACCTAAAA	55	65	54	19	193			ACCTAAAA	0.0209754	0.0253643	0.0310718	0.0156849	0.0237274
ACTTGAAG	52	70	41	29	192			ACTTGAAG	0.0198313	0.0273154	0.0235916	0.02394	0.0236045
ATGTCAAC	56	70	40	26	192			ATGTCAAC	0.0213568	0.0273154	0.0230162	0.0214635	0.0236045
ACTCAAAC	49	77	47	18	191			ACTCAAAC	0.0186872	0.0300469	0.027044	0.0148593	0.0234815
ACCAAAAG	62	70	34	23	189			ACCAAAAG	0.023645	0.0273154	0.0195637	0.0189869	0.0232357
ACGGGAAC	59	55	47	28	189			ACGGGAAC	0.0225009	0.0214621	0.027044	0.0231145	0.0232357
AGCTAAAC	49	68	41	31	189			AGCTAAAC	0.0186872	0.0265349	0.0235916	0.0255911	0.0232357
AGGTGAAC	55	57	45	32	189			AGGTGAAC	0.0209754	0.0222425	0.0258932	0.0264166	0.0232357
ATGCCAAC	59	64	51	15	189			ATGCCAAC	0.0225009	0.0249741	0.0293456	0.0123828	0.0232357
AAACCAAG	61	75	28	24	188			AAACCAAG	0.0232636	0.0292665	0.0161113	0.0198124	0.0231127
AACCCAAA	61	71	30	25	187			AACCCAAA	0.0232636	0.0277056	0.0172621	0.020638	0.0229898
ACCGTAAA	64	58	44	21	187			ACCGTAAA	0.0244077	0.0226327	0.0253178	0.0173359	0.0229898
AACGAAAC	59	61	47	19	186			AACGAAAC	0.0225009	0.0238034	0.027044	0.0156849	0.0228668
AATCCAAC	68	41	50	27	186			AATCCAAC	0.0259332	0.015999	0.0287702	0.022289	0.0228668
ACCTCAAT	53	64	34	35	186			ACCTCAAT	0.0202127	0.0249741	0.0195637	0.0288931	0.0228668
ACTCTAAG	56	66	39	25	186			ACTCTAAG	0.0213568	0.0257545	0.0224407	0.020638	0.0228668
AGCTGAAG	49	64	46	27	186			AGCTGAAG	0.0186872	0.0249741	0.0264686	0.022289	0.0228668
ACGCGAAA	47	54	46	38	185			ACGCGAAA	0.0179244	0.0210719	0.0264686	0.0313697	0.0227439
AACCCAAT	54	70	33	27	184			AACCCAAT	0.020594	0.0273154	0.0189883	0.022289	0.022621
ACGGCAAG	54	54	47	29	184			ACGGCAAG	0.020594	0.0210719	0.027044	0.02394	0.022621
ATAGCAAC	48	53	32	49	182			ATAGCAAC	0.0183058	0.0206816	0.0184129	0.0404504	0.0223751
ACCATAAC	84	36	37	24	181			ACCATAAC	0.0320351	0.0140479	0.0212899	0.0198124	0.0222521
AGGCGAAC	48	53	43	37	181			AGGCGAAC	0.0183058	0.0206816	0.0247424	0.0305442	0.0222521
ATTGCAAC	67	50	31	33	181			ATTGCAAC	0.0255518	0.019511	0.0178375	0.0272421	0.0222521
ATCCGAAC	57	61	38	24	180			ATCCGAAC	0.0217381	0.0238034	0.0218653	0.0198124	0.0221292
ACACTAAG	47	58	38	35	178			ACACTAAG	0.0179244	0.0226327	0.0218653	0.0288931	0.0218833
AGCCGAAA	50	61	43	24	178			AGCCGAAA	0.0190685	0.0238034	0.0247424	0.0198124	0.0218833
AGGACAAC	52	48	53	25	178			AGGACAAC	0.0198313	0.0187305	0.0304964	0.020638	0.0218833
ACATCAAC	45	54	44	34	177			ACATCAAC	0.0171617	0.0210719	0.0253178	0.0280676	0.0217604
ACTGAAAG	45	70	34	28	177			ACTGAAAG	0.0171617	0.0273154	0.0195637	0.0231145	0.0217604
AGATCAAC	46	54	36	41	177			AGATCAAC	0.0175431	0.0210719	0.0207145	0.0338463	0.0217604
AGTCGAAC	58	51	39	29	177			AGTCGAAC	0.0221195	0.0199012	0.0224407	0.02394	0.0217604
AACACAAG	51	56	44	25	176			AACACAAG	0.0194499	0.0218523	0.0253178	0.020638	0.0216374
AGAAGAAC	50	45	50	31	176			AGAAGAAC	0.0190685	0.0175599	0.0287702	0.0255911	0.0216374
AGACCAAA	47	63	37	29	176			AGACCAAA	0.0179244	0.0245838	0.0212899	0.02394	0.0216374
AGTGTAAC	57	60	26	33	176			AGTGTAAC	0.0217381	0.0234132	0.0149605	0.0272421	0.0216374
AACGTAAC	47	54	41	33	175			AACGTAAC	0.0179244	0.0210719	0.0235916	0.0272421	0.0215145
ATCGGAAC	46	59	42	28	175			ATCGGAAC	0.0175431	0.023023	0.024167	0.0231145	0.0215145
AGCCAAAC	51	67	34	22	174			AGCCAAAC	0.0194499	0.0261447	0.0195637	0.0181614	0.0213916
AGTTCAAC	60	63	30	21	174			AGTTCAAC	0.0228822	0.0245838	0.0172621	0.0173359	0.0213916
AACGGAAC	49	64	35	25	173			AACGGAAC	0.0186872	0.0249741	0.0201391	0.020638	0.0212686
ACCTTAAG	52	48	38	34	172			ACCTTAAG	0.0198313	0.0187305	0.0218653	0.0280676	0.0211457
ACGCTAAG	53	62	29	28	172			ACGCTAAG	0.0202127	0.0241936	0.0166867	0.0231145	0.0211457
AACCTAAG	67	46	37	21	171			AACCTAAG	0.0255518	0.0179501	0.0212899	0.0173359	0.0210227
AACGCAAG	42	57	38	34	171			AACGCAAG	0.0160176	0.0222425	0.0218653	0.0280676	0.0210227
ACCCAAAA	56	63	26	25	170			ACCCAAAA	0.0213568	0.0245838	0.0149605	0.020638	0.0208998
ACGTCAAG	50	52	44	24	170			ACGTCAAG	0.0190685	0.0202914	0.0253178	0.0198124	0.0208998
AGACGAAG	52	52	33	33	170			AGACGAAG	0.0198313	0.0202914	0.0189883	0.0272421	0.0208998
AGCAGAAC	47	54	52	17	170			AGCAGAAC	0.0179244	0.0210719	0.029921	0.0140338	0.0208998
AGTCTAAC	55	51	36	28	170			AGTCTAAC	0.0209754	0.0199012	0.0207145	0.0231145	0.0208998
ATCACAAC	51	57	42	20	170			ATCACAAC	0.0194499	0.0222425	0.024167	0.0165104	0.0208998
AAGCCAAG	71	43	32	23	169			AAGCCAAG	0.0270773	0.0167794	0.0184129	0.0189869	0.0207769
ACCTGAAA	48	55	43	23	169			ACCTGAAA	0.0183058	0.0214621	0.0247424	0.0189869	0.0207769
ACGACAAG	46	55	40	28	169			ACGACAAG	0.0175431	0.0214621	0.0230162	0.0231145	0.0207769
ATCGCAAG	47	59	38	25	169			ATCGCAAG	0.0179244	0.023023	0.0218653	0.020638	0.0207769
ACTTGAAC	48	46	36	38	168			ACTTGAAC	0.0183058	0.0179501	0.0207145	0.0313697	0.0206539
AACTCAAG	51	42	38	35	166			AACTCAAG	0.0194499	0.0163892	0.0218653	0.0288931	0.020408
ACTTCAAG	51	43	41	31	166			ACTTCAAG	0.0194499	0.0167794	0.0235916	0.0255911	0.020408
AACAGAAC	48	46	42	28	164			AACAGAAC	0.0183058	0.0179501	0.024167	0.0231145	0.0201622
ACAAGAAC	56	37	35	36	164			ACAAGAAC	0.0213568	0.0144381	0.0201391	0.0297187	0.0201622
ACGTGAAC	40	55	43	25	163			ACGTGAAC	0.0152548	0.0214621	0.0247424	0.020638	0.0200392
ACTATAAC	41	59	34	29	163			ACTATAAC	0.0156362	0.023023	0.0195637	0.02394	0.0200392
AGCCCAAT	44	58	33	28	163			AGCCCAAT	0.0167803	0.0226327	0.0189883	0.0231145	0.0200392
AGCGGAAG	53	55	34	21	163			AGCGGAAG	0.0202127	0.0214621	0.0195637	0.0173359	0.0200392
AAGCGAAC	58	45	31	28	162			AAGCGAAC	0.0221195	0.0175599	0.0178375	0.0231145	0.0199163
AGTACAAC	43	39	30	50	162			AGTACAAC	0.0163989	0.0152186	0.0172621	0.0412759	0.0199163
ACCCAAAG	52	52	32	25	161			ACCCAAAG	0.0198313	0.0202914	0.0184129	0.020638	0.0197933
ACCGTAAG	50	50	27	34	161			ACCGTAAG	0.0190685	0.019511	0.0155359	0.0280676	0.0197933
ACTACAAG	51	47	35	28	161			ACTACAAG	0.0194499	0.0183403	0.0201391	0.0231145	0.0197933
ATCCCAAG	45	63	29	24	161			ATCCCAAG	0.0171617	0.0245838	0.0166867	0.0198124	0.0197933
AACTCAAC	44	44	50	22	160			AACTCAAC	0.0167803	0.0171697	0.0287702	0.0181614	0.0196704
AAGGCAAC	49	50	29	32	160			AAGGCAAC	0.0186872	0.019511	0.0166867	0.0264166	0.0196704
ACAACAAG	65	48	29	17	159			ACAACAAG	0.0247891	0.0187305	0.0166867	0.0140338	0.0195475
ACCGCAAT	43	51	33	32	159			ACCGCAAT	0.0163989	0.0199012	0.0189883	0.0264166	0.0195475
AGCTTAAC	51	50	38	20	159			AGCTTAAC	0.0194499	0.019511	0.0218653	0.0165104	0.0195475
AGGGCAAC	56	44	38	21	159			AGGGCAAC	0.0213568	0.0171697	0.0218653	0.0173359	0.0195475
ACTGAAAC	43	61	33	21	158			ACTGAAAC	0.0163989	0.0238034	0.0189883	0.0173359	0.0194245
AGCCTAAG	48	56	36	18	158			AGCCTAAG	0.0183058	0.0218523	0.0207145	0.0148593	0.0194245
ACTGTAAC	46	52	39	20	157			ACTGTAAC	0.0175431	0.0202914	0.0224407	0.0165104	0.0193016
AACGGAAG	44	42	45	25	156			AACGGAAG	0.0167803	0.0163892	0.0258932	0.020638	0.0191786
ACCACAAT	47	51	31	26	155			ACCACAAT	0.0179244	0.0199012	0.0178375	0.0214635	0.0190557
ACGGTAAC	43	37	45	29	154			ACGGTAAC	0.0163989	0.0144381	0.0258932	0.02394	0.0189328
ACACGAAG	54	45	34	19	152			ACACGAAG	0.020594	0.0175599	0.0195637	0.0156849	0.0186869
ACTGGAAC	44	47	36	25	152			ACTGGAAC	0.0167803	0.0183403	0.0207145	0.020638	0.0186869
ACCTAAAG	38	56	30	27	151			ACCTAAAG	0.0144921	0.0218523	0.0172621	0.022289	0.0185639
AGACGAAC	53	35	41	22	151			AGACGAAC	0.0202127	0.0136577	0.0235916	0.0181614	0.0185639
AGCCGAAG	44	50	35	22	151			AGCCGAAG	0.0167803	0.019511	0.0201391	0.0181614	0.0185639
AGCTCAAG	48	48	30	25	151			AGCTCAAG	0.0183058	0.0187305	0.0172621	0.020638	0.0185639
ACTCGAAG	49	43	36	22	150			ACTCGAAG	0.0186872	0.0167794	0.0207145	0.0181614	0.018441
AGGCTAAC	34	49	40	27	150			AGGCTAAC	0.0129666	0.0191208	0.0230162	0.022289	0.018441
AAACCAAC	54	51	18	26	149			AAACCAAC	0.020594	0.0199012	0.0103573	0.0214635	0.0183181
ACGCCAAT	36	50	32	31	149			ACGCCAAT	0.0137293	0.019511	0.0184129	0.0255911	0.0183181
ACTCCAAG	50	50	34	15	149			ACTCCAAG	0.0190685	0.019511	0.0195637	0.0123828	0.0183181
AGCGAAAC	48	35	40	24	147			AGCGAAAC	0.0183058	0.0136577	0.0230162	0.0198124	0.0180722
AAGACAAC	44	50	33	19	146			AAGACAAC	0.0167803	0.019511	0.0189883	0.0156849	0.0179492
ACCTAAAC	34	54	31	27	146			ACCTAAAC	0.0129666	0.0210719	0.0178375	0.022289	0.0179492
ACCTCAAA	39	49	27	31	146			ACCTCAAA	0.0148735	0.0191208	0.0155359	0.0255911	0.0179492
AACTGAAC	47	43	33	22	145			AACTGAAC	0.0179244	0.0167794	0.0189883	0.0181614	0.0178263
ACACCAAT	49	43	30	23	145			ACACCAAT	0.0186872	0.0167794	0.0172621	0.0189869	0.0178263
AACACAAC	42	36	33	33	144			AACACAAC	0.0160176	0.0140479	0.0189883	0.0272421	0.0177034
ACCGTAAC	31	46	33	33	143			ACCGTAAC	0.0118225	0.0179501	0.0189883	0.0272421	0.0175804
AGAGCAAG	41	49	37	16	143			AGAGCAAG	0.0156362	0.0191208	0.0212899	0.0132083	0.0175804
AGCTGAAC	41	45	34	23	143			AGCTGAAC	0.0156362	0.0175599	0.0195637	0.0189869	0.0175804
AAGCTAAC	36	49	31	26	142			AAGCTAAC	0.0137293	0.0191208	0.0178375	0.0214635	0.0174575
ACGCCAAA	35	41	38	27	141			ACGCCAAA	0.013348	0.015999	0.0218653	0.022289	0.0173345
AACCGAAG	45	43	35	17	140			AACCGAAG	0.0171617	0.0167794	0.0201391	0.0140338	0.0172116
AGACTAAC	40	40	36	24	140			AGACTAAC	0.0152548	0.0156088	0.0207145	0.0198124	0.0172116
AGCACAAG	44	47	34	15	140			AGCACAAG	0.0167803	0.0183403	0.0195637	0.0123828	0.0172116
AGCGGAAC	48	33	39	19	139			AGCGGAAC	0.0183058	0.0128772	0.0224407	0.0156849	0.0170887
ACCCGAAA	45	43	33	17	138			ACCCGAAA	0.0171617	0.0167794	0.0189883	0.0140338	0.0169657
ACGAGAAC	47	40	31	20	138			ACGAGAAC	0.0179244	0.0156088	0.0178375	0.0165104	0.0169657
ACGCGAAG	45	43	21	29	138			ACGCGAAG	0.0171617	0.0167794	0.0120835	0.02394	0.0169657
AGCCCAAA	43	40	36	19	138			AGCCCAAA	0.0163989	0.0156088	0.0207145	0.0156849	0.0169657
ACAGTAAC	39	38	42	18	137			ACAGTAAC	0.0148735	0.0148283	0.024167	0.0148593	0.0168428
ACCAGAAG	36	46	29	26	137			ACCAGAAG	0.0137293	0.0179501	0.0166867	0.0214635	0.0168428
ACCGCAAA	47	46	29	15	137			ACCGCAAA	0.0179244	0.0179501	0.0166867	0.0123828	0.0168428
AGCGTAAC	44	37	36	18	135			AGCGTAAC	0.0167803	0.0144381	0.0207145	0.0148593	0.0165969
ACCCCAAT	38	44	29	23	134			ACCCCAAT	0.0144921	0.0171697	0.0166867	0.0189869	0.016474
ATCCCAAC	36	44	37	17	134			ATCCCAAC	0.0137293	0.0171697	0.0212899	0.0140338	0.016474
ACTAGAAC	42	37	36	18	133			ACTAGAAC	0.0160176	0.0144381	0.0207145	0.0148593	0.016351
ACGTCAAC	34	48	30	20	132			ACGTCAAC	0.0129666	0.0187305	0.0172621	0.0165104	0.0162281
ACCACAAA	37	36	34	24	131			ACCACAAA	0.0141107	0.0140479	0.0195637	0.0198124	0.0161051
ACCTGAAG	36	42	28	25	131			ACCTGAAG	0.0137293	0.0163892	0.0161113	0.020638	0.0161051
ACTCTAAC	34	48	26	22	130			ACTCTAAC	0.0129666	0.0187305	0.0149605	0.0181614	0.0159822
ACTACAAC	32	42	34	21	129			ACTACAAC	0.0122039	0.0163892	0.0195637	0.0173359	0.0158593
ATCGCAAC	33	36	30	29	128			ATCGCAAC	0.0125852	0.0140479	0.0172621	0.02394	0.0157363
ACAGCAAG	41	42	27	17	127			ACAGCAAG	0.0156362	0.0163892	0.0155359	0.0140338	0.0156134
ACTCGAAC	42	29	32	24	127			ACTCGAAC	0.0160176	0.0113164	0.0184129	0.0198124	0.0156134
AGTCCAAC	30	37	29	30	126			AGTCCAAC	0.0114411	0.0144381	0.0166867	0.0247656	0.0154904
ACCTGAAC	55	29	15	26	125			ACCTGAAC	0.0209754	0.0113164	0.00863106	0.0214635	0.0153675
AGAACAAC	40	32	23	29	124			AGAACAAC	0.0152548	0.012487	0.0132343	0.02394	0.0152446
AGTGCAAC	31	29	38	26	124			AGTGCAAC	0.0118225	0.0113164	0.0218653	0.0214635	0.0152446
ACTTCAAC	38	31	26	28	123			ACTTCAAC	0.0144921	0.0120968	0.0149605	0.0231145	0.0151216
ACCGAAAG	36	42	25	18	121			ACCGAAAG	0.0137293	0.0163892	0.0143851	0.0148593	0.0148757
AGCCGAAC	35	41	28	17	121			AGCCGAAC	0.013348	0.015999	0.0161113	0.0140338	0.0148757
ACACCAAA	39	31	32	18	120			ACACCAAA	0.0148735	0.0120968	0.0184129	0.0148593	0.0147528
AACCGAAC	34	30	30	24	118			AACCGAAC	0.0129666	0.0117066	0.0172621	0.0198124	0.0145069
ACCTTAAC	31	39	30	18	118			ACCTTAAC	0.0118225	0.0152186	0.0172621	0.0148593	0.0145069
ACTGCAAC	30	51	27	10	118			ACTGCAAC	0.0114411	0.0199012	0.0155359	0.00825518	0.0145069
ACAACAAC	49	34	18	15	116			ACAACAAC	0.0186872	0.0132675	0.0103573	0.0123828	0.014261
ACCAGAAC	34	33	22	27	116			ACCAGAAC	0.0129666	0.0128772	0.0126589	0.022289	0.014261
AGACCAAG	36	42	21	17	116			AGACCAAG	0.0137293	0.0163892	0.0120835	0.0140338	0.014261
ACAGCAAC	40	36	27	12	115			ACAGCAAC	0.0152548	0.0140479	0.0155359	0.00990622	0.0141381
AGAGCAAC	35	35	20	25	115			AGAGCAAC	0.013348	0.0136577	0.0115081	0.020638	0.0141381
ACCCTAAA	36	35	30	13	114			ACCCTAAA	0.0137293	0.0136577	0.0172621	0.0107317	0.0140152
ACTGCAAG	35	41	25	13	114			ACTGCAAG	0.013348	0.015999	0.0143851	0.0107317	0.0140152
AACGCAAC	34	22	35	22	113			AACGCAAC	0.0129666	0.00858483	0.0201391	0.0181614	0.0138922
ACCCCAAA	52	28	18	15	113			ACCCCAAA	0.0198313	0.0109261	0.0103573	0.0123828	0.0138922
AGCCTAAC	40	28	25	19	112			AGCCTAAC	0.0152548	0.0109261	0.0143851	0.0156849	0.0137693
AGCGCAAG	34	37	21	20	112			AGCGCAAG	0.0129666	0.0144381	0.0120835	0.0165104	0.0137693
ACGGCAAC	37	39	19	15	110			ACGGCAAC	0.0141107	0.0152186	0.0109327	0.0123828	0.0135234
ACCCTAAG	31	34	31	13	109			ACCCTAAG	0.0118225	0.0132675	0.0178375	0.0107317	0.0134005
ACCGCAAG	30	45	22	12	109			ACCGCAAG	0.0114411	0.0175599	0.0126589	0.00990622	0.0134005
ACCGGAAC	36	34	24	15	109			ACCGGAAC	0.0137293	0.0132675	0.0138097	0.0123828	0.0134005
ACCTCAAG	37	40	22	10	109			ACCTCAAG	0.0141107	0.0156088	0.0126589	0.00825518	0.0134005
ACGACAAC	33	34	23	18	108			ACGACAAC	0.0125852	0.0132675	0.0132343	0.0148593	0.0132775
ACGCCAAG	38	24	29	17	108			ACGCCAAG	0.0144921	0.00936527	0.0166867	0.0140338	0.0132775
ACACCAAG	27	33	31	15	106			ACACCAAG	0.010297	0.0128772	0.0178375	0.0123828	0.0130316
ACACTAAC	36	30	23	17	106			ACACTAAC	0.0137293	0.0117066	0.0132343	0.0140338	0.0130316
AAGCCAAC	36	28	28	13	105			AAGCCAAC	0.0137293	0.0109261	0.0161113	0.0107317	0.0129087
ACACGAAC	30	31	29	15	105			ACACGAAC	0.0114411	0.0120968	0.0166867	0.0123828	0.0129087
ACGCTAAC	31	34	21	19	105			ACGCTAAC	0.0118225	0.0132675	0.0120835	0.0156849	0.0129087
AACCCAAG	29	37	26	10	102			AACCCAAG	0.0110598	0.0144381	0.0149605	0.00825518	0.0125399
AACCCAAC	27	29	23	22	101			AACCCAAC	0.010297	0.0113164	0.0132343	0.0181614	0.0124169
ACCCGAAG	33	33	19	16	101			ACCCGAAG	0.0125852	0.0128772	0.0109327	0.0132083	0.0124169
ACTCCAAC	33	29	15	24	101			ACTCCAAC	0.0125852	0.0113164	0.00863106	0.0198124	0.0124169
ACCACAAG	30	29	31	10	100			ACCACAAG	0.0114411	0.0113164	0.0178375	0.00825518	0.012294
AGCTCAAC	23	26	23	28	100			AGCTCAAC	0.00877153	0.0101457	0.0132343	0.0231145	0.012294
ACGCGAAC	27	28	21	20	96			ACGCGAAC	0.010297	0.0109261	0.0120835	0.0165104	0.0118022
AGGCCAAC	28	29	20	19	96			AGGCCAAC	0.0106784	0.0113164	0.0115081	0.0156849	0.0118022
AGCCCAAG	29	33	17	15	94			AGCCCAAG	0.0110598	0.0128772	0.00978186	0.0123828	0.0115564
ACCGAAAC	28	32	23	10	93			ACCGAAAC	0.0106784	0.012487	0.0132343	0.00825518	0.0114334
AACCTAAC	34	25	16	16	91			AACCTAAC	0.0129666	0.00975549	0.00920646	0.0132083	0.0111875
AGCACAAC	30	23	23	15	91			AGCACAAC	0.0114411	0.00897505	0.0132343	0.0123828	0.0111875
AGCGCAAC	27	32	18	13	90			AGCGCAAC	0.010297	0.012487	0.0103573	0.0107317	0.0110646
ACCCTAAC	28	21	21	19	89			ACCCTAAC	0.0106784	0.00819461	0.0120835	0.0156849	0.0109417
ACCCAAAC	19	42	13	13	87			ACCCAAAC	0.00724605	0.0163892	0.00748025	0.0107317	0.0106958
ACCCGAAC	29	23	19	16	87			ACCCGAAC	0.0110598	0.00897505	0.0109327	0.0132083	0.0106958
ACCACAAC	28	24	23	11	86			ACCACAAC	0.0106784	0.00936527	0.0132343	0.0090807	0.0105728
ACCGCAAC	30	21	16	19	86			ACCGCAAC	0.0114411	0.00819461	0.00920646	0.0156849	0.0105728
ACGCCAAC	24	31	20	11	86			ACGCCAAC	0.0091529	0.0120968	0.0115081	0.0090807	0.0105728
ACACCAAC	21	29	22	13	85			ACACCAAC	0.00800879	0.0113164	0.0126589	0.0107317	0.0104499
ACCGGAAG	23	23	22	15	83			ACCGGAAG	0.00877153	0.00897505	0.0126589	0.0123828	0.010204
ACCTCAAC	19	33	17	13	82			ACCTCAAC	0.00724605	0.0128772	0.00978186	0.0107317	0.0100811
ACCCCAAG	22	27	20	12	81			ACCCCAAG	0.00839016	0.0105359	0.0115081	0.00990622	0.00995814
AGCCCAAC	18	27	16	15	76			AGCCCAAC	0.00686467	0.0105359	0.00920646	0.0123828	0.00934344
AGACCAAC	26	24	16	9	75			AGACCAAC	0.00991564	0.00936527	0.00920646	0.00742967	0.0092205
ACCCCAAC	13	14	10	5	42			ACCCCAAC	0.00495782	0.00546307	0.00575404	0.00412759	0.00516348
	262212	256266	173791	121136	813405				100	100	100	100	100

## Sheet: Table S2a. Sorted by POU1
	Relative frequency
sequense	POU1	POU2
ATGCAAAT	5.3186	5.4111
ATGTAAAT	3.45026	2.8914
ATTTAAAT	2.82672	2.37642
ATGCTAAT	1.85346	1.82345
ATTTGAAT	1.84355	1.50065
ATTCAAAT	1.57582	1.29293
ATGCAAAA	1.49802	1.1721
ATGTTAAT	1.38552	1.31135
AATGCAAA	1.36378	1.1042
ATGGTAAT	1.26615	1.27797
ATGCAAAG	1.06288	0.830883
ATGGAAAT	0.942749	0.722707
ATTATAAT	0.940079	1.03515
AATTTAAA	0.913383	0.792906
AGGCAAAT	0.769988	0.546058
ATGTAAAA	0.713545	0.495998
ATTTTAAT	0.672357	0.678976
AATGTAAA	0.614007	0.508657
ATTAAAAT	0.614007	0.635821
AGTCAAAT	0.565954	0.367108
ACGCAAAT	0.564047	0.408537
AGGGAAAT	0.549174	0.364806
ATGCAAAC	0.543072	0.444787
ATGTAAAG	0.489299	0.393001
AAATTAAT	0.41455	0.477585
AGGTAAAT	0.378701	0.268714
AAGCAAAT	0.37832	0.27044
ATGAAAAT	0.372981	0.304389
AATTCAAA	0.372981	0.292305
ATTCAAAA	0.364972	0.277345
AATTAAAA	0.364209	0.39933
AAACAAAT	0.351624	0.265837
AAATTAAC	0.334081	0.330282
AATTAAAT	0.333318	0.389548
AAATTAAA	0.32836	0.348695
ATACAAAT	0.317682	0.268714
AATTTAAT	0.306241	0.333159
ATTTAAAA	0.30319	0.298635
AAATTAAG	0.302808	0.34179
AATCAAAT	0.295181	0.212324
AGGAAAAT	0.286791	0.200241
ATTCAAAG	0.280689	0.201391
AAATAAAT	0.261239	0.275043
ATTGAAAT	0.257425	0.290004
AAATGAAT	0.2559	0.273317
ATGTAAAC	0.248654	0.195637
AATGGAAA	0.241789	0.154784
ATTTCAAT	0.237975	0.267563
AGGCAAAA	0.236069	0.136371
ATGGAAAA	0.232636	0.162264
AGTAAAAT	0.225772	0.178951
AAGGCAAA	0.221958	0.117382
AGTTAAAT	0.218907	0.213475
ACGTAAAT	0.217381	0.172046
AATAAAAT	0.21433	0.21405
AGGGAAAA	0.204796	0.118533
ATTGCAAA	0.202127	0.166867
AAGGAAAT	0.199457	0.15651
AAGGGAAA	0.195643	0.145577
AGGGAAAG	0.194499	0.135795
AAGTAAAT	0.189923	0.146153
AAATAAAA	0.177337	0.177224
AAATGAAG	0.170473	0.188157
AACCAAAT	0.166278	0.120835
AATGAAAA	0.164371	0.152482
AGTCAAAA	0.163608	0.117382
ATATGAAA	0.159413	0.16399
AAAACAAA	0.158269	0.118533
AAGAAAAT	0.157888	0.124863
AAACAAAA	0.156362	0.115081
AAATAAAG	0.155981	0.150756
ATTCAAAC	0.153311	0.15018
ACGCAAAA	0.150641	0.0943662
AAATGAAA	0.15026	0.133494
ATGAAAAA	0.149116	0.122561
ATGGAAAG	0.148353	0.112204
AACGCAAA	0.147209	0.0978186
AGGCAAAG	0.145684	0.0782549
AAAGAAAT	0.14454	0.111628
ATACAAAA	0.143777	0.0857352
AAGCAAAA	0.14187	0.089763
ATTTGAAA	0.14187	0.0995449
AAGTCAAA	0.141107	0.112779
AAATCAAT	0.138819	0.1427
AGTGAAAT	0.138438	0.123712
ATGAAAAG	0.134624	0.105874
AGGAAAAA	0.134243	0.0909138
AAATCAAA	0.132717	0.116807
ATCCAAAT	0.131192	0.110478
ATAGGAAA	0.13081	0.111628
AGTCAAAG	0.116318	0.0748025
ACACAAAT	0.115555	0.0857352
AAACAAAG	0.114411	0.0742271
AGACAAAT	0.11403	0.0748025
AAGGAAAA	0.112504	0.095517
AAAAAAAA	0.110216	0.19276
AAAGCAAA	0.106402	0.0753779
ACGCAAAG	0.0980123	0.0609928
AGGCAAAC	0.0865712	0.0512109
AGCCAAAT	0.0858084	0.0701993
AAAATAAT	0.177719	0.212324
AAAAAAAT	0.130047	0.120259
ATTTAAAG	0.183439	0.18528
AAAATAAA	0.15293	0.159962
AAAATAAG	0.130429	0.125438
AATACAAA	0.134243	0.107601
AGGTAAAA	0.128522	0.10012
AATTTAAG	0.149879	0.142125
ATTGTAAA	0.115555	0.105874
AAGGTAAA	0.107928	0.109327
AAAGGAAA	0.102589	0.0903384
ATATTAAT	0.423703	0.558142
AAATAAAC	0.115555	0.119109
ACGGAAAT	0.0869525	0.0989695
AATCAAAA	0.122039	0.0989695
AATGAAAT	0.138819	0.15651
AACAAAAT	0.118988	0.09264
ACGAAAAT	0.106402	0.0949416
ATACAAAG	0.0983937	0.0937908
ATGATAAT	0.512944	0.582309
AATATAAT	0.213186	0.285976
ATTAGAAT	0.500358	0.609928
AGGAAAAG	0.100301	0.0799811
AAAGAAAA	0.098775	0.0891876
AAATCAAG	0.0980123	0.09264
AAGTAAAA	0.107547	0.0966678
ATATTAAA	0.297088	0.365381
ATAGTAAA	0.11975	0.114505
AATTGAAT	0.202508	0.237642
ACTCAAAT	0.0888594	0.0609928
ATTTTAAA	0.198313	0.204268
AGTGCAAA	0.0873339	0.0592666
AATGGAAT	0.137675	0.212324
AAGCAAAG	0.0846643	0.0500601
AATAAAAA	0.136531	0.131767
ATCTAAAT	0.17238	0.226709
AATCAAAG	0.0854271	0.0857352
AGTCAAAC	0.0762742	0.0420045
ATATGAAT	0.242933	0.315897
AACAAAAA	0.0831388	0.0661714
ATTCTAAT	0.448111	0.531673
AGGGTAAT	0.18649	0.279071
AAAAGAAA	0.106402	0.084009
ATGGGAAA	0.0980123	0.10012
AATAAAAG	0.106402	0.120835
ATAAGAAA	0.100301	0.095517
ATAATAAA	0.193736	0.251451
AATTTAAC	0.170473	0.146728
ACATAAAT	0.229967	0.250876
ATTTAAAC	0.136912	0.161113
ATTGTAAT	0.312343	0.357326
AGGTAAAG	0.0800879	0.0707747
ATTAAAAG	0.149116	0.170895
ATTAAAAA	0.171998	0.219229
AAAGTAAA	0.098775	0.0713501
ATAAAAAT	0.131192	0.124863
AATTGAAA	0.112886	0.131192
ACAAAAAT	0.0938172	0.0667468
ATGGCAAA	0.0774183	0.056965
AATTAAAG	0.186872	0.22038
AAAAAAAG	0.0922917	0.0937908
ATAATAAT	0.27268	0.353298
AAAGTAAT	0.102589	0.140399
AGCAAAAA	0.0831388	0.0604174
ATTGGAAA	0.0926731	0.0794057
ATGGAAAC	0.0804692	0.0615682
AAATGAAC	0.115174	0.102422
AGGGGAAA	0.101063	0.0794057
AAACAAAC	0.0659771	0.0506355
AATGTAAT	0.169329	0.181252
ATATAAAT	0.160176	0.22153
AATATAAA	0.156362	0.1778
AGCAAAAT	0.102207	0.0701993
ATCAAAAT	0.0949613	0.0932154
ATGGTAAA	0.181533	0.191034
AAGAAAAA	0.0934358	0.0920646
ACGCAAAC	0.0614007	0.0437307
ATCTTAAT	0.125852	0.176074
AGTAAAAA	0.0911476	0.0678976
ATTTCAAA	0.0865712	0.0851598
AAGTTAAT	0.164752	0.178375
ATCTGAAT	0.201364	0.231888
ATATAAAA	0.103351	0.101846
ATAACAAA	0.0980123	0.0909138
ATGGGAAT	0.117081	0.128315
AGGGAAAC	0.064833	0.0517863
AACAAAAC	0.0587311	0.0408537
AATCTAAT	0.115555	0.1427
ATTGGAAT	0.141107	0.179526
ATTTTAAG	0.107547	0.130617
AAATCAAC	0.0758928	0.0920646
ATGTTAAA	0.212424	0.215776
ATGAAAAC	0.0716977	0.0604174
AGTGAAAA	0.0697909	0.0684731
AGGATAAT	0.168185	0.208872
AGAATAAT	0.203271	0.300361
AATTCAAT	0.120895	0.124863
ATAATAAG	0.182295	0.258356
AAAAGAAT	0.0858084	0.0880368
AAGGTAAT	0.12242	0.163415
ATAAAAAG	0.091529	0.11393
ATTGAAAA	0.0900035	0.0759533
AGGTTAAT	0.173524	0.215776
ATGTGAAT	0.138438	0.158236
AATAGAAT	0.112886	0.136371
AGAAAAAT	0.09458	0.0886122
AAAACAAT	0.0736046	0.0604174
AGTAAAAG	0.0610193	0.0661714
ATTTGAAG	0.0713163	0.0604174
AATTAAAC	0.139963	0.193911
AAGAAAAG	0.0732232	0.0632944
AGATTAAT	0.146828	0.20657
ATGCGAAT	0.123564	0.164565
AAAGGAAT	0.0953427	0.124287
AAGTTAAA	0.0858084	0.0857352
AATGAAAG	0.07513	0.0880368
ATAGGAAT	0.0980123	0.132343
AGGGGAAT	0.110216	0.12141
AATGTAAG	0.104496	0.105874
AATGCAAT	0.0861898	0.0949416
ATAAGAAT	0.113648	0.143276
AATATAAG	0.101063	0.122561
ATATTAAG	0.196025	0.21405
AGTTTAAT	0.128522	0.155934
ATAGAAAT	0.078181	0.0960924
AAGCAAAC	0.060638	0.0385521
AAAACAAG	0.0640703	0.0431553
AGTATAAT	0.19183	0.289428
AATAGAAA	0.0758928	0.0972432
AAAGTAAG	0.0640703	0.0684731
ATCAAAAA	0.0610193	0.0701993
ATTACAAT	0.19488	0.260083
AGTGGAAT	0.0995378	0.12141
ATTATAAG	0.121276	0.162839
AACGTAAA	0.0816134	0.0638698
AGGAAAAC	0.0591125	0.0552388
ATGTTAAG	0.128141	0.145577
AGTTAAAA	0.0777996	0.0914892
ATAAAAAA	0.0995378	0.10012
ATATCAAA	0.0877153	0.0805565
ACATGAAA	0.0671213	0.0707747
ACGTAAAA	0.064833	0.0529371
AAGATAAT	0.137675	0.202542
ATACAAAC	0.064833	0.0512109
AAAATAAC	0.078181	0.0696239
ATCGCAAA	0.0514851	0.0477585
AGAAAAAA	0.0766555	0.0857352
AAACTAAT	0.103733	0.12889
AGTTTAAA	0.0880967	0.0937908
AGACAAAA	0.0675026	0.0489093
ACAAAAAA	0.0655958	0.0621436
ATATCAAT	0.116699	0.138672
ATTCGAAT	0.117081	0.136946
ATTACAAA	0.0919104	0.095517
AAAGAAAG	0.067884	0.0719255
AAGTGAAT	0.104877	0.122561
AAGGAAAG	0.057587	0.0523617
AGGTAAAC	0.0533919	0.0558142
AGCAAAAC	0.0480527	0.0448815
AAGTGAAA	0.0720791	0.0586912
ATGAGAAT	0.100682	0.134069
AAAAAAAC	0.0583497	0.0592666
AATCGAAT	0.0869525	0.09264
ATAGCAAA	0.0743673	0.0552388
ACATTAAT	0.165134	0.214626
ATGCTAAG	0.149116	0.155934
ATCAGAAT	0.0850457	0.116232
ATCGAAAT	0.0694095	0.0632944
ACATGAAT	0.151023	0.178951
AGATGAAT	0.118988	0.17147
AAGGGAAT	0.115174	0.120835
AATCAAAC	0.0526292	0.056965
AGTCTAAT	0.146828	0.165716
AAACCAAA	0.0537733	0.0506355
AGCATAAT	0.268866	0.277345
AGAATAAA	0.16132	0.181828
ATTAAAAC	0.108309	0.121986
AATAAAAC	0.07513	0.0966678
AGAGAAAT	0.067884	0.0707747
AACCAAAA	0.0522478	0.0448815
ACCCAAAT	0.0476713	0.0391275
AATGCAAG	0.0671213	0.0512109
ATACTAAT	0.170473	0.181828
ATGTCAAA	0.0743673	0.0673222
ATTTGAAC	0.0495782	0.0558142
ACGGTAAT	0.0983937	0.1427
AACGGAAA	0.0560615	0.0552388
AACAAAAG	0.0522478	0.0517863
ATTAGAAA	0.0995378	0.105874
ATGAGAAA	0.0755114	0.0765287
AAGAGAAT	0.0728418	0.0805565
AGCTAAAT	0.0652144	0.0632944
ACGTTAAT	0.111742	0.163415
ACATAAAA	0.103351	0.11393
AATCTAAA	0.106784	0.129466
AATCCAAA	0.0507223	0.0385521
ATGTCAAT	0.0827575	0.086886
ATCCAAAA	0.0591125	0.0414291
AGATGAAA	0.0629262	0.0558142
AGTGGAAA	0.0541547	0.0512109
AATTCAAG	0.101063	0.0886122
ATGATAAG	0.0842829	0.098394
ACTTAAAT	0.0766555	0.110478
AGGTGAAT	0.107547	0.118533
ATGGTAAG	0.0983937	0.127164
ATCATAAT	0.131192	0.16399
AAGACAAA	0.0537733	0.0471831
ACAAAAAC	0.0488155	0.0397029
ATAGTAAT	0.115937	0.148454
ACAGGAAA	0.0526292	0.0506355
ATACGAAA	0.0697909	0.0776795
ATAGAAAA	0.0766555	0.0771041
ATGCTAAA	0.273061	0.293456
ATTATAAA	0.152167	0.203693
ATATGAAG	0.054536	0.0822827
ATACGAAT	0.0907663	0.100696
AGAGGAAA	0.0690281	0.0667468
ATGTGAAA	0.0671213	0.0748025
AGTGTAAA	0.057587	0.0667468
AAGTAAAG	0.054536	0.054088
ATGGGAAG	0.0652144	0.0696239
ACAAAAAG	0.0549174	0.0489093
AGTGTAAT	0.0850457	0.104148
ATCGTAAT	0.0850457	0.108176
AGGGTAAA	0.0705536	0.0857352
AAAAGAAG	0.0629262	0.0759533
AGGCTAAT	0.13348	0.196788
AAACGAAT	0.0766555	0.0782549
AACGAAAT	0.0743673	0.0782549
AATACAAG	0.0636889	0.0661714
AGGGCAAA	0.0568242	0.0466077
AAAGGAAG	0.0560615	0.0609928
ATATTAAC	0.151404	0.189308
AGTTGAAT	0.0926731	0.119109
AACTAAAT	0.0777996	0.0811319
ACGTAAAG	0.0415694	0.0408537
ACATAAAG	0.0934358	0.107601
ACTAAAAT	0.0804692	0.0713501
AATACAAT	0.0797065	0.107025
AGTAAAAC	0.0427135	0.0391275
ATAGTAAG	0.0633076	0.0805565
ACATAAAC	0.0869525	0.105874
AGAGGAAT	0.0827575	0.115081
ATTTTAAC	0.081232	0.0920646
ACTTTAAA	0.0713163	0.0817073
ATGAGAAG	0.070935	0.0880368
AAAGCAAT	0.0499596	0.0454569
AGATTAAA	0.105258	0.109902
ATGCGAAA	0.0835202	0.09264
AACACAAA	0.0453831	0.0443061
ATGATAAA	0.103733	0.131192
AATGGAAG	0.101445	0.0759533
AAACGAAA	0.0568242	0.0558142
AAGAAAAC	0.04729	0.0345242
ACACAAAA	0.0453831	0.0374012
AGTTAAAG	0.054536	0.0563896
AAACTAAG	0.0484341	0.0477585
ATTGAAAG	0.0602566	0.0604174
AGGTCAAA	0.0587311	0.0402783
ACATTAAA	0.104114	0.125438
AGGAGAAT	0.0789438	0.0771041
AATTGAAG	0.0690281	0.0725009
AGTGAAAG	0.0469086	0.0408537
AATCTAAG	0.0552988	0.0586912
AGCAAAAG	0.044239	0.0322226
AGATAAAT	0.0892408	0.0886122
AACTTAAT	0.0995378	0.117382
ACTTGAAT	0.0827575	0.0960924
AATCGAAA	0.0621634	0.0512109
ATGCCAAT	0.064833	0.0857352
AGGATAAA	0.0549174	0.0834335
AAAACAAC	0.0362302	0.0345242
ATTCGAAA	0.0724605	0.0782549
AGAGTAAA	0.0564429	0.0385521
AATCCAAT	0.0507223	0.0552388
AAAGTAAC	0.0438576	0.0437307
AACGGAAT	0.0697909	0.0949416
AGGTGAAA	0.0587311	0.0466077
ATATAAAG	0.0724605	0.0880368
AGATAAAA	0.0541547	0.056965
AACGAAAA	0.0522478	0.0529371
AGAAGAAT	0.0514851	0.0736517
ATTCTAAG	0.0747487	0.0857352
AGGCGAAT	0.0617821	0.0690485
ACGGAAAA	0.0514851	0.0477585
ATTGTAAG	0.0507223	0.0684731
AATTCAAC	0.0690281	0.0707747
AATATAAC	0.0499596	0.0817073
ACTAGAAT	0.04729	0.0609928
AAACGAAG	0.0450018	0.0483339
ATTAGAAG	0.0785624	0.101271
AGTATAAA	0.0743673	0.0799811
AAGATAAA	0.0621634	0.0661714
ATAGGAAG	0.057587	0.0696239
ATCGGAAT	0.0716977	0.086886
ATTATAAC	0.0713163	0.112779
AGATTAAG	0.0655958	0.0880368
ATCAAAAG	0.0450018	0.0414291
AGTAGAAT	0.0716977	0.0891876
ATGTTAAC	0.0644517	0.0937908
AGGTTAAA	0.054536	0.0730763
ACGAAAAA	0.0430949	0.0408537
AGAGAAAA	0.0701722	0.0650206
ACGGGAAT	0.0640703	0.0725009
ATACGAAG	0.0480527	0.0552388
ATCTCAAA	0.0434763	0.0443061
ATTCCAAT	0.0766555	0.110478
AAGGCAAT	0.0518664	0.0489093
AGCATAAA	0.204415	0.212899
ATCCAAAG	0.0427135	0.0397029
AACTGAAT	0.088478	0.108176
ATAAAAAC	0.0659771	0.0632944
ATAAGAAG	0.0614007	0.0771041
ACTTTAAT	0.0823761	0.102997
ACTGGAAT	0.0739859	0.0765287
ACGTGAAT	0.0732232	0.107025
ATCTCAAT	0.0560615	0.0845844
AATAGAAG	0.0533919	0.0586912
AGACAAAG	0.0404253	0.0374012
ATATAAAC	0.0636889	0.0719255
ATTTCAAG	0.0541547	0.0494847
AGAAGAAA	0.0507223	0.0684731
ACCAAAAT	0.0446204	0.0397029
AACGTAAT	0.0770369	0.0822827
AGCGGAAT	0.0621634	0.0725009
ATAGAAAG	0.0461459	0.059842
ATCAGAAA	0.0446204	0.0529371
ATTCTAAA	0.09458	0.122561
AGGTTAAG	0.0522478	0.0638698
ACATTAAG	0.0949613	0.0874614
ATGACAAA	0.0621634	0.0638698
AGGAGAAA	0.0572056	0.054088
AAGTTAAG	0.0568242	0.0742271
ATCAAAAC	0.0465272	0.0443061
AACCAAAG	0.0335606	0.0379767
ATCACAAA	0.0331793	0.0374012
ACGATAAT	0.0896221	0.122561
AAGTCAAT	0.0667399	0.0730763
ATCTAAAA	0.0564429	0.0523617
AAGTAAAC	0.0476713	0.0489093
ACTGCAAA	0.0415694	0.0397029
ATCGTAAA	0.0552988	0.0552388
AAGCGAAT	0.0537733	0.054088
AAGAGAAA	0.0511037	0.0621436
AGGGTAAG	0.0503409	0.054088
ACAGTAAA	0.0480527	0.0414291
AGTTGAAA	0.0476713	0.0489093
AATCGAAG	0.0408067	0.0546634
AACATAAA	0.101445	0.124863
AAGCTAAT	0.0968682	0.136371
AGAATAAG	0.0686467	0.101271
ATTGCAAT	0.0560615	0.0609928
ATGCGAAG	0.0537733	0.0604174
AAACTAAA	0.0503409	0.0483339
AGGATAAG	0.0495782	0.0558142
AGTTTAAG	0.0499596	0.065596
AGATAAAC	0.0400439	0.0506355
AGAAAAAC	0.0400439	0.0368258
AACATAAT	0.133861	0.173772
ACAATAAT	0.0777996	0.0978186
ATCTTAAA	0.064833	0.0552388
AAGGGAAG	0.0499596	0.054088
AGCAGAAT	0.0434763	0.0621436
AAGGAAAC	0.0385185	0.0402783
AGACTAAT	0.0743673	0.101846
AACAGAAT	0.0644517	0.0678976
AGGGGAAG	0.0556801	0.0673222
AGGAGAAG	0.0450018	0.0471831
ACGGTAAA	0.0388998	0.0523617
ATCTTAAG	0.0461459	0.054088
ATCTAAAG	0.041188	0.0397029
ATACTAAA	0.064833	0.0886122
AGAGTAAT	0.064833	0.0776795
ATCCTAAT	0.0614007	0.0943662
AGTTAAAC	0.0461459	0.0592666
AGCCAAAA	0.0354675	0.0379767
ATAATAAC	0.0873339	0.100696
ATAACAAT	0.0621634	0.0880368
ATCCGAAT	0.0541547	0.0748025
ACGGGAAA	0.0491968	0.0563896
AGGACAAT	0.0419508	0.0345242
AGCTGAAT	0.0560615	0.0725009
AGCGAAAT	0.0526292	0.062719
ATGGGAAC	0.0495782	0.0443061
ATGGCAAT	0.054536	0.0719255
ATTACAAG	0.0514851	0.0874614
ACAGGAAT	0.0621634	0.0684731
AAAGGAAC	0.0434763	0.0443061
ACTATAAT	0.0594938	0.0748025
ACAGAAAT	0.0568242	0.0632944
ACTGAAAT	0.0522478	0.0638698
ACAGAAAA	0.0388998	0.0471831
ATCTGAAA	0.0373743	0.0460323
AGTCGAAT	0.0610193	0.0604174
AGAAAAAG	0.0533919	0.0581158
ACTAAAAA	0.0438576	0.0408537
AAGGTAAG	0.0415694	0.0477585
AAAAGAAC	0.0350861	0.0443061
ACTTAAAA	0.0587311	0.0523617
ACTGTAAT	0.0572056	0.0788303
ATTCGAAG	0.0564429	0.065596
AGTAGAAA	0.0511037	0.0707747
ATGCCAAA	0.0457645	0.0500601
AAGCCAAA	0.0305097	0.0414291
ACGCTAAT	0.107547	0.139823
AATGTAAC	0.0591125	0.0638698
AACTTAAA	0.0526292	0.0500601
ATGTGAAG	0.0484341	0.062719
AAGATAAG	0.0450018	0.0592666
AGTTCAAT	0.0446204	0.0431553
AATGCAAC	0.0434763	0.0408537
ACTCAAAA	0.0427135	0.0339488
ACGAAAAG	0.0320351	0.0368258
AGGGCAAT	0.044239	0.0558142
AAAGCAAG	0.0400439	0.0368258
ATATCAAG	0.0640703	0.0552388
ATGACAAT	0.057587	0.0736517
ACAATAAA	0.0480527	0.0494847
AGGACAAA	0.0450018	0.0460323
AAGCTAAA	0.0347047	0.0448815
AGCTTAAT	0.0644517	0.0972432
AATGGAAC	0.0438576	0.0466077
ATAGCAAT	0.0514851	0.0494847
AACTCAAA	0.0396626	0.0368258
ACGGCAAA	0.0327979	0.0304964
AGCATAAG	0.104877	0.12889
ATCGAAAA	0.0511037	0.0563896
ATACTAAG	0.0450018	0.0517863
AGAGGAAG	0.0358489	0.0431553
AGGTCAAT	0.0556801	0.0661714
ACAAGAAT	0.0453831	0.0517863
ACCGAAAT	0.0404253	0.0425799
AAACCAAT	0.0335606	0.0264686
AAACGAAC	0.0327979	0.0293456
AACCAAAC	0.0247891	0.0235916
AATGAAAC	0.0461459	0.0719255
AGAGCAAA	0.0373743	0.0293456
ACGTAAAC	0.0358489	0.029921
AAAGAAAC	0.0354675	0.0339488
ACTTGAAA	0.0316538	0.0420045
ATCGGAAA	0.0400439	0.0408537
AAGCGAAA	0.0358489	0.0391275
ATCATAAA	0.0736046	0.0943662
ACCAAAAA	0.0335606	0.032798
AATCCAAG	0.0324165	0.0339488
AGCTAAAA	0.0282214	0.0379767
AGTCCAAT	0.0385185	0.0466077
ACCTTAAT	0.0629262	0.0678976
AGACGAAT	0.0461459	0.0581158
AGCGAAAA	0.0388998	0.0385521
ACACAAAG	0.030891	0.0195637
AGATTAAC	0.088478	0.0863106
AGATCAAA	0.0392812	0.0483339
AGTGGAAG	0.0324165	0.035675
AGACAAAC	0.0312724	0.0264686
AACATAAG	0.0694095	0.0730763
ATTCCAAA	0.0480527	0.0563896
ACTATAAA	0.0438576	0.0402783
ATTTCAAC	0.0415694	0.0414291
AGTATAAG	0.0396626	0.0586912
ATACCAAA	0.0396626	0.054088
ACAGTAAT	0.0614007	0.0725009
ATTGAAAC	0.0430949	0.0322226
ACTGTAAA	0.0404253	0.0420045
ACGGAAAG	0.0396626	0.0443061
ATGTCAAG	0.0377557	0.0535126
AGTGTAAG	0.0320351	0.0443061
ACATTAAC	0.0983937	0.115081
ACTCGAAT	0.0484341	0.0517863
ATCTTAAC	0.0350861	0.0448815
AAGAGAAG	0.033942	0.0402783
ACCGGAAT	0.041188	0.0489093
AGTCTAAA	0.036993	0.0500601
AGTTGAAG	0.0354675	0.0316472
ACACAAAC	0.023645	0.0189883
ATACCAAT	0.0465272	0.0517863
ATAGCAAG	0.0320351	0.0362504
ATCACAAT	0.0450018	0.0517863
ACGTTAAG	0.036993	0.0414291
ATCTCAAG	0.0312724	0.0368258
AGAGTAAG	0.0305097	0.0466077
AACCTAAT	0.0533919	0.0874614
AATTGAAC	0.0491968	0.0575404
AACTAAAA	0.0430949	0.0477585
AGTACAAT	0.0415694	0.0425799
ATGCGAAC	0.0400439	0.035675
ACCTAAAT	0.0392812	0.0489093
AGGCGAAA	0.0388998	0.035675
AAGTGAAG	0.0381371	0.0408537
ACGTGAAA	0.0373743	0.0385521
ACAAGAAA	0.0366116	0.0437307
AGTTCAAA	0.0354675	0.035675
ACACGAAA	0.0331793	0.027044
AGCGTAAT	0.0591125	0.0748025
AAGACAAT	0.0476713	0.0477585
AATAGAAC	0.0381371	0.054088
AACTGAAA	0.0358489	0.0385521
ATCATAAG	0.0495782	0.0581158
ACACGAAT	0.0347047	0.0575404
ATCGTAAG	0.0343234	0.0448815
ATCGAAAG	0.0293656	0.0287702
AGAAGAAG	0.0289842	0.0546634
AGCTTAAG	0.0289842	0.0391275
ATCTAAAC	0.0228822	0.0374012
AGAGAAAG	0.044239	0.0500601
AGTTTAAC	0.0400439	0.0448815
ACTGGAAA	0.0362302	0.032798
ATAGGAAC	0.033942	0.0448815
ACAATAAG	0.033942	0.0420045
AGTACAAA	0.0335606	0.032798
ACCTTAAA	0.0209754	0.0230162
ACGTTAAA	0.041188	0.0506355
ATTGGAAG	0.030891	0.0546634
ACAACAAA	0.0301283	0.0264686
ACGTCAAA	0.0270773	0.0178375
ACCATAAT	0.0819947	0.0966678
ATATCAAC	0.0480527	0.0448815
ACATCAAT	0.0434763	0.056965
ATGTGAAC	0.0373743	0.0385521
AGTGCAAT	0.0347047	0.0454569
ACTCAAAG	0.0335606	0.024167
AAGTCAAG	0.0331793	0.0402783
ACTGCAAT	0.0301283	0.0212899
AAGGGAAC	0.0388998	0.0506355
AGGCTAAA	0.0381371	0.0414291
ACATCAAA	0.0373743	0.0391275
AACTTAAG	0.0350861	0.0420045
AGCCAAAG	0.0286028	0.0218653
ACTTCAAT	0.0255518	0.0379767
ACCTGAAT	0.0583497	0.065596
AGATAAAG	0.0438576	0.0494847
ACGGTAAG	0.0350861	0.0310718
ATCTGAAG	0.0297469	0.0408537
AGTTCAAG	0.0297469	0.0276194
AGTACAAG	0.0289842	0.0253178
ATCAGAAG	0.0270773	0.0362504
ACAGCAAA	0.0247891	0.0212899
AGATCAAT	0.0465272	0.0431553
ATAACAAG	0.0457645	0.0621436
ATTAGAAC	0.0427135	0.0563896
AACAGAAA	0.0419508	0.0408537
AGGGGAAC	0.0415694	0.0414291
ACGAGAAA	0.0381371	0.0437307
AAGTTAAC	0.0347047	0.0379767
ATGGCAAG	0.0354675	0.0414291
ATGCTAAC	0.0671213	0.0949416
AACATAAC	0.0526292	0.0506355
ACGAGAAT	0.0491968	0.0546634
AGCGTAAA	0.0427135	0.0454569
AATCGAAC	0.0366116	0.0333734
AGGGTAAC	0.033942	0.032798
AGACGAAA	0.030891	0.0471831
ATCCCAAA	0.0263146	0.0253178
AGTCTAAG	0.023645	0.0322226
ATCCAAAC	0.0232636	0.0178375
AGGTGAAG	0.0400439	0.0385521
ATAGAAAC	0.0327979	0.0454569
AATACAAC	0.041188	0.0402783
AGTAGAAG	0.0404253	0.0391275
ATGACAAG	0.0404253	0.0350996
ACGCGAAT	0.0388998	0.0512109
AGCAGAAA	0.0373743	0.0339488
ATTGTAAC	0.0362302	0.0374012
ACGGCAAT	0.0331793	0.0368258
AACGTAAG	0.0301283	0.0350996
ATTGCAAG	0.0270773	0.0397029
ACTTCAAA	0.0255518	0.0322226
ACCGTAAT	0.0453831	0.0529371
ATAAGAAC	0.0362302	0.0517863
AGAGCAAT	0.0354675	0.0443061
ACAGGAAG	0.0343234	0.0379767
ATGATAAC	0.033942	0.0489093
ACTTTAAG	0.0335606	0.029921
AGGGCAAG	0.0293656	0.0322226
ACTAAAAG	0.0282214	0.0368258
AGTCCAAA	0.0255518	0.029921
AGCGAAAG	0.0247891	0.024167
AGAGAAAC	0.0221195	0.0247424
ATTCTAAC	0.0503409	0.0494847
ATCGCAAT	0.0335606	0.0391275
ACTTAAAG	0.0327979	0.0437307
AAGGCAAG	0.0327979	0.0379767
ACTGAAAA	0.0312724	0.0362504
AACGAAAG	0.0312724	0.032798
ATCACAAG	0.0225009	0.0333734
AGCCTAAT	0.0503409	0.0811319
AGTCGAAA	0.0430949	0.0414291
AACCGAAT	0.041188	0.0362504
AGCGGAAA	0.0377557	0.0471831
ACGATAAA	0.036993	0.0431553
ATTCGAAC	0.0350861	0.0460323
AGGTTAAC	0.0320351	0.0293456
AGTGAAAC	0.0282214	0.0178375
AGCGCAAA	0.0263146	0.0304964
ATTCCAAG	0.0450018	0.0512109
ATACGAAC	0.0343234	0.0345242
ACAGTAAG	0.0327979	0.0253178
AGAACAAA	0.0320351	0.0523617
ACCAAAAC	0.0167803	0.024167
ACACTAAT	0.0568242	0.0811319
ACTCTAAT	0.0488155	0.0604174
ATGGTAAC	0.0453831	0.0621436
AGGCCAAT	0.033942	0.0443061
AGATGAAG	0.0327979	0.0368258
AATCTAAC	0.0327979	0.0339488
ATCGAAAC	0.0274587	0.0235916
AGAATAAC	0.0533919	0.0673222
AGGCTAAG	0.0362302	0.0414291
ATCCTAAG	0.0324165	0.029921
AGGCCAAG	0.0270773	0.0333734
ATCCGAAA	0.0305097	0.0374012
AAGTCAAC	0.0255518	0.0235916
AGCAGAAG	0.0232636	0.0207145
ACCATAAA	0.0625448	0.0661714
ATACTAAC	0.0347047	0.0293456
ACTTTAAC	0.0320351	0.0345242
ATTGGAAC	0.0312724	0.0425799
ATCCGAAG	0.0274587	0.029921
ACATGAAC	0.0244077	0.0333734
ATGAGAAC	0.0404253	0.0552388
ATATGAAC	0.0388998	0.0494847
ACATGAAG	0.0377557	0.0448815
ACTATAAG	0.0289842	0.0339488
AGACTAAG	0.0278401	0.032798
AAACTAAC	0.0255518	0.0316472
ACTAGAAG	0.0228822	0.0316472
ACTCAAAC	0.0186872	0.027044
AGACTAAA	0.0373743	0.0443061
AGGACAAG	0.0263146	0.0293456
ATGGCAAC	0.0263146	0.0218653
AGAACAAT	0.0377557	0.0414291
AACACAAT	0.0350861	0.0350996
ACCAGAAT	0.0320351	0.0437307
ACTCGAAA	0.0270773	0.035675
AGGATAAC	0.0263146	0.0437307
AACTAAAG	0.0240264	0.0310718
AAACCAAG	0.0232636	0.0161113
AACTCAAT	0.0377557	0.0437307
AGCTAAAG	0.0278401	0.0281948
ACGAAAAC	0.0255518	0.0258932
AACTAAAC	0.0225009	0.029921
ACGGAAAC	0.0198313	0.0189883
ACTACAAT	0.030891	0.0281948
AAGAGAAC	0.0270773	0.0391275
ACTCTAAA	0.0270773	0.029921
ATCCTAAA	0.026696	0.032798
AAGATAAC	0.0247891	0.0333734
ACTACAAA	0.0213568	0.0391275
AGCCGAAT	0.0312724	0.0368258
ACGCTAAA	0.0305097	0.0391275
ACAGAAAG	0.0297469	0.0235916
ACAGCAAT	0.0286028	0.0287702
AGTGGAAC	0.026696	0.0207145
AAAGCAAC	0.0255518	0.0258932
ACTTAAAC	0.0335606	0.0460323
AGGTCAAG	0.0297469	0.0420045
ATGACAAC	0.0259332	0.0207145
ACTCCAAA	0.0259332	0.0218653
AGCACAAA	0.0255518	0.024167
AACCCAAA	0.0232636	0.0172621
ACCCTAAT	0.036993	0.0517863
ACAAGAAG	0.0347047	0.0316472
AGATCAAG	0.0305097	0.0397029
ACACTAAA	0.0255518	0.0293456
AACAGAAG	0.0244077	0.0339488
ACCAAAAG	0.023645	0.0195637
ATGTCAAC	0.0213568	0.0230162
AACCCAAT	0.020594	0.0189883
ACTTGAAG	0.0198313	0.0235916
ACTGAAAG	0.0171617	0.0195637
ACGTCAAT	0.033942	0.0425799
ATTCCAAC	0.033942	0.0431553
ACAGAAAC	0.0278401	0.0258932
ACGAGAAG	0.0217381	0.0287702
AGGTCAAC	0.0198313	0.0287702
AACCGAAA	0.0270773	0.0293456
ACCGGAAA	0.0270773	0.0235916
ACATCAAG	0.0240264	0.0350996
ACTGTAAG	0.0225009	0.027044
AGCTAAAC	0.0186872	0.0235916
AGCTCAAT	0.036993	0.0316472
ACTAGAAA	0.0320351	0.0322226
AAGCCAAT	0.0282214	0.0247424
AGGAGAAC	0.0274587	0.0362504
AGACCAAT	0.0274587	0.0218653
AGCTGAAA	0.026696	0.0293456
AAGACAAG	0.0259332	0.0304964
AGTCCAAG	0.023645	0.0253178
AGCCAAAC	0.0194499	0.0195637
AGCTTAAA	0.036993	0.0437307
ATTACAAC	0.0312724	0.0420045
AGCGCAAT	0.0278401	0.0368258
ATCTGAAC	0.0274587	0.0264686
ACGTGAAG	0.0259332	0.0281948
AGTTGAAC	0.0259332	0.0253178
AGCACAAT	0.0232636	0.0310718
ACTCTAAG	0.0213568	0.0224407
ACGGGAAG	0.0331793	0.0339488
ACCAGAAA	0.0289842	0.024167
ATCTCAAC	0.0251705	0.027044
AAGTGAAC	0.0232636	0.0304964
ACCTAAAA	0.0209754	0.0310718
ATCCCAAT	0.0316538	0.0379767
ATGCCAAG	0.0305097	0.035675
ACGACAAT	0.0289842	0.029921
ATGCCAAC	0.0225009	0.0293456
ACCTCAAT	0.0202127	0.0195637
AGCTGAAG	0.0186872	0.0264686
AACGGAAC	0.0186872	0.0201391
AGTTCAAC	0.0228822	0.0172621
ACCCAAAA	0.0213568	0.0149605
AGACCAAA	0.0179244	0.0212899
ATCCCAAG	0.0171617	0.0166867
AACGCAAT	0.0347047	0.0350996
ACTCCAAT	0.0293656	0.0218653
AGGCCAAA	0.0289842	0.027044
AGTAGAAC	0.0270773	0.024167
AGCTCAAA	0.0251705	0.0212899
ATACCAAC	0.0244077	0.0276194
AGGCGAAG	0.0240264	0.0304964
AACCTAAA	0.020594	0.0391275
ACGCTAAG	0.0202127	0.0166867
ACCATAAG	0.0324165	0.0414291
AAGCGAAG	0.0270773	0.027044
ATACCAAG	0.0251705	0.0333734
ATCGTAAC	0.023645	0.0287702
AACGAAAC	0.0225009	0.027044
ATCCGAAC	0.0217381	0.0218653
ATCAGAAC	0.0213568	0.024167
AGCCGAAA	0.0190685	0.0247424
AGTGCAAG	0.0186872	0.0310718
ACTGAAAC	0.0163989	0.0189883
AAGGTAAC	0.0312724	0.0293456
AACTTAAC	0.0293656	0.0287702
ACGTTAAC	0.0240264	0.0316472
AGAGGAAC	0.0228822	0.0339488
AGTGTAAC	0.0217381	0.0149605
AGAGTAAC	0.020594	0.0322226
ATCATAAC	0.0324165	0.0374012
AGTCGAAG	0.0305097	0.035675
ATAGTAAC	0.0282214	0.0414291
ACAACAAT	0.0247891	0.0304964
ACTAAAAC	0.0232636	0.0310718
ATCGCAAG	0.0179244	0.0218653
ATCGGAAC	0.0175431	0.024167
ATCCTAAC	0.0171617	0.029921
ACTATAAC	0.0156362	0.0195637
AGTATAAC	0.0278401	0.032798
ACCGAAAA	0.0247891	0.0322226
ACCGTAAA	0.0244077	0.0253178
ACACTAAG	0.0179244	0.0218653
AGCCCAAT	0.0167803	0.0189883
ATAACAAC	0.0251705	0.0391275
ACAGGAAC	0.0244077	0.0264686
ACGACAAA	0.0217381	0.029921
AGGTGAAC	0.0209754	0.0258932
ATCACAAC	0.0194499	0.024167
AACGCAAG	0.0160176	0.0218653
ACCCGAAT	0.0232636	0.0385521
AGAACAAG	0.0221195	0.0333734
AACACAAG	0.0194499	0.0253178
AGCCTAAG	0.0183058	0.0207145
ACCTAAAG	0.0144921	0.0172621
ACGATAAG	0.0274587	0.0310718
AACTGAAG	0.0255518	0.0391275
ACGGGAAC	0.0225009	0.027044
AGCGTAAG	0.0213568	0.0293456
AGCGGAAG	0.0202127	0.0195637
ACCTGAAA	0.0183058	0.0247424
ACGACAAG	0.0175431	0.0230162
ACGTGAAC	0.0152548	0.0247424
ACAATAAC	0.0247891	0.0258932
ACTGGAAG	0.0209754	0.027044
ACGGCAAG	0.020594	0.027044
ACGCGAAA	0.0179244	0.0264686
AACGTAAC	0.0179244	0.0235916
AGCAGAAC	0.0179244	0.029921
AGATCAAC	0.0175431	0.0207145
ACATCAAC	0.0171617	0.0253178
ACCTAAAC	0.0129666	0.0178375
AGCATAAC	0.0819947	0.0989695
AGATGAAC	0.0286028	0.0362504
ATAGCAAC	0.0183058	0.0184129
AGGCGAAC	0.0183058	0.0247424
AGACGAAG	0.0198313	0.0189883
ACCCAAAG	0.0198313	0.0184129
ACGTCAAG	0.0190685	0.0253178
ACTGTAAC	0.0175431	0.0224407
AGTCGAAC	0.0221195	0.0224407
AGTCTAAC	0.0209754	0.0207145
AAACCAAC	0.020594	0.0103573
ACCACAAT	0.0179244	0.0178375
ACCGCAAT	0.0163989	0.0189883
ACTGCAAC	0.0114411	0.0155359
ATTGCAAC	0.0255518	0.0178375
AGCTTAAC	0.0194499	0.0218653
ACCGTAAG	0.0190685	0.0155359
ACTCCAAG	0.0190685	0.0195637
AAGGCAAC	0.0186872	0.0166867
AGCCGAAG	0.0167803	0.0201391
AAGACAAC	0.0167803	0.0189883
ACGCCAAT	0.0137293	0.0184129
AGCCTAAA	0.0270773	0.0316472
ACGATAAC	0.0251705	0.0293456
AGAGCAAG	0.0156362	0.0212899
ACCTCAAA	0.0148735	0.0155359
AAGCTAAC	0.0137293	0.0178375
AGGCTAAC	0.0129666	0.0230162
AAGCTAAG	0.0247891	0.0322226
ACAACAAG	0.0247891	0.0166867
AGGACAAC	0.0198313	0.0304964
ACCTTAAG	0.0198313	0.0218653
AGCTCAAG	0.0183058	0.0172621
ACGTCAAC	0.0129666	0.0172621
ACTCTAAC	0.0129666	0.0149605
ACTACAAG	0.0194499	0.0201391
ACTGGAAC	0.0167803	0.0207145
AGCACAAG	0.0167803	0.0195637
AACCTAAG	0.0255518	0.0212899
ACTTGAAC	0.0183058	0.0207145
AACAGAAC	0.0183058	0.024167
ACCGCAAA	0.0179244	0.0166867
ACCAGAAG	0.0137293	0.0166867
ACCGTAAC	0.0118225	0.0189883
AAGCGAAC	0.0221195	0.0178375
ACACGAAG	0.020594	0.0195637
AGAAGAAC	0.0190685	0.0287702
AGCTGAAC	0.0156362	0.0195637
ACCGCAAG	0.0114411	0.0126589
AGGGCAAC	0.0213568	0.0218653
AACTCAAC	0.0167803	0.0287702
ACCCCAAT	0.0144921	0.0166867
ATCCCAAC	0.0137293	0.0212899
AAGCCAAG	0.0270773	0.0184129
ACTTCAAG	0.0194499	0.0235916
ACTCGAAG	0.0186872	0.0207145
ACACCAAT	0.0186872	0.0172621
AACTGAAC	0.0179244	0.0189883
AACCGAAG	0.0171617	0.0201391
ACCCGAAA	0.0171617	0.0189883
ACGCGAAG	0.0171617	0.0120835
AACTCAAG	0.0194499	0.0218653
AACGGAAG	0.0167803	0.0258932
ACAGCAAG	0.0156362	0.0155359
ACCTGAAG	0.0137293	0.0161113
ACCGAAAG	0.0137293	0.0143851
AGACCAAG	0.0137293	0.0120835
ACTACAAC	0.0122039	0.0195637
ACCCAAAC	0.00724605	0.00748025
AATCCAAC	0.0259332	0.0287702
ACGCCAAA	0.013348	0.0218653
AGCCGAAC	0.013348	0.0161113
ACTGCAAG	0.013348	0.0143851
ACGAGAAC	0.0179244	0.0178375
AGCCCAAA	0.0163989	0.0207145
AGACTAAC	0.0152548	0.0207145
ACCTCAAG	0.0141107	0.0126589
AGTACAAC	0.0163989	0.0172621
ACGGCAAC	0.0141107	0.0109327
ACCTTAAC	0.0118225	0.0172621
ACAGTAAC	0.0148735	0.024167
ACAAGAAC	0.0213568	0.0201391
AGCGTAAC	0.0167803	0.0207145
ACGGTAAC	0.0163989	0.0258932
ACTAGAAC	0.0160176	0.0207145
AGCGCAAG	0.0129666	0.0120835
AGTCCAAC	0.0114411	0.0166867
AACCCAAG	0.0110598	0.0149605
ACCATAAC	0.0320351	0.0212899
AACACAAC	0.0160176	0.0189883
ACAGCAAC	0.0152548	0.0155359
ACCACAAA	0.0141107	0.0195637
ATCGCAAC	0.0125852	0.0172621
AGACGAAC	0.0202127	0.0235916
AGCGAAAC	0.0183058	0.0230162
ACCCTAAA	0.0137293	0.0172621
AGAGCAAC	0.013348	0.0115081
ACAACAAC	0.0186872	0.0103573
ACCGGAAC	0.0137293	0.0138097
ACGACAAC	0.0125852	0.0132343
ACCCTAAG	0.0118225	0.0178375
ACGCTAAC	0.0118225	0.0120835
AGCGGAAC	0.0183058	0.0224407
ACCAGAAC	0.0129666	0.0126589
ACCCGAAG	0.0125852	0.0109327
AGCCCAAG	0.0110598	0.00978186
ACACCAAG	0.010297	0.0178375
ACCTCAAC	0.00724605	0.00978186
AGAACAAC	0.0152548	0.0132343
ACCGAAAC	0.0106784	0.0132343
AGCGCAAC	0.010297	0.0103573
ACACCAAA	0.0148735	0.0184129
ACTTCAAC	0.0144921	0.0149605
ACACGAAC	0.0114411	0.0166867
ACGCCAAC	0.0091529	0.0115081
ACACTAAC	0.0137293	0.0132343
AACCGAAC	0.0129666	0.0172621
ACCTGAAC	0.0209754	0.00863106
ACTCGAAC	0.0160176	0.0184129
ACTCCAAC	0.0125852	0.00863106
AGTGCAAC	0.0118225	0.0218653
ACCACAAG	0.0114411	0.0178375
AGGCCAAC	0.0106784	0.0115081
AACCCAAC	0.010297	0.0132343
ACACCAAC	0.00800879	0.0126589
ACCCCAAA	0.0198313	0.0103573
AGCCTAAC	0.0152548	0.0143851
AAGCCAAC	0.0137293	0.0161113
ACGCGAAC	0.010297	0.0120835
ACCCCAAG	0.00839016	0.0115081
AGCCCAAC	0.00686467	0.00920646
AGCTCAAC	0.00877153	0.0132343
AACCTAAC	0.0129666	0.00920646
ACGCCAAG	0.0144921	0.0166867
ACCACAAC	0.0106784	0.0132343
AGACCAAC	0.00991564	0.00920646
AGCACAAC	0.0114411	0.0132343
ACCCGAAC	0.0110598	0.0109327
ACCGGAAG	0.00877153	0.0126589
AACGCAAC	0.0129666	0.0201391
ACCGCAAC	0.0114411	0.00920646
ACCCTAAC	0.0106784	0.0120835
ACCCCAAC	0.00495782	0.00575404
	100	100

## Sheet: Table S2b. Sorted by POU1+Bob1
	Relative frequency
sequense	POU1+BOB1	POU2+BOB1
ATGCAAAT	8.18446	12.6271
ATGCAAAA	3.15297	3.29217
AATGCAAA	2.57662	3.20962
ATGTAAAT	2.30073	3.57284
AGGCAAAT	2.22347	2.14552
ATGCAAAG	2.21723	2.27183
ATTTGAAT	1.92378	2.3164
ATTCAAAT	1.57141	1.94987
ATGCAAAC	1.34665	1.268
ACGCAAAT	1.27407	1.37696
AGTCAAAT	1.18197	1.04346
AGGGAAAT	0.962672	0.713248
ATGGAAAT	0.958379	0.981541
AAGCAAAT	0.90648	0.826344
AAACAAAT	0.760538	0.669495
ATTTAAAT	0.708639	0.832123
ATGTAAAA	0.630595	0.618313
ATGAAAAT	0.619278	0.518426
AGGTAAAT	0.55021	0.391296
AATGTAAA	0.547088	0.552272
ATACAAAT	0.526016	0.497788
AGGAAAAT	0.507285	0.346718
ATGTAAAG	0.488555	0.47715
AGGCAAAA	0.453825	0.203903
AAGGCAAA	0.442509	0.2782
AATTCAAA	0.438217	0.400376
ATTCAAAA	0.4269	0.2782
AATCAAAT	0.419486	0.301314
ATTGCAAA	0.322321	0.323603
ATTCAAAG	0.313737	0.241877
AATTTAAA	0.30281	0.312046
ATGTAAAC	0.293445	0.227018
ATGGAAAA	0.289153	0.146942
AAGGAAAT	0.287592	0.170882
AGGGAAAA	0.279787	0.118875
ACGCAAAA	0.277056	0.156849
AATGGAAA	0.267691	0.164278
AACGCAAA	0.26574	0.229494
AGTCAAAA	0.264959	0.114747
AAAACAAA	0.262228	0.124653
ATTTTAAT	0.257935	0.221239
AAGTCAAA	0.257935	0.165104
AGGCAAAG	0.257545	0.130432
AACCAAAT	0.256764	0.179963
AAACAAAA	0.255594	0.139513
AAGGGAAA	0.254813	0.136211
ATGCTAAT	0.24857	0.283153
AAATTAAT	0.243887	0.28728
AAATTAAG	0.238424	0.319476
AGTAAAAT	0.236473	0.147768
AAATAAAT	0.232181	0.220413
ACGTAAAT	0.23179	0.146942
ATTAAAAT	0.227888	0.203903
AAGTAAAT	0.227108	0.146942
ATATGAAA	0.225937	0.238575
AAGAAAAT	0.225937	0.0957601
AGGGAAAG	0.222035	0.141989
AGTTAAAT	0.216572	0.12713
AAATTAAA	0.21345	0.217111
ATAGGAAA	0.21345	0.146117
AAATGAAA	0.209548	0.146942
ATCCAAAT	0.208767	0.132908
ATGTTAAT	0.207597	0.240226
ATGAAAAA	0.204475	0.121351
AAGCAAAA	0.204085	0.106492
AATGAAAA	0.202134	0.113922
ATGGTAAT	0.201744	0.218762
ATTCAAAC	0.199402	0.125479
ATGGAAAG	0.199402	0.128781
AAATAAAA	0.198622	0.170882
AGTGAAAT	0.1955	0.120526
ATACAAAA	0.19511	0.104841
AAATCAAA	0.194329	0.136211
AATTAAAT	0.189647	0.173359
ATTGAAAT	0.189256	0.137036
AAATTAAC	0.188476	0.195648
AGTCAAAG	0.186915	0.0965857
AGACAAAT	0.186915	0.104841
AAATGAAG	0.185744	0.199775
AATAAAAT	0.184964	0.164278
AATTTAAT	0.182233	0.161802
AAATGAAT	0.181062	0.238575
AGGAAAAA	0.180281	0.102364
AAAGCAAA	0.179111	0.090807
ATTTAAAA	0.17794	0.137036
ATTTGAAA	0.17794	0.0932836
ATGAAAAG	0.175209	0.0866794
ACACAAAT	0.174818	0.0916325
ATTTCAAT	0.174428	0.141989
AAAAAAAA	0.173648	0.129606
AAGGAAAA	0.170136	0.0998877
AAATAAAG	0.167794	0.170882
AGCCAAAT	0.166624	0.089156
AAACAAAG	0.164673	0.089156
ATTATAAT	0.163112	0.207205
ACGCAAAG	0.162722	0.0809008
AAATCAAT	0.161941	0.147768
AAAGAAAT	0.16038	0.0957601
AGGCAAAC	0.157258	0.0817263
AATTAAAA	0.156478	0.15107
AAAATAAT	0.152576	0.155197
AAAAAAAT	0.152186	0.1197
ATTTAAAG	0.151795	0.0759477
AAAATAAA	0.147893	0.104841
AAAATAAG	0.147893	0.113922
AATACAAA	0.147503	0.121351
AGGTAAAA	0.145942	0.0850284
AATTTAAG	0.143601	0.1197
ATTGTAAA	0.143601	0.0924581
AAGGTAAA	0.143601	0.0932836
AAAGGAAA	0.143601	0.0932836
ATATTAAT	0.14243	0.177486
AAATAAAC	0.14204	0.130432
ACGGAAAT	0.14204	0.0792498
AATCAAAA	0.14165	0.0792498
AATGAAAT	0.140089	0.120526
AACAAAAT	0.140089	0.0982367
ACGAAAAT	0.138918	0.0833774
ATACAAAG	0.138918	0.0899815
ATGATAAT	0.137747	0.135385
AATATAAT	0.137357	0.132908
ATTAGAAT	0.133455	0.179963
AGGAAAAG	0.132675	0.0701691
AAAGAAAA	0.132284	0.0693435
AAATCAAG	0.132284	0.127955
AAGTAAAA	0.131504	0.0693435
ATATTAAA	0.130724	0.139513
ATAGTAAA	0.128382	0.106492
AATTGAAT	0.127212	0.124653
ACTCAAAT	0.126821	0.0767732
ATTTTAAA	0.126431	0.10319
AGTGCAAA	0.125651	0.0742967
AATGGAAT	0.12526	0.146942
AAGCAAAG	0.12526	0.0536587
AATAAAAA	0.12487	0.0957601
ATCTAAAT	0.122919	0.123002
AATCAAAG	0.122139	0.0916325
AGTCAAAC	0.122139	0.0544842
ATATGAAT	0.121748	0.141164
AACAAAAA	0.120968	0.0726456
ATTCTAAT	0.120188	0.151895
AGGGTAAT	0.119797	0.128781
AAAAGAAA	0.119017	0.0701691
ATGGGAAA	0.118237	0.0784243
AATAAAAG	0.117846	0.100713
ATAAGAAA	0.117846	0.0825518
ATAATAAA	0.117456	0.0998877
AATTTAAC	0.117066	0.0982367
ACATAAAT	0.116676	0.176661
ATTTAAAC	0.116676	0.108968
ATTGTAAT	0.115895	0.137036
AGGTAAAG	0.115505	0.0709946
ATTAAAAG	0.114725	0.101539
ATTAAAAA	0.114334	0.0899815
AAAGTAAA	0.114334	0.0759477
ATAAAAAT	0.113944	0.0899815
AATTGAAA	0.113944	0.0817263
ACAAAAAT	0.113554	0.0767732
ATGGCAAA	0.112773	0.0775987
AATTAAAG	0.112383	0.120526
AAAAAAAG	0.111213	0.0842029
ATAATAAT	0.110432	0.142815
AAAGTAAT	0.110432	0.0941091
AGCAAAAA	0.110432	0.0643904
ATTGGAAA	0.110042	0.0734711
ATGGAAAC	0.110042	0.0660415
AAATGAAC	0.109652	0.141164
AGGGGAAA	0.109261	0.0825518
AAACAAAC	0.109261	0.0511821
AATGTAAT	0.108871	0.137036
ATATAAAT	0.107701	0.115573
AATATAAA	0.10731	0.100713
AGCAAAAT	0.10731	0.0759477
ATCAAAAT	0.105749	0.0742967
ATGGTAAA	0.105359	0.106492
AAGAAAAA	0.105359	0.066867
ACGCAAAC	0.103408	0.0511821
ATCTTAAT	0.103018	0.13456
AGTAAAAA	0.102628	0.0577863
ATTTCAAA	0.102628	0.0751222
AAGTTAAT	0.102238	0.102364
ATCTGAAT	0.101847	0.126304
ATATAAAA	0.101067	0.0701691
ATAACAAA	0.100286	0.0883305
ATGGGAAT	0.099506	0.116398
AGGGAAAC	0.0991158	0.0412759
AACAAAAC	0.0987255	0.0635649
AATCTAAT	0.0971647	0.0949346
ATTGGAAT	0.0967744	0.0965857
ATTTTAAG	0.0963842	0.100713
AAATCAAC	0.095994	0.0916325
ATGTTAAA	0.0956038	0.089156
ATGAAAAC	0.0956038	0.0586118
AGTGAAAA	0.0956038	0.068518
AGGATAAT	0.0952136	0.105666
AGAATAAT	0.0948233	0.122177
AATTCAAT	0.0948233	0.125479
ATAATAAG	0.0940429	0.126304
AAAAGAAT	0.0936527	0.0817263
AAGGTAAT	0.092482	0.127955
ATAAAAAG	0.092482	0.0734711
ATTGAAAA	0.092482	0.0627394
AGGTTAAT	0.0920918	0.108143
ATGTGAAT	0.0920918	0.133734
AATAGAAT	0.0920918	0.120526
AGAAAAAT	0.0920918	0.0899815
AAAACAAT	0.0913114	0.0734711
AGTAAAAG	0.0913114	0.0577863
ATTTGAAG	0.0909212	0.0544842
AATTAAAC	0.0905309	0.0965857
AAGAAAAG	0.0905309	0.065216
AGATTAAT	0.0901407	0.106492
ATGCGAAT	0.0901407	0.127955
AAAGGAAT	0.0901407	0.0924581
AAGTTAAA	0.0901407	0.0709946
AATGAAAG	0.0901407	0.0718201
ATAGGAAT	0.0897505	0.106492
AGGGGAAT	0.0889701	0.109794
AATGTAAG	0.0889701	0.0957601
AATGCAAT	0.0889701	0.0916325
ATAAGAAT	0.0885798	0.089156
AATATAAG	0.0885798	0.0965857
ATATTAAG	0.0881896	0.117224
AGTTTAAT	0.0881896	0.110619
ATAGAAAT	0.0877994	0.089156
AAGCAAAC	0.0877994	0.0569608
AAAACAAG	0.087019	0.0751222
AGTATAAT	0.0866287	0.120526
AATAGAAA	0.0858483	0.0709946
AAAGTAAG	0.0850679	0.0833774
ATCAAAAA	0.0850679	0.0635649
ATTACAAT	0.0846776	0.0965857
AGTGGAAT	0.0846776	0.104015
ATTATAAG	0.0842874	0.0965857
AACGTAAA	0.0842874	0.0577863
AGGAAAAC	0.0838972	0.0635649
ATGTTAAG	0.083507	0.0965857
AGTTAAAA	0.0831168	0.0536587
ATAAAAAA	0.0823363	0.0800753
ATATCAAA	0.0823363	0.0726456
ACATGAAA	0.0823363	0.0619139
ACGTAAAA	0.0823363	0.0536587
AAGATAAT	0.0819461	0.128781
ATACAAAC	0.0819461	0.0528332
AAAATAAC	0.0815559	0.0734711
ATCGCAAA	0.0815559	0.0412759
AGAAAAAA	0.0811657	0.0561353
AAACTAAT	0.0807754	0.0924581
AGTTTAAA	0.0807754	0.0751222
AGACAAAA	0.0807754	0.0321952
ACAAAAAA	0.0807754	0.0528332
ATATCAAT	0.0803852	0.0775987
ATTCGAAT	0.079995	0.101539
ATTACAAA	0.079995	0.068518
AAAGAAAG	0.079995	0.0619139
AAGTGAAT	0.0796048	0.066867
AAGGAAAG	0.0792146	0.0643904
AGGTAAAC	0.0792146	0.0536587
AGCAAAAC	0.0792146	0.044578
AAGTGAAA	0.0788243	0.0627394
ATGAGAAT	0.0784341	0.106492
AAAAAAAC	0.0784341	0.0511821
AATCGAAT	0.0780439	0.0916325
ATAGCAAA	0.0780439	0.0454035
ACATTAAT	0.0776537	0.101539
ATGCTAAG	0.0776537	0.0726456
ATCAGAAT	0.0776537	0.0784243
ATCGAAAT	0.0776537	0.0511821
ACATGAAT	0.0772635	0.0924581
AGATGAAT	0.076483	0.0899815
AAGGGAAT	0.076483	0.090807
AATCAAAC	0.076483	0.0404504
AGTCTAAT	0.0760928	0.0957601
AAACCAAA	0.0760928	0.044578
AGCATAAT	0.0757026	0.105666
AGAATAAA	0.0757026	0.089156
ATTAAAAC	0.0757026	0.0718201
AATAAAAC	0.0757026	0.0726456
AGAGAAAT	0.0753124	0.0784243
AACCAAAA	0.0753124	0.0387994
ACCCAAAT	0.0753124	0.0354973
AATGCAAG	0.0749222	0.0643904
ATACTAAT	0.0745319	0.109794
ATGTCAAA	0.0745319	0.065216
ATTTGAAC	0.0745319	0.0553097
ACGGTAAT	0.0741417	0.108968
AACGGAAA	0.0741417	0.0561353
AACAAAAG	0.0741417	0.0454035
ATTAGAAA	0.0737515	0.089156
ATGAGAAA	0.0737515	0.0792498
AAGAGAAT	0.0737515	0.0553097
AGCTAAAT	0.0737515	0.0478801
ACGTTAAT	0.0729711	0.101539
ACATAAAA	0.0729711	0.0924581
AATCTAAA	0.0725808	0.066867
AATCCAAA	0.0725808	0.0371483
ATGTCAAT	0.0721906	0.0742967
ATCCAAAA	0.0721906	0.044578
AGATGAAA	0.0718004	0.0610884
AGTGGAAA	0.0718004	0.0520077
AATTCAAG	0.0714102	0.0817263
ATGATAAG	0.0714102	0.0767732
ACTTAAAT	0.0714102	0.0569608
AGGTGAAT	0.07102	0.101539
ATGGTAAG	0.07102	0.0899815
ATCATAAT	0.0706297	0.0635649
AAGACAAA	0.0706297	0.0437525
ACAAAAAC	0.0706297	0.0404504
ATAGTAAT	0.0702395	0.0866794
ACAGGAAA	0.0702395	0.0602628
ATACGAAA	0.0698493	0.0693435
ATAGAAAA	0.0694591	0.0619139
ATGCTAAA	0.0690689	0.0817263
ATTATAAA	0.0690689	0.0800753
ATATGAAG	0.0690689	0.0734711
ATACGAAT	0.0686786	0.0759477
AGAGGAAA	0.0686786	0.0619139
ATGTGAAA	0.0686786	0.0718201
AGTGTAAA	0.0686786	0.0520077
AAGTAAAG	0.0686786	0.0544842
ATGGGAAG	0.0682884	0.0734711
ACAAAAAG	0.0682884	0.042927
AGTGTAAT	0.0678982	0.0866794
ATCGTAAT	0.0678982	0.0767732
AGGGTAAA	0.0678982	0.0965857
AAAAGAAG	0.0678982	0.0709946
AGGCTAAT	0.067508	0.090807
AAACGAAT	0.067508	0.0792498
AACGAAAT	0.067508	0.0635649
AATACAAG	0.067508	0.0478801
AGGGCAAA	0.067508	0.046229
AAAGGAAG	0.067508	0.0701691
ATATTAAC	0.0667275	0.0751222
AGTTGAAT	0.0667275	0.0833774
AACTAAAT	0.0667275	0.0594373
ACGTAAAG	0.0667275	0.0478801
ACATAAAG	0.0663373	0.0759477
ACTAAAAT	0.0663373	0.0528332
AATACAAT	0.0663373	0.0982367
AGTAAAAC	0.0663373	0.0454035
ATAGTAAG	0.0655569	0.0619139
ACATAAAC	0.0651667	0.0751222
AGAGGAAT	0.0651667	0.0858539
ATTTTAAC	0.0651667	0.065216
ACTTTAAA	0.0651667	0.0495311
ATGAGAAG	0.0651667	0.0553097
AAAGCAAT	0.0651667	0.0371483
AGATTAAA	0.0647764	0.0709946
ATGCGAAA	0.0647764	0.0742967
AACACAAA	0.0647764	0.0437525
ATGATAAA	0.0643862	0.0619139
AATGGAAG	0.0643862	0.0792498
AAACGAAA	0.0643862	0.0520077
AAGAAAAC	0.0643862	0.0354973
ACACAAAA	0.0643862	0.0363228
AGTTAAAG	0.063996	0.0528332
AAACTAAG	0.0636058	0.0520077
ATTGAAAG	0.0632156	0.0610884
AGGTCAAA	0.0632156	0.0421014
ACATTAAA	0.0624351	0.0610884
AGGAGAAT	0.0624351	0.0701691
AATTGAAG	0.0624351	0.0520077
AGTGAAAG	0.0624351	0.0503566
AATCTAAG	0.0620449	0.0544842
AGCAAAAG	0.0620449	0.042927
AGATAAAT	0.0616547	0.0627394
AACTTAAT	0.0612645	0.0676925
ACTTGAAT	0.0612645	0.0709946
AATCGAAA	0.0612645	0.0437525
ATGCCAAT	0.0608742	0.0627394
AGGATAAA	0.0608742	0.0718201
AAAACAAC	0.0608742	0.046229
ATTCGAAA	0.060484	0.0577863
AGAGTAAA	0.060484	0.0511821
AATCCAAT	0.060484	0.0503566
AAAGTAAC	0.060484	0.0536587
AACGGAAT	0.0600938	0.0627394
AGGTGAAA	0.0600938	0.0470546
ATATAAAG	0.0597036	0.0602628
AGATAAAA	0.0597036	0.046229
AACGAAAA	0.0597036	0.046229
AGAAGAAT	0.0597036	0.0602628
ATTCTAAG	0.0593134	0.0701691
AGGCGAAT	0.0593134	0.0742967
ACGGAAAA	0.0593134	0.044578
ATTGTAAG	0.0593134	0.0594373
AATTCAAC	0.0589232	0.0511821
AATATAAC	0.0589232	0.0577863
ACTAGAAT	0.0589232	0.0437525
AAACGAAG	0.0589232	0.0528332
ATTAGAAG	0.0585329	0.0660415
AGTATAAA	0.0585329	0.0478801
AAGATAAA	0.0585329	0.0404504
ATAGGAAG	0.0585329	0.0561353
ATCGGAAT	0.0581427	0.0767732
ATTATAAC	0.0581427	0.0569608
AGATTAAG	0.0581427	0.0619139
ATCAAAAG	0.0581427	0.0387994
AGTAGAAT	0.0577525	0.0825518
ATGTTAAC	0.0577525	0.0586118
AGGTTAAA	0.0577525	0.0520077
ACGAAAAA	0.0577525	0.0354973
AGAGAAAA	0.0573623	0.0503566
ACGGGAAT	0.0573623	0.0759477
ATACGAAG	0.0573623	0.0387994
ATCTCAAA	0.0573623	0.0379738
ATTCCAAT	0.0569721	0.0751222
AAGGCAAT	0.0569721	0.0495311
AGCATAAA	0.0565818	0.0866794
ATCCAAAG	0.0565818	0.044578
AACTGAAT	0.0561916	0.0734711
ATAAAAAC	0.0561916	0.0495311
ATAAGAAG	0.0561916	0.0635649
ACTTTAAT	0.0558014	0.0660415
ACTGGAAT	0.0558014	0.0817263
ACGTGAAT	0.0558014	0.0784243
ATCTCAAT	0.0558014	0.0767732
AATAGAAG	0.0558014	0.0569608
AGACAAAG	0.0558014	0.0247656
ATATAAAC	0.055021	0.065216
ATTTCAAG	0.055021	0.0561353
AGAAGAAA	0.055021	0.0470546
ACCAAAAT	0.055021	0.0536587
AACGTAAT	0.0546307	0.0709946
AGCGGAAT	0.0546307	0.0635649
ATAGAAAG	0.0546307	0.0487056
ATCAGAAA	0.0546307	0.0437525
ATTCTAAA	0.0542405	0.0726456
AGGTTAAG	0.0542405	0.0520077
ACATTAAG	0.0538503	0.0487056
ATGACAAA	0.0538503	0.0478801
AGGAGAAA	0.0538503	0.0470546
AAGTTAAG	0.0538503	0.0635649
ATCAAAAC	0.0538503	0.0346718
AACCAAAG	0.0538503	0.0231145
ATCACAAA	0.0538503	0.0437525
ACGATAAT	0.0534601	0.0850284
AAGTCAAT	0.0534601	0.0676925
ATCTAAAA	0.0534601	0.066867
AAGTAAAC	0.0534601	0.0487056
ACTGCAAA	0.0534601	0.0264166
ATCGTAAA	0.0530699	0.0470546
AAGCGAAT	0.0530699	0.042927
AAGAGAAA	0.0530699	0.0379738
AGGGTAAG	0.0530699	0.0775987
ACAGTAAA	0.0530699	0.0338463
AGTTGAAA	0.0530699	0.0511821
AATCGAAG	0.0530699	0.0495311
AACATAAA	0.0526796	0.0627394
AAGCTAAT	0.0526796	0.0643904
AGAATAAG	0.0526796	0.0701691
ATTGCAAT	0.0522894	0.0478801
ATGCGAAG	0.0522894	0.0569608
AAACTAAA	0.0522894	0.0470546
AGGATAAG	0.0522894	0.0478801
AGTTTAAG	0.0518992	0.0503566
AGATAAAC	0.0518992	0.0487056
AGAAAAAC	0.0518992	0.0396249
AACATAAT	0.051509	0.0709946
ACAATAAT	0.051509	0.0528332
ATCTTAAA	0.051509	0.0635649
AAGGGAAG	0.0511188	0.0387994
AGCAGAAT	0.0511188	0.0561353
AAGGAAAC	0.0511188	0.0379738
AGACTAAT	0.0507285	0.0660415
AACAGAAT	0.0507285	0.0594373
AGGGGAAG	0.0507285	0.0569608
AGGAGAAG	0.0507285	0.0437525
ACGGTAAA	0.0507285	0.0503566
ATCTTAAG	0.0503383	0.0437525
ATCTAAAG	0.0503383	0.0478801
ATACTAAA	0.0499481	0.0594373
AGAGTAAT	0.0499481	0.0536587
ATCCTAAT	0.0499481	0.0693435
AGTTAAAC	0.0499481	0.0553097
AGCCAAAA	0.0499481	0.0305442
ATAATAAC	0.0495579	0.0602628
ATAACAAT	0.0495579	0.0734711
ATCCGAAT	0.0495579	0.0660415
ACGGGAAA	0.0495579	0.0586118
AGGACAAT	0.0495579	0.0421014
AGCTGAAT	0.0491677	0.0470546
AGCGAAAT	0.0491677	0.0619139
ATGGGAAC	0.0487774	0.0421014
ATGGCAAT	0.0483872	0.0577863
ATTACAAG	0.047997	0.0412759
ACAGGAAT	0.0476068	0.0701691
AAAGGAAC	0.0476068	0.0371483
ACTATAAT	0.0472166	0.0387994
ACAGAAAT	0.0472166	0.0503566
ACTGAAAT	0.0472166	0.0495311
ACAGAAAA	0.0472166	0.0321952
ATCTGAAA	0.0472166	0.0544842
AGTCGAAT	0.0468263	0.0610884
AGAAAAAG	0.0468263	0.0421014
ACTAAAAA	0.0468263	0.0387994
AAGGTAAG	0.0468263	0.0544842
AAAAGAAC	0.0468263	0.0338463
ACTTAAAA	0.0464361	0.0520077
ACTGTAAT	0.0464361	0.0503566
ATTCGAAG	0.0464361	0.0404504
AGTAGAAA	0.0464361	0.0520077
ATGCCAAA	0.0464361	0.0437525
AAGCCAAA	0.0464361	0.0255911
ACGCTAAT	0.0460459	0.0610884
AATGTAAC	0.0460459	0.0544842
AACTTAAA	0.0460459	0.0379738
ATGTGAAG	0.0460459	0.042927
AAGATAAG	0.0460459	0.042927
AGTTCAAT	0.0460459	0.0421014
AATGCAAC	0.0460459	0.0412759
ACTCAAAA	0.0460459	0.0363228
ACGAAAAG	0.0460459	0.0412759
AGGGCAAT	0.0456557	0.0610884
AAAGCAAG	0.0456557	0.0421014
ATATCAAG	0.0452655	0.0478801
ATGACAAT	0.0452655	0.0470546
ACAATAAA	0.0452655	0.0396249
AGGACAAA	0.0452655	0.0371483
AAGCTAAA	0.0452655	0.0346718
AGCTTAAT	0.0448752	0.0577863
AATGGAAC	0.0448752	0.0528332
ATAGCAAT	0.044485	0.0487056
AACTCAAA	0.044485	0.0231145
ACGGCAAA	0.044485	0.0371483
AGCATAAG	0.0440948	0.0627394
ATCGAAAA	0.0440948	0.0454035
ATACTAAG	0.0440948	0.0437525
AGAGGAAG	0.0440948	0.0412759
AGGTCAAT	0.0437046	0.0635649
ACAAGAAT	0.0437046	0.0511821
ACCGAAAT	0.0437046	0.0478801
AAACCAAT	0.0437046	0.0346718
AAACGAAC	0.0437046	0.0354973
AACCAAAC	0.0437046	0.02394
AATGAAAC	0.0433144	0.0487056
AGAGCAAA	0.0433144	0.0412759
ACGTAAAC	0.0433144	0.0404504
AAAGAAAC	0.0433144	0.0371483
ACTTGAAA	0.0433144	0.0371483
ATCGGAAA	0.0429241	0.0528332
AAGCGAAA	0.0429241	0.0288931
ATCATAAA	0.0425339	0.0586118
ACCAAAAA	0.0425339	0.0255911
AATCCAAG	0.0425339	0.0371483
AGCTAAAA	0.0425339	0.0338463
AGTCCAAT	0.0421437	0.0371483
ACCTTAAT	0.0417535	0.0544842
AGACGAAT	0.0417535	0.0478801
AGCGAAAA	0.0417535	0.0330207
ACACAAAG	0.0417535	0.0305442
AGATTAAC	0.0413633	0.0495311
AGATCAAA	0.0413633	0.0354973
AGTGGAAG	0.0413633	0.0404504
AGACAAAC	0.0413633	0.0321952
AACATAAG	0.0409731	0.0396249
ATTCCAAA	0.0409731	0.0577863
ACTATAAA	0.0409731	0.0421014
ATTTCAAC	0.0409731	0.042927
AGTATAAG	0.0409731	0.0454035
ATACCAAA	0.0409731	0.0379738
ACAGTAAT	0.0405828	0.0553097
ATTGAAAC	0.0405828	0.0396249
ACTGTAAA	0.0405828	0.0387994
ACGGAAAG	0.0405828	0.0371483
ATGTCAAG	0.0405828	0.0520077
AGTGTAAG	0.0405828	0.0421014
ACATTAAC	0.0401926	0.0363228
ACTCGAAT	0.0401926	0.0503566
ATCTTAAC	0.0401926	0.0511821
AAGAGAAG	0.0401926	0.0437525
ACCGGAAT	0.0398024	0.0454035
AGTCTAAA	0.0398024	0.0503566
AGTTGAAG	0.0398024	0.0338463
ACACAAAC	0.0398024	0.0297187
ATACCAAT	0.0394122	0.0470546
ATAGCAAG	0.0394122	0.0454035
ATCACAAT	0.039022	0.0487056
ACGTTAAG	0.039022	0.0404504
ATCTCAAG	0.039022	0.0412759
AGAGTAAG	0.039022	0.0297187
AACCTAAT	0.0386317	0.0437525
AATTGAAC	0.0386317	0.0520077
AACTAAAA	0.0386317	0.0305442
AGTACAAT	0.0386317	0.046229
ATGCGAAC	0.0386317	0.0346718
ACCTAAAT	0.0386317	0.0421014
AGGCGAAA	0.0386317	0.0363228
AAGTGAAG	0.0386317	0.0454035
ACGTGAAA	0.0386317	0.0297187
ACAAGAAA	0.0386317	0.0321952
AGTTCAAA	0.0386317	0.0421014
ACACGAAA	0.0386317	0.0214635
AGCGTAAT	0.0382415	0.0610884
AAGACAAT	0.0382415	0.0404504
AATAGAAC	0.0382415	0.046229
AACTGAAA	0.0382415	0.0379738
ATCATAAG	0.0378513	0.0421014
ACACGAAT	0.0378513	0.0437525
ATCGTAAG	0.0378513	0.0387994
ATCGAAAG	0.0378513	0.0272421
AGAAGAAG	0.0378513	0.0454035
AGCTTAAG	0.0378513	0.0354973
ATCTAAAC	0.0378513	0.0495311
AGAGAAAG	0.0374611	0.0379738
AGTTTAAC	0.0374611	0.0330207
ACTGGAAA	0.0374611	0.042927
ATAGGAAC	0.0374611	0.0544842
ACAATAAG	0.0374611	0.0396249
AGTACAAA	0.0374611	0.044578
ACCTTAAA	0.0374611	0.0173359
ACGTTAAA	0.0370709	0.0421014
ATTGGAAG	0.0370709	0.0437525
ACAACAAA	0.0370709	0.0247656
ACGTCAAA	0.0370709	0.0173359
ACCATAAT	0.0366806	0.0495311
ATATCAAC	0.0366806	0.0470546
ACATCAAT	0.0366806	0.0338463
ATGTGAAC	0.0366806	0.0387994
AGTGCAAT	0.0366806	0.0396249
ACTCAAAG	0.0366806	0.0165104
AAGTCAAG	0.0366806	0.0330207
ACTGCAAT	0.0366806	0.0247656
AAGGGAAC	0.0362904	0.0305442
AGGCTAAA	0.0362904	0.0454035
ACATCAAA	0.0362904	0.02394
AACTTAAG	0.0362904	0.0363228
AGCCAAAG	0.0362904	0.0189869
ACTTCAAT	0.0362904	0.044578
ACCTGAAT	0.0359002	0.0437525
AGATAAAG	0.0359002	0.0280676
ACGGTAAG	0.0359002	0.0412759
ATCTGAAG	0.0359002	0.0412759
AGTTCAAG	0.0359002	0.0313697
AGTACAAG	0.0359002	0.0297187
ATCAGAAG	0.0359002	0.0330207
ACAGCAAA	0.0359002	0.0346718
AGATCAAT	0.03551	0.0577863
ATAACAAG	0.03551	0.046229
ATTAGAAC	0.03551	0.0354973
AACAGAAA	0.03551	0.0330207
AGGGGAAC	0.03551	0.0487056
ACGAGAAA	0.03551	0.0379738
AAGTTAAC	0.03551	0.0354973
ATGGCAAG	0.0351198	0.0371483
ATGCTAAC	0.0347295	0.0495311
AACATAAC	0.0347295	0.0330207
ACGAGAAT	0.0347295	0.0553097
AGCGTAAA	0.0347295	0.0396249
AATCGAAC	0.0347295	0.0511821
AGGGTAAC	0.0343393	0.0321952
AGACGAAA	0.0343393	0.0264166
ATCCCAAA	0.0343393	0.0297187
AGTCTAAG	0.0343393	0.0297187
ATCCAAAC	0.0343393	0.0264166
AGGTGAAG	0.0339491	0.0470546
ATAGAAAC	0.0339491	0.0354973
AATACAAC	0.0335589	0.0544842
AGTAGAAG	0.0335589	0.0297187
ATGACAAG	0.0335589	0.0288931
ACGCGAAT	0.0335589	0.0371483
AGCAGAAA	0.0335589	0.0280676
ATTGTAAC	0.0335589	0.0371483
ACGGCAAT	0.0335589	0.0288931
AACGTAAG	0.0335589	0.0305442
ATTGCAAG	0.0335589	0.0363228
ACTTCAAA	0.0335589	0.0255911
ACCGTAAT	0.0331687	0.0495311
ATAAGAAC	0.0331687	0.0437525
AGAGCAAT	0.0331687	0.0363228
ACAGGAAG	0.0331687	0.0396249
ATGATAAC	0.0331687	0.0478801
ACTTTAAG	0.0331687	0.0321952
AGGGCAAG	0.0331687	0.0363228
ACTAAAAG	0.0331687	0.0297187
AGTCCAAA	0.0331687	0.0280676
AGCGAAAG	0.0331687	0.02394
AGAGAAAC	0.0331687	0.0231145
ATTCTAAC	0.0327784	0.0321952
ATCGCAAT	0.0327784	0.0346718
ACTTAAAG	0.0327784	0.046229
AAGGCAAG	0.0327784	0.0255911
ACTGAAAA	0.0327784	0.0363228
AACGAAAG	0.0327784	0.0264166
ATCACAAG	0.0327784	0.044578
AGCCTAAT	0.0323882	0.0379738
AGTCGAAA	0.0323882	0.0321952
AACCGAAT	0.0323882	0.0487056
AGCGGAAA	0.0323882	0.0330207
ACGATAAA	0.0323882	0.0487056
ATTCGAAC	0.0323882	0.0396249
AGGTTAAC	0.0323882	0.0338463
AGTGAAAC	0.0323882	0.020638
AGCGCAAA	0.0323882	0.0214635
ATTCCAAG	0.031998	0.044578
ATACGAAC	0.031998	0.0346718
ACAGTAAG	0.031998	0.0272421
AGAACAAA	0.031998	0.0330207
ACCAAAAC	0.031998	0.020638
ACACTAAT	0.0316078	0.0437525
ACTCTAAT	0.0316078	0.0404504
ATGGTAAC	0.0316078	0.042927
AGGCCAAT	0.0316078	0.0412759
AGATGAAG	0.0316078	0.0297187
AATCTAAC	0.0316078	0.0272421
ATCGAAAC	0.0316078	0.0214635
AGAATAAC	0.0312176	0.0487056
AGGCTAAG	0.0312176	0.044578
ATCCTAAG	0.0312176	0.0404504
AGGCCAAG	0.0312176	0.0264166
ATCCGAAA	0.0308273	0.0338463
AAGTCAAC	0.0308273	0.0272421
AGCAGAAG	0.0308273	0.0264166
ACCATAAA	0.0304371	0.0264166
ATACTAAC	0.0304371	0.0396249
ACTTTAAC	0.0304371	0.0354973
ATTGGAAC	0.0304371	0.0387994
ATCCGAAG	0.0304371	0.0338463
ACATGAAC	0.0304371	0.0189869
ATGAGAAC	0.0300469	0.0387994
ATATGAAC	0.0300469	0.0528332
ACATGAAG	0.0300469	0.0354973
ACTATAAG	0.0300469	0.0313697
AGACTAAG	0.0300469	0.0313697
AAACTAAC	0.0300469	0.0288931
ACTAGAAG	0.0300469	0.0231145
ACTCAAAC	0.0300469	0.0148593
AGACTAAA	0.0296567	0.0288931
AGGACAAG	0.0296567	0.0288931
ATGGCAAC	0.0296567	0.0264166
AGAACAAT	0.0292665	0.0379738
AACACAAT	0.0292665	0.0421014
ACCAGAAT	0.0292665	0.0363228
ACTCGAAA	0.0292665	0.0313697
AGGATAAC	0.0292665	0.0354973
AACTAAAG	0.0292665	0.0354973
AAACCAAG	0.0292665	0.0198124
AACTCAAT	0.0288762	0.0313697
AGCTAAAG	0.0288762	0.0255911
ACGAAAAC	0.0288762	0.0264166
AACTAAAC	0.0288762	0.0264166
ACGGAAAC	0.0288762	0.0305442
ACTACAAT	0.028486	0.0338463
AAGAGAAC	0.028486	0.0288931
ACTCTAAA	0.028486	0.0247656
ATCCTAAA	0.028486	0.0421014
AAGATAAC	0.028486	0.0387994
ACTACAAA	0.028486	0.0255911
AGCCGAAT	0.0280958	0.0330207
ACGCTAAA	0.0280958	0.0321952
ACAGAAAG	0.0280958	0.02394
ACAGCAAT	0.0280958	0.0214635
AGTGGAAC	0.0280958	0.0313697
AAAGCAAC	0.0280958	0.0272421
ACTTAAAC	0.0277056	0.0354973
AGGTCAAG	0.0277056	0.0288931
ATGACAAC	0.0277056	0.0354973
ACTCCAAA	0.0277056	0.0148593
AGCACAAA	0.0277056	0.0330207
AACCCAAA	0.0277056	0.020638
ACCCTAAT	0.0273154	0.022289
ACAAGAAG	0.0273154	0.0321952
AGATCAAG	0.0273154	0.0272421
ACACTAAA	0.0273154	0.0173359
AACAGAAG	0.0273154	0.0297187
ACCAAAAG	0.0273154	0.0189869
ATGTCAAC	0.0273154	0.0214635
AACCCAAT	0.0273154	0.022289
ACTTGAAG	0.0273154	0.02394
ACTGAAAG	0.0273154	0.0231145
ACGTCAAT	0.0269251	0.0321952
ATTCCAAC	0.0269251	0.022289
ACAGAAAC	0.0269251	0.0231145
ACGAGAAG	0.0269251	0.0346718
AGGTCAAC	0.0269251	0.0288931
AACCGAAA	0.0265349	0.0255911
ACCGGAAA	0.0265349	0.0280676
ACATCAAG	0.0265349	0.0330207
ACTGTAAG	0.0265349	0.0264166
AGCTAAAC	0.0265349	0.0255911
AGCTCAAT	0.0261447	0.022289
ACTAGAAA	0.0261447	0.0305442
AAGCCAAT	0.0261447	0.0272421
AGGAGAAC	0.0261447	0.0148593
AGACCAAT	0.0261447	0.0330207
AGCTGAAA	0.0261447	0.02394
AAGACAAG	0.0261447	0.0280676
AGTCCAAG	0.0261447	0.0214635
AGCCAAAC	0.0261447	0.0181614
AGCTTAAA	0.0257545	0.0421014
ATTACAAC	0.0257545	0.022289
AGCGCAAT	0.0257545	0.0297187
ATCTGAAC	0.0257545	0.042927
ACGTGAAG	0.0257545	0.0305442
AGTTGAAC	0.0257545	0.0338463
AGCACAAT	0.0257545	0.0264166
ACTCTAAG	0.0257545	0.020638
ACGGGAAG	0.0253643	0.0346718
ACCAGAAA	0.0253643	0.0156849
ATCTCAAC	0.0253643	0.0264166
AAGTGAAC	0.0253643	0.0387994
ACCTAAAA	0.0253643	0.0156849
ATCCCAAT	0.0249741	0.0330207
ATGCCAAG	0.0249741	0.0247656
ACGACAAT	0.0249741	0.0297187
ATGCCAAC	0.0249741	0.0123828
ACCTCAAT	0.0249741	0.0288931
AGCTGAAG	0.0249741	0.022289
AACGGAAC	0.0249741	0.020638
AGTTCAAC	0.0245838	0.0173359
ACCCAAAA	0.0245838	0.020638
AGACCAAA	0.0245838	0.02394
ATCCCAAG	0.0245838	0.0198124
AACGCAAT	0.0241936	0.0313697
ACTCCAAT	0.0241936	0.0231145
AGGCCAAA	0.0241936	0.0280676
AGTAGAAC	0.0241936	0.02394
AGCTCAAA	0.0241936	0.0264166
ATACCAAC	0.0241936	0.0214635
AGGCGAAG	0.0241936	0.0297187
AACCTAAA	0.0241936	0.0264166
ACGCTAAG	0.0241936	0.0231145
ACCATAAG	0.0238034	0.0247656
AAGCGAAG	0.0238034	0.0231145
ATACCAAG	0.0238034	0.0305442
ATCGTAAC	0.0238034	0.0321952
AACGAAAC	0.0238034	0.0156849
ATCCGAAC	0.0238034	0.0198124
ATCAGAAC	0.0238034	0.0371483
AGCCGAAA	0.0238034	0.0198124
AGTGCAAG	0.0238034	0.0264166
ACTGAAAC	0.0238034	0.0173359
AAGGTAAC	0.0234132	0.0321952
AACTTAAC	0.0234132	0.0247656
ACGTTAAC	0.0234132	0.0288931
AGAGGAAC	0.0234132	0.0264166
AGTGTAAC	0.0234132	0.0272421
AGAGTAAC	0.0234132	0.0264166
ATCATAAC	0.023023	0.0321952
AGTCGAAG	0.023023	0.0346718
ATAGTAAC	0.023023	0.0379738
ACAACAAT	0.023023	0.0305442
ACTAAAAC	0.023023	0.0297187
ATCGCAAG	0.023023	0.020638
ATCGGAAC	0.023023	0.0231145
ATCCTAAC	0.023023	0.0354973
ACTATAAC	0.023023	0.02394
AGTATAAC	0.0226327	0.0247656
ACCGAAAA	0.0226327	0.0165104
ACCGTAAA	0.0226327	0.0173359
ACACTAAG	0.0226327	0.0288931
AGCCCAAT	0.0226327	0.0231145
ATAACAAC	0.0222425	0.0346718
ACAGGAAC	0.0222425	0.02394
ACGACAAA	0.0222425	0.0255911
AGGTGAAC	0.0222425	0.0264166
ATCACAAC	0.0222425	0.0165104
AACGCAAG	0.0222425	0.0280676
ACCCGAAT	0.0218523	0.0247656
AGAACAAG	0.0218523	0.0231145
AACACAAG	0.0218523	0.020638
AGCCTAAG	0.0218523	0.0148593
ACCTAAAG	0.0218523	0.022289
ACGATAAG	0.0214621	0.0313697
AACTGAAG	0.0214621	0.0338463
ACGGGAAC	0.0214621	0.0231145
AGCGTAAG	0.0214621	0.0338463
AGCGGAAG	0.0214621	0.0173359
ACCTGAAA	0.0214621	0.0189869
ACGACAAG	0.0214621	0.0231145
ACGTGAAC	0.0214621	0.020638
ACAATAAC	0.0210719	0.0247656
ACTGGAAG	0.0210719	0.0313697
ACGGCAAG	0.0210719	0.02394
ACGCGAAA	0.0210719	0.0313697
AACGTAAC	0.0210719	0.0272421
AGCAGAAC	0.0210719	0.0140338
AGATCAAC	0.0210719	0.0338463
ACATCAAC	0.0210719	0.0280676
ACCTAAAC	0.0210719	0.022289
AGCATAAC	0.0206816	0.0379738
AGATGAAC	0.0206816	0.0255911
ATAGCAAC	0.0206816	0.0404504
AGGCGAAC	0.0206816	0.0305442
AGACGAAG	0.0202914	0.0272421
ACCCAAAG	0.0202914	0.020638
ACGTCAAG	0.0202914	0.0198124
ACTGTAAC	0.0202914	0.0165104
AGTCGAAC	0.0199012	0.02394
AGTCTAAC	0.0199012	0.0231145
AAACCAAC	0.0199012	0.0214635
ACCACAAT	0.0199012	0.0214635
ACCGCAAT	0.0199012	0.0264166
ACTGCAAC	0.0199012	0.00825518
ATTGCAAC	0.019511	0.0272421
AGCTTAAC	0.019511	0.0165104
ACCGTAAG	0.019511	0.0280676
ACTCCAAG	0.019511	0.0123828
AAGGCAAC	0.019511	0.0264166
AGCCGAAG	0.019511	0.0181614
AAGACAAC	0.019511	0.0156849
ACGCCAAT	0.019511	0.0255911
AGCCTAAA	0.0191208	0.020638
ACGATAAC	0.0191208	0.0264166
AGAGCAAG	0.0191208	0.0132083
ACCTCAAA	0.0191208	0.0255911
AAGCTAAC	0.0191208	0.0214635
AGGCTAAC	0.0191208	0.022289
AAGCTAAG	0.0187305	0.0272421
ACAACAAG	0.0187305	0.0140338
AGGACAAC	0.0187305	0.020638
ACCTTAAG	0.0187305	0.0280676
AGCTCAAG	0.0187305	0.020638
ACGTCAAC	0.0187305	0.0165104
ACTCTAAC	0.0187305	0.0181614
ACTACAAG	0.0183403	0.0231145
ACTGGAAC	0.0183403	0.020638
AGCACAAG	0.0183403	0.0123828
AACCTAAG	0.0179501	0.0173359
ACTTGAAC	0.0179501	0.0313697
AACAGAAC	0.0179501	0.0231145
ACCGCAAA	0.0179501	0.0123828
ACCAGAAG	0.0179501	0.0214635
ACCGTAAC	0.0179501	0.0272421
AAGCGAAC	0.0175599	0.0231145
ACACGAAG	0.0175599	0.0156849
AGAAGAAC	0.0175599	0.0255911
AGCTGAAC	0.0175599	0.0189869
ACCGCAAG	0.0175599	0.00990622
AGGGCAAC	0.0171697	0.0173359
AACTCAAC	0.0171697	0.0181614
ACCCCAAT	0.0171697	0.0189869
ATCCCAAC	0.0171697	0.0140338
AAGCCAAG	0.0167794	0.0189869
ACTTCAAG	0.0167794	0.0255911
ACTCGAAG	0.0167794	0.0181614
ACACCAAT	0.0167794	0.0189869
AACTGAAC	0.0167794	0.0181614
AACCGAAG	0.0167794	0.0140338
ACCCGAAA	0.0167794	0.0140338
ACGCGAAG	0.0167794	0.02394
AACTCAAG	0.0163892	0.0288931
AACGGAAG	0.0163892	0.020638
ACAGCAAG	0.0163892	0.0140338
ACCTGAAG	0.0163892	0.020638
ACCGAAAG	0.0163892	0.0148593
AGACCAAG	0.0163892	0.0140338
ACTACAAC	0.0163892	0.0173359
ACCCAAAC	0.0163892	0.0107317
AATCCAAC	0.015999	0.022289
ACGCCAAA	0.015999	0.022289
AGCCGAAC	0.015999	0.0140338
ACTGCAAG	0.015999	0.0107317
ACGAGAAC	0.0156088	0.0165104
AGCCCAAA	0.0156088	0.0156849
AGACTAAC	0.0156088	0.0198124
ACCTCAAG	0.0156088	0.00825518
AGTACAAC	0.0152186	0.0412759
ACGGCAAC	0.0152186	0.0123828
ACCTTAAC	0.0152186	0.0148593
ACAGTAAC	0.0148283	0.0148593
ACAAGAAC	0.0144381	0.0297187
AGCGTAAC	0.0144381	0.0148593
ACGGTAAC	0.0144381	0.02394
ACTAGAAC	0.0144381	0.0148593
AGCGCAAG	0.0144381	0.0165104
AGTCCAAC	0.0144381	0.0247656
AACCCAAG	0.0144381	0.00825518
ACCATAAC	0.0140479	0.0198124
AACACAAC	0.0140479	0.0272421
ACAGCAAC	0.0140479	0.00990622
ACCACAAA	0.0140479	0.0198124
ATCGCAAC	0.0140479	0.02394
AGACGAAC	0.0136577	0.0181614
AGCGAAAC	0.0136577	0.0198124
ACCCTAAA	0.0136577	0.0107317
AGAGCAAC	0.0136577	0.020638
ACAACAAC	0.0132675	0.0123828
ACCGGAAC	0.0132675	0.0123828
ACGACAAC	0.0132675	0.0148593
ACCCTAAG	0.0132675	0.0107317
ACGCTAAC	0.0132675	0.0156849
AGCGGAAC	0.0128772	0.0156849
ACCAGAAC	0.0128772	0.022289
ACCCGAAG	0.0128772	0.0132083
AGCCCAAG	0.0128772	0.0123828
ACACCAAG	0.0128772	0.0123828
ACCTCAAC	0.0128772	0.0107317
AGAACAAC	0.012487	0.02394
ACCGAAAC	0.012487	0.00825518
AGCGCAAC	0.012487	0.0107317
ACACCAAA	0.0120968	0.0148593
ACTTCAAC	0.0120968	0.0231145
ACACGAAC	0.0120968	0.0123828
ACGCCAAC	0.0120968	0.0090807
ACACTAAC	0.0117066	0.0140338
AACCGAAC	0.0117066	0.0198124
ACCTGAAC	0.0113164	0.0214635
ACTCGAAC	0.0113164	0.0198124
ACTCCAAC	0.0113164	0.0198124
AGTGCAAC	0.0113164	0.0214635
ACCACAAG	0.0113164	0.00825518
AGGCCAAC	0.0113164	0.0156849
AACCCAAC	0.0113164	0.0181614
ACACCAAC	0.0113164	0.0107317
ACCCCAAA	0.0109261	0.0123828
AGCCTAAC	0.0109261	0.0156849
AAGCCAAC	0.0109261	0.0107317
ACGCGAAC	0.0109261	0.0165104
ACCCCAAG	0.0105359	0.00990622
AGCCCAAC	0.0105359	0.0123828
AGCTCAAC	0.0101457	0.0231145
AACCTAAC	0.00975549	0.0132083
ACGCCAAG	0.00936527	0.0140338
ACCACAAC	0.00936527	0.0090807
AGACCAAC	0.00936527	0.00742967
AGCACAAC	0.00897505	0.0123828
ACCCGAAC	0.00897505	0.0132083
ACCGGAAG	0.00897505	0.0123828
AACGCAAC	0.00858483	0.0181614
ACCGCAAC	0.00819461	0.0156849
ACCCTAAC	0.00819461	0.0156849
ACCCCAAC	0.00546307	0.00412759
	100	100

## Sheet: Table S2c. Sorted by POU1
	Relative frequency		Ratio
sequense	POU1	POU1+BOB1	(POU1+BOB1)/POU1	N of sequence
ATGCAAAT	5.3186	8.18446	1.53884	1
ATGTAAAT	3.45026	2.30073	0.666829	2
ATTTAAAT	2.82672	0.708639	0.250693	3
ATGCTAAT	1.85346	0.24857	0.134111	4
ATTTGAAT	1.84355	1.92378	1.04352	5
ATTCAAAT	1.57582	1.57141	0.997201	6
ATGCAAAA	1.49802	3.15297	2.10475	7
ATGTTAAT	1.38552	0.207597	0.149833	8
AATGCAAA	1.36378	2.57662	1.88932	9
ATGGTAAT	1.26615	0.201744	0.159336	10
ATGCAAAG	1.06288	2.21723	2.08606	11
ATGGAAAT	0.942749	0.958379	1.01658	12
ATTATAAT	0.940079	0.163112	0.173509	13
AATTTAAA	0.913383	0.30281	0.331526	14
AGGCAAAT	0.769988	2.22347	2.88767	15
ATGTAAAA	0.713545	0.630595	0.883749	16
ATTTTAAT	0.672357	0.257935	0.383628	17
AATGTAAA	0.614007	0.547088	0.891012	18
ATTAAAAT	0.614007	0.227888	0.371149	19
AGTCAAAT	0.565954	1.18197	2.08846	20
ACGCAAAT	0.564047	1.27407	2.25879	21
AGGGAAAT	0.549174	0.962672	1.75294	22
ATGCAAAC	0.543072	1.34665	2.47969	23
ATGATAAT	0.512944	0.137747	0.268543	24
ATTAGAAT	0.500358	0.133455	0.266719	25
ATGTAAAG	0.489299	0.488555	0.99848	26
ATTCTAAT	0.448111	0.120188	0.26821	27
ATATTAAT	0.423703	0.14243	0.336156	28		POU1	POU1+BOB1
AAATTAAT	0.41455	0.243887	0.588318	29	20	29.0109	29.787
AGGTAAAT	0.378701	0.55021	1.45289	30	50	41.4634	41.8776
AAGCAAAT	0.37832	0.90648	2.39607	31	100	51.6475	50.4753
ATGAAAAT	0.372981	0.619278	1.66035	32
AATTCAAA	0.372981	0.438217	1.1749	33
ATTCAAAA	0.364972	0.4269	1.16968	34
AATTAAAA	0.364209	0.156478	0.429638	35
AAACAAAT	0.351624	0.760538	2.16293	36
AAATTAAC	0.334081	0.188476	0.564163	37
AATTAAAT	0.333318	0.189647	0.568966	38
AAATTAAA	0.32836	0.21345	0.650048	39
ATACAAAT	0.317682	0.526016	1.65579	40
ATTGTAAT	0.312343	0.115895	0.371051	41
AATTTAAT	0.306241	0.182233	0.595063	42
ATTTAAAA	0.30319	0.17794	0.586893	43
AAATTAAG	0.302808	0.238424	0.787376	44
ATATTAAA	0.297088	0.130724	0.440016	45
AATCAAAT	0.295181	0.419486	1.42111	46
AGGAAAAT	0.286791	0.507285	1.76883	47
ATTCAAAG	0.280689	0.313737	1.11774	48
ATGCTAAA	0.273061	0.0690689	0.252943	49
ATAATAAT	0.27268	0.110432	0.404988	50
AGCATAAT	0.268866	0.0757026	0.281562	51
AAATAAAT	0.261239	0.232181	0.888767	52
ATTGAAAT	0.257425	0.189256	0.73519	53
AAATGAAT	0.2559	0.181062	0.70755	54
ATGTAAAC	0.248654	0.293445	1.18014	55
ATATGAAT	0.242933	0.121748	0.50116	56
AATGGAAA	0.241789	0.267691	1.10712	57
ATTTCAAT	0.237975	0.174428	0.732967	58
AGGCAAAA	0.236069	0.453825	1.92243	59
ATGGAAAA	0.232636	0.289153	1.24294	60
ACATAAAT	0.229967	0.116676	0.507359	61
AGTAAAAT	0.225772	0.236473	1.0474	62
AAGGCAAA	0.221958	0.442509	1.99366	63
AGTTAAAT	0.218907	0.216572	0.989333	64
ACGTAAAT	0.217381	0.23179	1.06628	65
AATAAAAT	0.21433	0.184964	0.862986	66
AATATAAT	0.213186	0.137357	0.644306	67
ATGTTAAA	0.212424	0.0956038	0.450062	68
AGGGAAAA	0.204796	0.279787	1.36618	69
AGCATAAA	0.204415	0.0565818	0.276799	70
AGAATAAT	0.203271	0.0948233	0.466488	71
AATTGAAT	0.202508	0.127212	0.628181	72
ATTGCAAA	0.202127	0.322321	1.59465	73
ATCTGAAT	0.201364	0.101847	0.505788	74
AAGGAAAT	0.199457	0.287592	1.44187	75
ATTTTAAA	0.198313	0.126431	0.637534	76
ATATTAAG	0.196025	0.0881896	0.449891	77
AAGGGAAA	0.195643	0.254813	1.30244	78
ATTACAAT	0.19488	0.0846776	0.434511	79
AGGGAAAG	0.194499	0.222035	1.14157	80
ATAATAAA	0.193736	0.117456	0.606268	81
AGTATAAT	0.19183	0.0866287	0.451592	82
AAGTAAAT	0.189923	0.227108	1.19579	83
AATTAAAG	0.186872	0.112383	0.601392	84
AGGGTAAT	0.18649	0.119797	0.642379	85
ATTTAAAG	0.183439	0.151795	0.827496	86
ATAATAAG	0.182295	0.0940429	0.515882	87
ATGGTAAA	0.181533	0.105359	0.580388	88
AAAATAAT	0.177719	0.152576	0.858524	89
AAATAAAA	0.177337	0.198622	1.12002	90
AGGTTAAT	0.173524	0.0920918	0.530716	91
ATCTAAAT	0.17238	0.122919	0.713073	92
ATTAAAAA	0.171998	0.114334	0.664741	93
AAATGAAG	0.170473	0.185744	1.08958	94
AATTTAAC	0.170473	0.117066	0.686713	95
ATACTAAT	0.170473	0.0745319	0.437207	96
AATGTAAT	0.169329	0.108871	0.642958	97
AGGATAAT	0.168185	0.0952136	0.566126	98
AACCAAAT	0.166278	0.256764	1.54419	99
ACATTAAT	0.165134	0.0776537	0.470248	100

## Sheet: Table S2d. Sorted by POU2
	Relative frequency		Ratio
sequense	POU2	POU2+BOB1	POU2+BOB1/POU2	N of sequence
ATGCAAAT	5.4111	12.6271	2.33356	1
ATGTAAAT	2.8914	3.57284	1.23568	2
ATTTAAAT	2.37642	0.832123	0.350158	3
ATGCTAAT	1.82345	0.283153	0.155284	4
ATTTGAAT	1.50065	2.3164	1.5436	5
ATGTTAAT	1.31135	0.240226	0.18319	6
ATTCAAAT	1.29293	1.94987	1.5081	7
ATGGTAAT	1.27797	0.218762	0.171179	8
ATGCAAAA	1.1721	3.29217	2.80878	9
AATGCAAA	1.1042	3.20962	2.90673	10
ATTATAAT	1.03515	0.207205	0.200169	11
ATGCAAAG	0.830883	2.27183	2.73423	12
AATTTAAA	0.792906	0.312046	0.393547	13
ATGGAAAT	0.722707	0.981541	1.35815	14
ATTTTAAT	0.678976	0.221239	0.325842	15
ATTAAAAT	0.635821	0.203903	0.320692	16
ATTAGAAT	0.609928	0.179963	0.295056	17
ATGATAAT	0.582309	0.135385	0.232497	18
ATATTAAT	0.558142	0.177486	0.317995	19
AGGCAAAT	0.546058	2.14552	3.92911	20
ATTCTAAT	0.531673	0.151895	0.285693	21
AATGTAAA	0.508657	0.552272	1.08575	22
ATGTAAAA	0.495998	0.618313	1.2466	23
AAATTAAT	0.477585	0.28728	0.601527	24
ATGCAAAC	0.444787	1.268	2.85079	25
ACGCAAAT	0.408537	1.37696	3.37048	26
AATTAAAA	0.39933	0.15107	0.378308	27
ATGTAAAG	0.393001	0.47715	1.21412	28		POU2	POU2+BOB1
AATTAAAT	0.389548	0.173359	0.445025	29	20	27.1545	35.3784
AGTCAAAT	0.367108	1.04346	2.84237	30	50	37.8696	45.8088
ATATTAAA	0.365381	0.139513	0.381827	31	100	48.674	54.3819
AGGGAAAT	0.364806	0.713248	1.95514	32
ATTGTAAT	0.357326	0.137036	0.383505	33
ATAATAAT	0.353298	0.142815	0.404233	34
AAATTAAA	0.348695	0.217111	0.62264	35
AAATTAAG	0.34179	0.319476	0.934714	36
AATTTAAT	0.333159	0.161802	0.485659	37
AAATTAAC	0.330282	0.195648	0.592367	38
ATATGAAT	0.315897	0.141164	0.446867	39
ATGAAAAT	0.304389	0.518426	1.70317	40
AGAATAAT	0.300361	0.122177	0.406767	41
ATTTAAAA	0.298635	0.137036	0.458875	42
ATGCTAAA	0.293456	0.0817263	0.278496	43
AATTCAAA	0.292305	0.400376	1.36972	44
ATTGAAAT	0.290004	0.137036	0.472532	45
AGTATAAT	0.289428	0.120526	0.416427	46
AATATAAT	0.285976	0.132908	0.464754	47
AGGGTAAT	0.279071	0.128781	0.461463	48
ATTCAAAA	0.277345	0.2782	1.00308	49
AGCATAAT	0.277345	0.105666	0.380993	50
AAATAAAT	0.275043	0.220413	0.801378	51
AAATGAAT	0.273317	0.238575	0.872888	52
AAGCAAAT	0.27044	0.826344	3.05556	53
AGGTAAAT	0.268714	0.391296	1.45618	54
ATACAAAT	0.268714	0.497788	1.85248	55
ATTTCAAT	0.267563	0.141989	0.530676	56
AAACAAAT	0.265837	0.669495	2.51845	57
ATTACAAT	0.260083	0.0965857	0.371365	58
ATAATAAG	0.258356	0.126304	0.488876	59
ATAATAAA	0.251451	0.0998877	0.397245	60
ACATAAAT	0.250876	0.176661	0.704176	61
AATTGAAT	0.237642	0.124653	0.524543	62
ATCTGAAT	0.231888	0.126304	0.544679	63
ATCTAAAT	0.226709	0.123002	0.542555	64
ATATAAAT	0.22153	0.115573	0.521701	65
AATTAAAG	0.22038	0.120526	0.5469	66
ATTAAAAA	0.219229	0.0899815	0.410446	67
ATGTTAAA	0.215776	0.089156	0.413187	68
AGGTTAAT	0.215776	0.108143	0.50118	69
ACATTAAT	0.214626	0.101539	0.473097	70
AATAAAAT	0.21405	0.164278	0.767475	71
ATATTAAG	0.21405	0.117224	0.547645	72
AGTTAAAT	0.213475	0.12713	0.595526	73
AGCATAAA	0.212899	0.0866794	0.407138	74
AATCAAAT	0.212324	0.301314	1.41912	75
AAAATAAT	0.212324	0.155197	0.730946	76
AATGGAAT	0.212324	0.146942	0.692066	77
AGGATAAT	0.208872	0.105666	0.505892	78
AGATTAAT	0.20657	0.106492	0.515525	79
ATTTTAAA	0.204268	0.10319	0.505168	80
ATTATAAA	0.203693	0.0800753	0.393118	81
AAGATAAT	0.202542	0.128781	0.635823	82
ATTCAAAG	0.201391	0.241877	1.20103	83
AGGAAAAT	0.200241	0.346718	1.73151	84
AGGCTAAT	0.196788	0.090807	0.461446	85
ATGTAAAC	0.195637	0.227018	1.1604	86
AATTAAAC	0.193911	0.0965857	0.498093	87
AAAAAAAA	0.19276	0.129606	0.672371	88
ATGGTAAA	0.191034	0.106492	0.55745	89
ATATTAAC	0.189308	0.0751222	0.396825	90
AAATGAAG	0.188157	0.199775	1.06175	91
ATTTAAAG	0.18528	0.0759477	0.409908	92
AGAATAAA	0.181828	0.089156	0.490333	93
ATACTAAT	0.181828	0.109794	0.603835	94
AATGTAAT	0.181252	0.137036	0.756052	95
ATTGGAAT	0.179526	0.0965857	0.538004	96
AGTAAAAT	0.178951	0.147768	0.825746	97
ACATGAAT	0.178951	0.0924581	0.516668	98
AAGTTAAT	0.178375	0.102364	0.573871	99
AATATAAA	0.1778	0.100713	0.566442	100

## Sheet: Table S3a. Sorted by POU1+Bob1
	Relative frequency		Ratio
sequense	POU1	POU1+BOB1	(POU1+BOB1)/POU1	N of sequence
ATGCAAAT	5.3186	8.18446	1.53884	1
ATGCAAAA	1.49802	3.15297	2.10475	2																Relative frequency		Ratio
AATGCAAA	1.36378	2.57662	1.88932	3															sequense	POU1	POU1+BOB1	(POU1+BOB1)/POU1
ATGTAAAT	3.45026	2.30073	0.666829	4															AGGCAAAT	0.769988	2.22347	2.88767
AGGCAAAT	0.769988	2.22347	2.88767	5															ATGCAAAC	0.543072	1.34665	2.47969
ATGCAAAG	1.06288	2.21723	2.08606	6															AAGCAAAT	0.37832	0.90648	2.39607
ATTTGAAT	1.84355	1.92378	1.04352	7															ACGCAAAT	0.564047	1.27407	2.25879
ATTCAAAT	1.57582	1.57141	0.997201	8															AAACAAAT	0.351624	0.760538	2.16293
ATGCAAAC	0.543072	1.34665	2.47969	9															ATGCAAAA	1.49802	3.15297	2.10475
ACGCAAAT	0.564047	1.27407	2.25879	10															AGTCAAAT	0.565954	1.18197	2.08846
AGTCAAAT	0.565954	1.18197	2.08846	11															ATGCAAAG	1.06288	2.21723	2.08606
AGGGAAAT	0.549174	0.962672	1.75294	12															AAGGCAAA	0.221958	0.442509	1.99366
ATGGAAAT	0.942749	0.958379	1.01658	13															AGGCAAAA	0.236069	0.453825	1.92243
AAGCAAAT	0.37832	0.90648	2.39607	14															AATGCAAA	1.36378	2.57662	1.88932
AAACAAAT	0.351624	0.760538	2.16293	15															AGGAAAAT	0.286791	0.507285	1.76883
ATTTAAAT	2.82672	0.708639	0.250693	16															AGGGAAAT	0.549174	0.962672	1.75294
ATGTAAAA	0.713545	0.630595	0.883749	17															ATGAAAAT	0.372981	0.619278	1.66035
ATGAAAAT	0.372981	0.619278	1.66035	18															ATACAAAT	0.317682	0.526016	1.65579
AGGTAAAT	0.378701	0.55021	1.45289	19															ATTGCAAA	0.202127	0.322321	1.59465
AATGTAAA	0.614007	0.547088	0.891012	20															AACCAAAT	0.166278	0.256764	1.54419
ATACAAAT	0.317682	0.526016	1.65579	21															ATGCAAAT	5.3186	8.18446	1.53884
AGGAAAAT	0.286791	0.507285	1.76883	22															AGGTAAAT	0.378701	0.55021	1.45289
ATGTAAAG	0.489299	0.488555	0.99848	23															AAGGAAAT	0.199457	0.287592	1.44187
AGGCAAAA	0.236069	0.453825	1.92243	24															AATCAAAT	0.295181	0.419486	1.42111
AAGGCAAA	0.221958	0.442509	1.99366	25															AGGGAAAA	0.204796	0.279787	1.36618
AATTCAAA	0.372981	0.438217	1.1749	26															AAGGGAAA	0.195643	0.254813	1.30244
ATTCAAAA	0.364972	0.4269	1.16968	27															ATGGAAAA	0.232636	0.289153	1.24294
AATCAAAT	0.295181	0.419486	1.42111	28		POU1	POU1+BOB1												AAGTAAAT	0.189923	0.227108	1.19579
ATTGCAAA	0.202127	0.322321	1.59465	29	20	24.6911	34.5973												ATGTAAAC	0.248654	0.293445	1.18014
ATTCAAAG	0.280689	0.313737	1.11774	30	50	36.6474	43.9645												AATTCAAA	0.372981	0.438217	1.1749
AATTTAAA	0.913383	0.30281	0.331526	31	100	51.6475	50.4753												ATTCAAAA	0.364972	0.4269	1.16968
ATGTAAAC	0.248654	0.293445	1.18014	32															AGGGAAAG	0.194499	0.222035	1.14157
ATGGAAAA	0.232636	0.289153	1.24294	33															AAATAAAA	0.177337	0.198622	1.12002
AAGGAAAT	0.199457	0.287592	1.44187	34															ATTCAAAG	0.280689	0.313737	1.11774
AGGGAAAA	0.204796	0.279787	1.36618	35															AATGGAAA	0.241789	0.267691	1.10712
AATGGAAA	0.241789	0.267691	1.10712	36															AAATGAAG	0.170473	0.185744	1.08958
ATTTTAAT	0.672357	0.257935	0.383628	37															ACGTAAAT	0.217381	0.23179	1.06628
AACCAAAT	0.166278	0.256764	1.54419	38															AGTAAAAT	0.225772	0.236473	1.0474
AAGGGAAA	0.195643	0.254813	1.30244	39															ATTTGAAT	1.84355	1.92378	1.04352
ATGCTAAT	1.85346	0.24857	0.134111	40															ATGGAAAT	0.942749	0.958379	1.01658
AAATTAAT	0.41455	0.243887	0.588318	41															ATGTAAAG	0.489299	0.488555	0.99848
AAATTAAG	0.302808	0.238424	0.787376	42															ATTCAAAT	1.57582	1.57141	0.997201
AGTAAAAT	0.225772	0.236473	1.0474	43															AGTTAAAT	0.218907	0.216572	0.989333
AAATAAAT	0.261239	0.232181	0.888767	44															AATGTAAA	0.614007	0.547088	0.891012
ACGTAAAT	0.217381	0.23179	1.06628	45															AAATAAAT	0.261239	0.232181	0.888767
ATTAAAAT	0.614007	0.227888	0.371149	46															ATGTAAAA	0.713545	0.630595	0.883749
AAGTAAAT	0.189923	0.227108	1.19579	47															AATAAAAT	0.21433	0.184964	0.862986
AGGGAAAG	0.194499	0.222035	1.14157	48															AAAATAAT	0.177719	0.152576	0.858524
AGTTAAAT	0.218907	0.216572	0.989333	49															ATTTAAAG	0.183439	0.151795	0.827496
AAATTAAA	0.32836	0.21345	0.650048	50															AAATTAAG	0.302808	0.238424	0.787376
ATGTTAAT	1.38552	0.207597	0.149833	51															ATTGAAAT	0.257425	0.189256	0.73519
ATGGTAAT	1.26615	0.201744	0.159336	52															ATTTCAAT	0.237975	0.174428	0.732967
AAATAAAA	0.177337	0.198622	1.12002	53															ATCTAAAT	0.17238	0.122919	0.713073
AATTAAAT	0.333318	0.189647	0.568966	54															AAATGAAT	0.2559	0.181062	0.70755
ATTGAAAT	0.257425	0.189256	0.73519	55															AATTTAAC	0.170473	0.117066	0.686713
AAATTAAC	0.334081	0.188476	0.564163	56															ATGTAAAT	3.45026	2.30073	0.666829
AAATGAAG	0.170473	0.185744	1.08958	57															ATTAAAAA	0.171998	0.114334	0.664741
AATAAAAT	0.21433	0.184964	0.862986	58															AAATTAAA	0.32836	0.21345	0.650048
AATTTAAT	0.306241	0.182233	0.595063	59															AATATAAT	0.213186	0.137357	0.644306
AAATGAAT	0.2559	0.181062	0.70755	60															AATGTAAT	0.169329	0.108871	0.642958
ATTTAAAA	0.30319	0.17794	0.586893	61															AGGGTAAT	0.18649	0.119797	0.642379
ATTTCAAT	0.237975	0.174428	0.732967	62															ATTTTAAA	0.198313	0.126431	0.637534
ATTATAAT	0.940079	0.163112	0.173509	63															AATTGAAT	0.202508	0.127212	0.628181
AATTAAAA	0.364209	0.156478	0.429638	64															ATAATAAA	0.193736	0.117456	0.606268
AAAATAAT	0.177719	0.152576	0.858524	65															AATTAAAG	0.186872	0.112383	0.601392
ATTTAAAG	0.183439	0.151795	0.827496	66															AATTTAAT	0.306241	0.182233	0.595063
ATATTAAT	0.423703	0.14243	0.336156	67															AAATTAAT	0.41455	0.243887	0.588318
ATGATAAT	0.512944	0.137747	0.268543	68															ATTTAAAA	0.30319	0.17794	0.586893
AATATAAT	0.213186	0.137357	0.644306	69															ATGGTAAA	0.181533	0.105359	0.580388
ATTAGAAT	0.500358	0.133455	0.266719	70															AATTAAAT	0.333318	0.189647	0.568966
ATATTAAA	0.297088	0.130724	0.440016	71															AGGATAAT	0.168185	0.0952136	0.566126
AATTGAAT	0.202508	0.127212	0.628181	72															AAATTAAC	0.334081	0.188476	0.564163
ATTTTAAA	0.198313	0.126431	0.637534	73															AGGTTAAT	0.173524	0.0920918	0.530716
ATCTAAAT	0.17238	0.122919	0.713073	74															ATAATAAG	0.182295	0.0940429	0.515882
ATATGAAT	0.242933	0.121748	0.50116	75															ACATAAAT	0.229967	0.116676	0.507359
ATTCTAAT	0.448111	0.120188	0.26821	76															ATCTGAAT	0.201364	0.101847	0.505788
AGGGTAAT	0.18649	0.119797	0.642379	77															ATATGAAT	0.242933	0.121748	0.50116
ATAATAAA	0.193736	0.117456	0.606268	78															ACATTAAT	0.165134	0.0776537	0.470248
AATTTAAC	0.170473	0.117066	0.686713	79															AGAATAAT	0.203271	0.0948233	0.466488
ACATAAAT	0.229967	0.116676	0.507359	80															AGTATAAT	0.19183	0.0866287	0.451592
ATTGTAAT	0.312343	0.115895	0.371051	81															ATGTTAAA	0.212424	0.0956038	0.450062
ATTAAAAA	0.171998	0.114334	0.664741	82															ATATTAAG	0.196025	0.0881896	0.449891
AATTAAAG	0.186872	0.112383	0.601392	83															ATATTAAA	0.297088	0.130724	0.440016
ATAATAAT	0.27268	0.110432	0.404988	84															ATACTAAT	0.170473	0.0745319	0.437207
AATGTAAT	0.169329	0.108871	0.642958	85															ATTACAAT	0.19488	0.0846776	0.434511
ATGGTAAA	0.181533	0.105359	0.580388	86															AATTAAAA	0.364209	0.156478	0.429638
ATCTGAAT	0.201364	0.101847	0.505788	87															ATAATAAT	0.27268	0.110432	0.404988
ATGTTAAA	0.212424	0.0956038	0.450062	88															ATTTTAAT	0.672357	0.257935	0.383628
AGGATAAT	0.168185	0.0952136	0.566126	89															ATTAAAAT	0.614007	0.227888	0.371149
AGAATAAT	0.203271	0.0948233	0.466488	90															ATTGTAAT	0.312343	0.115895	0.371051
ATAATAAG	0.182295	0.0940429	0.515882	91															ATATTAAT	0.423703	0.14243	0.336156
AGGTTAAT	0.173524	0.0920918	0.530716	92															AATTTAAA	0.913383	0.30281	0.331526
ATATTAAG	0.196025	0.0881896	0.449891	93															AGCATAAT	0.268866	0.0757026	0.281562
AGTATAAT	0.19183	0.0866287	0.451592	94															AGCATAAA	0.204415	0.0565818	0.276799
ATTACAAT	0.19488	0.0846776	0.434511	95															ATGATAAT	0.512944	0.137747	0.268543
ACATTAAT	0.165134	0.0776537	0.470248	96															ATTCTAAT	0.448111	0.120188	0.26821
AGCATAAT	0.268866	0.0757026	0.281562	97															ATTAGAAT	0.500358	0.133455	0.266719
ATACTAAT	0.170473	0.0745319	0.437207	98															ATGCTAAA	0.273061	0.0690689	0.252943
ATGCTAAA	0.273061	0.0690689	0.252943	99															ATTTAAAT	2.82672	0.708639	0.250693
AGCATAAA	0.204415	0.0565818	0.276799	100															ATTATAAT	0.940079	0.163112	0.173509
																			ATGGTAAT	1.26615	0.201744	0.159336
																			ATGTTAAT	1.38552	0.207597	0.149833
																			ATGCTAAT	1.85346	0.24857	0.134111

## Sheet: Table S3b. Sorted by POU2+Bob1
	Relative frequency		Ratio
sequense	POU2	POU2+BOB1	POU2+BOB1/POU2	N of sequence
ATGCAAAT	5.4111	12.6271	2.33356	1																				Relative frequency		Ratio
ATGTAAAT	2.8914	3.57284	1.23568	2																			sequense	POU2	POU2+BOB1	POU2+BOB1/POU2
ATGCAAAA	1.1721	3.29217	2.80878	3																			AGGCAAAT	0.546058	2.14552	3.92911
AATGCAAA	1.1042	3.20962	2.90673	4																			ACGCAAAT	0.408537	1.37696	3.37048
ATTTGAAT	1.50065	2.3164	1.5436	5																			AAGCAAAT	0.27044	0.826344	3.05556
ATGCAAAG	0.830883	2.27183	2.73423	6																			AATGCAAA	1.1042	3.20962	2.90673
AGGCAAAT	0.546058	2.14552	3.92911	7																			ATGCAAAC	0.444787	1.268	2.85079
ATTCAAAT	1.29293	1.94987	1.5081	8																			AGTCAAAT	0.367108	1.04346	2.84237
ACGCAAAT	0.408537	1.37696	3.37048	9																			ATGCAAAA	1.1721	3.29217	2.80878
ATGCAAAC	0.444787	1.268	2.85079	10																			ATGCAAAG	0.830883	2.27183	2.73423
AGTCAAAT	0.367108	1.04346	2.84237	11																			AAACAAAT	0.265837	0.669495	2.51845
ATGGAAAT	0.722707	0.981541	1.35815	12																			ATGCAAAT	5.4111	12.6271	2.33356
ATTTAAAT	2.37642	0.832123	0.350158	13																			AGGGAAAT	0.364806	0.713248	1.95514
AAGCAAAT	0.27044	0.826344	3.05556	14																			ATACAAAT	0.268714	0.497788	1.85248
AGGGAAAT	0.364806	0.713248	1.95514	15																			AGGAAAAT	0.200241	0.346718	1.73151
AAACAAAT	0.265837	0.669495	2.51845	16																			ATGAAAAT	0.304389	0.518426	1.70317
ATGTAAAA	0.495998	0.618313	1.2466	17																			ATTTGAAT	1.50065	2.3164	1.5436
AATGTAAA	0.508657	0.552272	1.08575	18																			ATTCAAAT	1.29293	1.94987	1.5081
ATGAAAAT	0.304389	0.518426	1.70317	19																			AGGTAAAT	0.268714	0.391296	1.45618
ATACAAAT	0.268714	0.497788	1.85248	20																			AATCAAAT	0.212324	0.301314	1.41912
ATGTAAAG	0.393001	0.47715	1.21412	21																			AATTCAAA	0.292305	0.400376	1.36972
AATTCAAA	0.292305	0.400376	1.36972	22																			ATGGAAAT	0.722707	0.981541	1.35815
AGGTAAAT	0.268714	0.391296	1.45618	23																			ATGTAAAA	0.495998	0.618313	1.2466
AGGAAAAT	0.200241	0.346718	1.73151	24																			ATGTAAAT	2.8914	3.57284	1.23568
AAATTAAG	0.34179	0.319476	0.934714	25																			ATGTAAAG	0.393001	0.47715	1.21412
AATTTAAA	0.792906	0.312046	0.393547	26																			ATTCAAAG	0.201391	0.241877	1.20103
AATCAAAT	0.212324	0.301314	1.41912	27																			ATGTAAAC	0.195637	0.227018	1.1604
AAATTAAT	0.477585	0.28728	0.601527	28																			AATGTAAA	0.508657	0.552272	1.08575
ATGCTAAT	1.82345	0.283153	0.155284	29																			AAATGAAG	0.188157	0.199775	1.06175
ATTCAAAA	0.277345	0.2782	1.00308	30																			ATTCAAAA	0.277345	0.2782	1.00308
ATTCAAAG	0.201391	0.241877	1.20103	31																			AAATTAAG	0.34179	0.319476	0.934714
ATGTTAAT	1.31135	0.240226	0.18319	32																			AAATGAAT	0.273317	0.238575	0.872888
AAATGAAT	0.273317	0.238575	0.872888	33																			AGTAAAAT	0.178951	0.147768	0.825746
ATGTAAAC	0.195637	0.227018	1.1604	34																			AAATAAAT	0.275043	0.220413	0.801378
ATTTTAAT	0.678976	0.221239	0.325842	35																			AATAAAAT	0.21405	0.164278	0.767475
AAATAAAT	0.275043	0.220413	0.801378	36																			AATGTAAT	0.181252	0.137036	0.756052
ATGGTAAT	1.27797	0.218762	0.171179	37																			AAAATAAT	0.212324	0.155197	0.730946
AAATTAAA	0.348695	0.217111	0.62264	38																			ACATAAAT	0.250876	0.176661	0.704176
ATTATAAT	1.03515	0.207205	0.200169	39																			AATGGAAT	0.212324	0.146942	0.692066
ATTAAAAT	0.635821	0.203903	0.320692	40																			AAAAAAAA	0.19276	0.129606	0.672371
AAATGAAG	0.188157	0.199775	1.06175	41																			AAGATAAT	0.202542	0.128781	0.635823
AAATTAAC	0.330282	0.195648	0.592367	42																			AAATTAAA	0.348695	0.217111	0.62264
ATTAGAAT	0.609928	0.179963	0.295056	43																			ATACTAAT	0.181828	0.109794	0.603835
ATATTAAT	0.558142	0.177486	0.317995	44																			AAATTAAT	0.477585	0.28728	0.601527
ACATAAAT	0.250876	0.176661	0.704176	45																			AGTTAAAT	0.213475	0.12713	0.595526
AATTAAAT	0.389548	0.173359	0.445025	46																			AAATTAAC	0.330282	0.195648	0.592367
AATAAAAT	0.21405	0.164278	0.767475	47																			AAGTTAAT	0.178375	0.102364	0.573871
AATTTAAT	0.333159	0.161802	0.485659	48																			AATATAAA	0.1778	0.100713	0.566442
AAAATAAT	0.212324	0.155197	0.730946	49																			ATGGTAAA	0.191034	0.106492	0.55745
ATTCTAAT	0.531673	0.151895	0.285693	50																			ATATTAAG	0.21405	0.117224	0.547645
AATTAAAA	0.39933	0.15107	0.378308	51																			AATTAAAG	0.22038	0.120526	0.5469
AGTAAAAT	0.178951	0.147768	0.825746	52																			ATCTGAAT	0.231888	0.126304	0.544679
AATGGAAT	0.212324	0.146942	0.692066	53																			ATCTAAAT	0.226709	0.123002	0.542555
ATAATAAT	0.353298	0.142815	0.404233	54																			ATTGGAAT	0.179526	0.0965857	0.538004
ATTTCAAT	0.267563	0.141989	0.530676	55																			ATTTCAAT	0.267563	0.141989	0.530676
ATATGAAT	0.315897	0.141164	0.446867	56																			AATTGAAT	0.237642	0.124653	0.524543
ATATTAAA	0.365381	0.139513	0.381827	57																			ATATAAAT	0.22153	0.115573	0.521701
ATTGTAAT	0.357326	0.137036	0.383505	58																			ACATGAAT	0.178951	0.0924581	0.516668
ATTTAAAA	0.298635	0.137036	0.458875	59																			AGATTAAT	0.20657	0.106492	0.515525
ATTGAAAT	0.290004	0.137036	0.472532	60																			AGGATAAT	0.208872	0.105666	0.505892
AATGTAAT	0.181252	0.137036	0.756052	61																			ATTTTAAA	0.204268	0.10319	0.505168
ATGATAAT	0.582309	0.135385	0.232497	62																			AGGTTAAT	0.215776	0.108143	0.50118
AATATAAT	0.285976	0.132908	0.464754	63																			AATTAAAC	0.193911	0.0965857	0.498093
AAAAAAAA	0.19276	0.129606	0.672371	64																			AGAATAAA	0.181828	0.089156	0.490333
AGGGTAAT	0.279071	0.128781	0.461463	65																			ATAATAAG	0.258356	0.126304	0.488876
AAGATAAT	0.202542	0.128781	0.635823	66																			AATTTAAT	0.333159	0.161802	0.485659
AGTTAAAT	0.213475	0.12713	0.595526	67																			ACATTAAT	0.214626	0.101539	0.473097
ATAATAAG	0.258356	0.126304	0.488876	68																			ATTGAAAT	0.290004	0.137036	0.472532
ATCTGAAT	0.231888	0.126304	0.544679	69																			AATATAAT	0.285976	0.132908	0.464754
AATTGAAT	0.237642	0.124653	0.524543	70																			AGGGTAAT	0.279071	0.128781	0.461463
ATCTAAAT	0.226709	0.123002	0.542555	71																			AGGCTAAT	0.196788	0.090807	0.461446
AGAATAAT	0.300361	0.122177	0.406767	72																			ATTTAAAA	0.298635	0.137036	0.458875
AGTATAAT	0.289428	0.120526	0.416427	73																			ATATGAAT	0.315897	0.141164	0.446867
AATTAAAG	0.22038	0.120526	0.5469	74																			AATTAAAT	0.389548	0.173359	0.445025
ATATTAAG	0.21405	0.117224	0.547645	75																			AGTATAAT	0.289428	0.120526	0.416427
ATATAAAT	0.22153	0.115573	0.521701	76																			ATGTTAAA	0.215776	0.089156	0.413187
ATACTAAT	0.181828	0.109794	0.603835	77																			ATTAAAAA	0.219229	0.0899815	0.410446
AGGTTAAT	0.215776	0.108143	0.50118	78																			ATTTAAAG	0.18528	0.0759477	0.409908
AGATTAAT	0.20657	0.106492	0.515525	79																			AGCATAAA	0.212899	0.0866794	0.407138
ATGGTAAA	0.191034	0.106492	0.55745	80																			AGAATAAT	0.300361	0.122177	0.406767
AGCATAAT	0.277345	0.105666	0.380993	81																			ATAATAAT	0.353298	0.142815	0.404233
AGGATAAT	0.208872	0.105666	0.505892	82																			ATAATAAA	0.251451	0.0998877	0.397245
ATTTTAAA	0.204268	0.10319	0.505168	83																			ATATTAAC	0.189308	0.0751222	0.396825
AAGTTAAT	0.178375	0.102364	0.573871	84																			AATTTAAA	0.792906	0.312046	0.393547
ACATTAAT	0.214626	0.101539	0.473097	85																			ATTATAAA	0.203693	0.0800753	0.393118
AATATAAA	0.1778	0.100713	0.566442	86																			ATTGTAAT	0.357326	0.137036	0.383505
ATAATAAA	0.251451	0.0998877	0.397245	87																			ATATTAAA	0.365381	0.139513	0.381827
ATTACAAT	0.260083	0.0965857	0.371365	88																			AGCATAAT	0.277345	0.105666	0.380993
AATTAAAC	0.193911	0.0965857	0.498093	89																			AATTAAAA	0.39933	0.15107	0.378308
ATTGGAAT	0.179526	0.0965857	0.538004	90																			ATTACAAT	0.260083	0.0965857	0.371365
ACATGAAT	0.178951	0.0924581	0.516668	91																			ATTTAAAT	2.37642	0.832123	0.350158
AGGCTAAT	0.196788	0.090807	0.461446	92																			ATTTTAAT	0.678976	0.221239	0.325842
ATTAAAAA	0.219229	0.0899815	0.410446	93																			ATTAAAAT	0.635821	0.203903	0.320692
ATGTTAAA	0.215776	0.089156	0.413187	94																			ATATTAAT	0.558142	0.177486	0.317995
AGAATAAA	0.181828	0.089156	0.490333	95																			ATTAGAAT	0.609928	0.179963	0.295056
AGCATAAA	0.212899	0.0866794	0.407138	96																			ATTCTAAT	0.531673	0.151895	0.285693
ATGCTAAA	0.293456	0.0817263	0.278496	97																			ATGCTAAA	0.293456	0.0817263	0.278496
ATTATAAA	0.203693	0.0800753	0.393118	98																			ATGATAAT	0.582309	0.135385	0.232497
ATTTAAAG	0.18528	0.0759477	0.409908	99																			ATTATAAT	1.03515	0.207205	0.200169
ATATTAAC	0.189308	0.0751222	0.396825	100																			ATGTTAAT	1.31135	0.240226	0.18319
																							ATGGTAAT	1.27797	0.218762	0.171179
																							ATGCTAAT	1.82345	0.283153	0.155284
